# Supplementary material for: Variation in model performance by data cleanliness and classification methods in the prediction of 30-day ICU mortality, a US nationwide retrospective cohort and simulation study
Source: PubMed Central journal article supplement — BMJ Open. 2020 Dec 2;10(12):e041421. doi: 10.1136/bmjopen-2020-041421 (PMC7713192; doi:10.1136/bmjopen-2020-041421), 2020-12-02
Supplement: bmjopen-2020-041421.draft_revisions.pdf [file bmjopen-2020-041421.draft_revisions.pdf]

# BMJ Open

BMJ Open is committed to open peer review. As part of this commitment we make the peer review history of every article we publish publicly available.

When an article is published we post the peer reviewers' comments and the authors' responses online. We also post the versions of the paper that were used during peer review. These are the versions that the peer review comments apply to.

The versions of the paper that follow are the versions that were submitted during the peer review process. They are not the versions of record or the final published versions. They should not be cited or distributed as the published version of this manuscript.

BMJ Open is an open access journal and the full, final, typeset and author-corrected version of record of the manuscript is available on our site with no access controls, subscription charges or pay-per-view fees (<http://bmjopen.bmj.com>).

If you have any questions on BMJ Open's open peer review process please email [info.bmjopen@bmj.com](mailto:info.bmjopen@bmj.com)

# BMJ Open

## Garbage Input, Variable Output: Variation in Model Performance by Data Cleanliness and Classification Methods in the Prediction of 30-day ICU Mortality

|                               |                                                                                                                                                                                                                                                                                                                                                                                                                                                                                                                                                                                |
|-------------------------------|--------------------------------------------------------------------------------------------------------------------------------------------------------------------------------------------------------------------------------------------------------------------------------------------------------------------------------------------------------------------------------------------------------------------------------------------------------------------------------------------------------------------------------------------------------------------------------|
| Journal:                      | <i>BMJ Open</i>                                                                                                                                                                                                                                                                                                                                                                                                                                                                                                                                                                |
| Manuscript ID                 | bmjopen-2020-041421                                                                                                                                                                                                                                                                                                                                                                                                                                                                                                                                                            |
| Article Type:                 | Original research                                                                                                                                                                                                                                                                                                                                                                                                                                                                                                                                                              |
| Date Submitted by the Author: | 10-Jun-2020                                                                                                                                                                                                                                                                                                                                                                                                                                                                                                                                                                    |
| Complete List of Authors:     | Iwashyna, Theodore; University of Michigan, Internal Medicine; VA Center for Clinical Management Research, Ann Arbor VA Medical Center<br>Ma, Cheng; University of Michigan, Statistics<br>Wang, Xiao Qing; VA Center for Clinical Management Research, Ann Arbor VA Medical Center<br>Seelye, Sarah; VA Center for Clinical Management Research, Ann Arbor VA Medical Center<br>Zhu, Ji; University of Michigan, Department of Statistics<br>Waljee, Akbar; University of Michigan, Gastroenterology; VA Center for Clinical Management Research, Ann Arbor VA Medical Center |
| Keywords:                     | Health informatics < BIOTECHNOLOGY & BIOINFORMATICS, STATISTICS & RESEARCH METHODS, Adult intensive & critical care < INTENSIVE & CRITICAL CARE                                                                                                                                                                                                                                                                                                                                                                                                                                |
|                               |                                                                                                                                                                                                                                                                                                                                                                                                                                                                                                                                                                                |

SCHOLARONE™  
Manuscripts

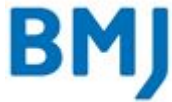

I, the Submitting Author has the right to grant and does grant on behalf of all authors of the Work (as defined in the below author licence), an exclusive licence and/or a non-exclusive licence for contributions from authors who are: i) UK Crown employees; ii) where BMJ has agreed a CC-BY licence shall apply, and/or iii) in accordance with the terms applicable for US Federal Government officers or employees acting as part of their official duties; on a worldwide, perpetual, irrevocable, royalty-free basis to BMJ Publishing Group Ltd ("BMJ") its licensees and where the relevant Journal is co-owned by BMJ to the co-owners of the Journal, to publish the Work in this journal and any other BMJ products and to exploit all rights, as set out in our [licence](#).

The Submitting Author accepts and understands that any supply made under these terms is made by BMJ to the Submitting Author unless you are acting as an employee on behalf of your employer or a postgraduate student of an affiliated institution which is paying any applicable article publishing charge ("APC") for Open Access articles. Where the Submitting Author wishes to make the Work available on an Open Access basis (and intends to pay the relevant APC), the terms of reuse of such Open Access shall be governed by a Creative Commons licence – details of these licences and which [Creative Commons](#) licence will apply to this Work are set out in our licence referred to above.

Other than as permitted in any relevant BMJ Author's Self Archiving Policies, I confirm this Work has not been accepted for publication elsewhere, is not being considered for publication elsewhere and does not duplicate material already published. I confirm all authors consent to publication of this Work and authorise the granting of this licence.

1 **Title:** Garbage Input, Variable Output: Variation in Model Performance by Data Cleanliness and Classification Methods in  
2 the Prediction of 30-day ICU Mortality  
3  
4

5 **Authors:**

6 Theodore J. Iwashyna\*, M.D., PhD (1,2,3)

7 Cheng Ma\*, B.S. (4)

8 Xiao Qing Wang, MPH (1)

9 Sarah Seelye, Ph.D. (1)

10 Ji Zhu, Ph.D. (4)

11 Akbar K. Waljee, M.D., M.Sc. (1,2,3)

12 \*considered co-first authors.

- 13  
14  
15  
16  
17  
18  
19  
20  
21  
22  
23 1) VA Center for Clinical Management Research, VA Ann Arbor Health Care System, Ann Arbor, MI, USA.  
24 2) Department of Internal Medicine, Michigan Medicine, Ann Arbor, MI, USA.  
25 3) Michigan Integrated Center for Health Analytics and Medical Prediction (MiCHAMP), Ann Arbor, MI, USA  
26 4) Department of Statistics, University of Michigan, Ann Arbor, MI, USA.  
27  
28

29 **Address correspondence to:** Akbar K. Waljee, M.D. M.Sc., Associate Professor of Medicine, Division of Gastroenterology,  
30 Department of Internal Medicine, Michigan Medicine, Ann Arbor Veterans Affairs Medical Center, 2215 Fuller Road, 111D,  
31 Ann Arbor, Michigan 48105  
32

33 Phone: 734-845-5865; Fax: 734-845-3091; E-mail: [awaljee@med.umich.edu](mailto:awaljee@med.umich.edu)

34  
35  
36  
37 **Keywords:** missing data, risk prediction, machine learning, electronic health record data, random forests  
38  
39

40 **Word count:** 3,085  
41  
42  
43  
44  
45  
46  
47  
48  
49  
50  
51  
52  
53  
54  
55  
56  
57  
58  
59  
60

**ABSTRACT**

**Objective:** There has been a proliferation of approaches to statistical methods and missing data imputation as electronic health records become more plentiful. The relative performance on real-world problems is unclear.

**Materials and Methods:** Using 355,823 ICU hospitalizations at over 100 hospitals in the nationwide VA healthcare system (2014-2017), we systematically varied 3 approaches: how we extracted and cleaned physiologic variables; how we handled missing data (using mean value imputation, random forest, extremely randomized trees (extra-trees regression), ridge regression, normal value imputation, and case-wise deletion); and how we computed risk (using logistic regression, random forest, and neural networks). We applied these approaches in a 70% development sample and tested the results in an independent 30% testing sample. Area under the ROC Curve (AUROC) was used to quantify model discrimination.

**Results:** In 355,823 ICU stays, there were 34,867 deaths (9.8%) within 30 days of admission. The highest AUROC's obtained for each primary classification method were very similar: 0.83 (95% CI [0.83-0.83]) to 0.85 (95% CI 0.84-.0.85). Likewise, there was relatively little variation within classification method by the missing value imputation method used—except when case-wise deletion was used for missing data.

**Discussion:** Variation in discrimination was seen as a function of data cleanliness, with logistic regression suffering the most loss of discrimination in the least clean data. Losses in discrimination were not present in random forest and neural networks even in naively extracted data.

**Conclusion:** Data from a large nationwide health system revealed interactions between missing data imputation techniques, data cleanliness, and classification methods for predicting 30-day mortality.

## STRENGTHS AND LIMITATIONS OF THIS STUDY

---

- This study focuses on a large, real world data set consisting of 355,823 ICU stays at over 100 different facilities.
- Multiple methods of model fitting and missing data imputation were implemented in standardized ways that reflect common practice.
- The approach we used for each implementation is available in an Appendix or via GitHub to allow transparency and reproducibility, and we encourage validation on other data sets.
- Due to high dimensionality of method combinations, this study only considered one outcome, and only considered one standardized and decided upon a priori approach within each dataset / categorization model / missingness imputation triad.

For peer review only

## INTRODUCTION

Risk adjustment plays an increasingly central role in the organization, care of, and science about critically ill patients[1, 2]. Statistical adjustment is essential for many performance measurement as well as pay-for-performance and shared savings systems, from US News and World Report to Medicare and Medicaid. It is used to stratify the care of patients for treatments and track quality improvement efforts over time[3]. It is routinely measured, even in clinical trials, to assess confounder balance between arms and may form part of RCT enrollment or drug approval criteria[4].

As a result, there has been a proliferation of risk scores both for the common task of short-term mortality prediction and for assorted more specialized tasks. Many statistical tools have been promoted. Rules of thumb have developed and existed long enough to be critiqued[5-9]. The Transparent Reporting of a multivariable prediction model for Individual Prognosis Or Diagnosis (TRIPOD) guidelines offer standardization of reporting[10]. Textbooks have emerged[11]. Yet questions remain on fundamental pragmatic issues: How clean does the data have to be to prevent the so-called “garbage in, garbage out (GIGO)” phenomenon? How sensitive are methods to missing data and how should it be handled? Do these analysis decisions interact?

To address such questions, we compared the performance of an array of methods on a single standardized common problem—the prediction of 30-day mortality from day 1 laboratory results among patients admitted to the Intensive Care Unit (ICU) at any hospital in the nationwide Veterans Health Administration system[12-14]. Using exactly the same set of real ICU admissions, we systematically varied three parameters: the approach used to extract and clean physiologic variables from the electronic health record; the approach used to handle missing data; and the approach used to compute the risk. We systematically applied these approaches in a 70% development sample and tested the results in an independent 30% testing sample, to provide real world comparisons to inform future pragmatic implementation of risk scores.

## METHODS

### Cohort

Data were drawn from the Veterans Affairs Patient Database (VAPD 2014-2017), which contains daily patient physiology for acute hospitalizations between January 1, 2014 and December 31, 2017. The VAPD 2014-2017 includes patient demographics, laboratory results, and diagnoses that are commonly used to predict 30-day mortality from the day of admission. Here, we included data from all ICU hospitalizations on day 1 of each hospitalization. Full details of the VAPD 2014-2017 have been published elsewhere[15].

The development of this data was reviewed and approved by the VA Ann Arbor Healthcare System's Institutional Review Board.

Four versions of the dataset were created for each hospitalization on admission: A) raw lab values extracted using only lab test names, B) raw lab values extracted using only Logical Observation Identifiers Names and Codes (LOINC), C) cleaned lab values extracted using both LOINC[16, 17] and searched text lab test names, and D) cleaned lab values converted to Acute Physiology And Chronic Health Evaluation (APACHE) points, extracted using both LOINC and lab test names.

### No Patient and Public Involvement

This research was done without patient involvement. Patients were not invited to comment on the study design and were not consulted to develop patient relevant outcomes or interpret the results. Patients were not invited to contribute to the writing or editing of this document for readability or accuracy.

### Predictor Variables

In our primary analyses, we adjust for 10 laboratory values that were collected within one day of hospital admission. Further patient-level adjustments included demographic characteristics (gender, age, race, and Hispanic ethnicity), 30 comorbidities, and 38 primary diagnoses. The individual comorbidities used in models are defined by methods described



1 in van Walraven's implementation of the Elixhauser comorbidity score[18]. We adjust for 38 primary diagnoses drawn  
2 from the Healthcare Cost and Utilization (HCUP) Clinical Classification Software (CCS)[19], which consist of the top 20  
3 most frequent single-level CCS diagnoses and 18 level-one multi-level categories of diagnoses (Appendix A.) In secondary  
4 analyses, to emphasize the role of data cleanliness, we estimate risk using *only* the laboratory values since the non-  
5 laboratory values do not vary in data cleanliness and curation.  
6  
7  
8  
9  
10  
11  
12

### 13 **Outcome Variable: 30-day mortality**

14 Our primary outcome variable is 30-day all-cause mortality, defined as death within 30 days of the admission date for  
15 the index hospitalization. Mortality is evaluated using the highly reliable Veterans Administration beneficiary death files  
16 which aggregate from several sources[12, 20, 21].  
17  
18  
19  
20  
21  
22  
23  
24

### 25 **Statistical Analysis and Model Development**

26 Random Forests is an ensemble machine learning method that aggregates the results of multiple decision trees fit on  
27 bootstrap samples of the original data[22, 23]. For each decision tree, the original data are bootstrapped to create a new  
28 dataset of the same size and the tree is fit to the new data. Instead of considering all predictors to determine the splitting  
29 criterion at a node, the split variable is chosen from a random subset of variables in order to reduce the correlation  
30 between different trees. Many such trees are grown, creating a 'forest'. Each observation is classified by each tree, and  
31 the majority classification over all trees is the predicted class. The ability of random forests to learn nonlinear and complex  
32 functions contributes to its predictive performance.  
33  
34  
35  
36  
37  
38  
39  
40  
41  
42  
43  
44  
45

46 The neural network[24] can "learn" to classify samples without manual designed task-specific rules. The algorithm applies  
47 different weights to predictors and uses these transformations in subsequent "layers" of the neural net, culminating in  
48 the output layer with predictions. We applied the random forest and the neural network on our task. A traditional logistic  
49 regression model was also performed and compared.  
50  
51  
52  
53  
54  
55  
56  
57  
58  
59  
60

1 Statistical analyses were performed with Python and the scikit-learn package[25].  
2  
3  
4  
5

## 6 **Training and Testing Sets** 7

8 The dataset was randomly split into a 70% training set and a 30% testing set. The same split was used for all classification  
9 methods. This process was replicated five times (five different training sets and corresponding testing set were generated),  
10 and each time the models were fit on the training set and used to predict the 30-day mortality of the testing set.  
11  
12  
13  
14  
15

## 16 **Missing Data and Imputation** 17

18 We imputed the missing values before training and testing the models, comparing:  
19  
20  
21  
22

- 23 ● “Mean Value”: the mean value of each variable in the training set was used to replace missing values[26].
- 24 ● “Random Forest”: use random forest to impute missing values (missForest)[27].
- 25 ● “Extremely Randomized Trees (Extra-Trees Regression)”: this method is similar to random forest but is faster[28,  
26 29].
- 27 ● “Ridge Regression”: use Bayesian Ridge regression to impute missing values[30].
- 28 ● “Normal Value”[31]: use normal values to impute missing values—this is common in clinical prediction contexts  
29 in which it is assumed that clinicians order tests they fear are not normal, and therefore the absence of such a test  
30 is a sign that the clinician reviewed other aspects of the patient’s case and judged the odds of physiologic  
31 abnormality so low that testing was not indicated.
- 32 ● “No Missing”: case-wise deletion[32].  
33  
34  
35  
36  
37  
38  
39  
40  
41  
42  
43  
44  
45  
46  
47

## 48 **Variable Importance and Partial Dependence Plots** 49

50 Predictor variable importance is evaluated for random forests[33]. When classifying a sample using a decision tree, a  
51 predictor is used at each node. Predictors that appear more frequently and that reduce the misclassification more  
52 substantially are considered more important. By combining all trees in a random forest model, we assessed the variable  
53  
54  
55  
56  
57  
58  
59  
60

importance of each predictor. We also plotted the Partial Dependence Plots[30] to show how the value of predictors affects 30-day mortality. Partial dependence plots are used to visualize assess non-linearity among variables.

## RESULTS

### Cohort Description

The cohort involved 355,823 ICU hospitalizations at over 100 different hospitals, as has been described elsewhere. The mean age of the cohort was 66.9 years, and there were 34,867 deaths within 30-days of admission, a primary outcome event rate of 9.8% (Table 1.)

**Table 1.** ICU Patient Demographics

| Variables                       | ICU Only Cohort |
|---------------------------------|-----------------|
| Hospitalizations, N             | 355,823         |
| Age, mean (SD), y               | 66.9 (11.6)     |
| Male, N (%)                     | 341,579 (96.0)  |
| Race, N (%)                     |                 |
| White                           | 256,293 (72.0)  |
| Black or African American       | 73,855 (20.8)   |
| Other                           | 25,675 (7.2)    |
| Hispanic, N (%)                 | 20,532 (5.8)    |
| 30-day Mortality, N (%)         | 34,867 (9.8)    |
| Length of Stay, mean (SD), days | 9.5 (13.0)      |

Rates of data missingness for each laboratory value in each dataset are shown in Table 2.

**Table 2.** Proportion of Labs Missing

| Dataset | Albumin (albval) | Bilirubin (bili) | Blood urea nitrogen (bun) | Creatinine (creat) | Glucose (glucose) | Hematocrit (hct) | Partial Pressure (pao2) | pH (pa) | Sodium (na) | White Blood Cell (wbc) |
|---------|------------------|------------------|---------------------------|--------------------|-------------------|------------------|-------------------------|---------|-------------|------------------------|
| A       | 0.39             | 0.42             | 0.84                      | 0.13               | 0.07              | 0.85             | 0.66                    | 0.14    | 0.11        | 0.13                   |
| B       | 0.38             | 0.42             | 0.13                      | 0.13               | 0.06              | 0.12             | 0.65                    | 0.44    | 0.11        | 0.13                   |
| C       | 0.39             | 0.45             | 0.13                      | 0.12               | 0.06              | 0.11             | 0.69                    | 0.64    | 0.11        | 0.13                   |

### Using all Data for Model Development

1 Figure 1 shows the AUC scores of different classification models and imputation methods in the primary analysis. The  
2 highest AUC's obtained for each primary classification method (rows of the figure: logistic regression, random forest, or a  
3 neural network) were very similar: AUC's of 0.83 to 0.85. Likewise, there was relatively little variation within classification  
4 method by the missing value imputation method used, be it mean value imputation, random forest, extremely randomized  
5 trees (extra-trees regression), ridge regression, or normal value imputation. All models suffered dramatic losses in  
6 discrimination when case-wise deletion was used for missing data in the least clean dataset (far right columns). Full model  
7 performance for each condition can be seen in Appendix B.  
8  
9  
10  
11  
12  
13  
14  
15  
16  
17  
18

19 Variation in discrimination was seen, however, across classification methods, as a function of data cleanliness. (Note that  
20 the analyst was blinded to which dataset was which during the analysis). In the logistic regression model developed using  
21 the least clean data (dataset A had raw lab values extracted using only lab test names), performance was always lower  
22 than the performance with the more complete and clean datasets—by AUC's of 0.05 to about 0.1, p-value < 0.05).  
23 Similarly, performance in dataset B (extracted using LOINC codes without unit standardization) was lower and more  
24 unstable for mean value imputation and ridge regression. In marked contrast, neither random forests nor neural networks  
25 showed such reduced performance when developed in less clean data—in no case did the AUC degradations exceed 0.025  
26 despite similar optimal performance.  
27  
28  
29  
30  
31  
32  
33  
34  
35  
36  
37  
38  
39

#### 40 **Secondary Analysis Using only Laboratory Values**

41  
42 The primary analysis presented above considers the real world case in which demographics, diagnoses, and laboratory  
43 values are used in combination in risk model prediction. Yet, of these, only laboratory values were subject to variation in  
44 cleanliness; therefore we conducted a secondary analysis using only laboratory values in order to bring more clearly into  
45 relief the impact of data quality. Results are shown in Figure 2.  
46  
47  
48  
49  
50  
51  
52  
53  
54  
55  
56  
57  
58  
59  
60

1 Average model performance with this much smaller group of predictors is, as expected, somewhat lower with less data—  
2 optimal AUC's typically range from 0.73 to 0.78 across combinations of classification model and missing data imputation.  
3  
4 No uniformly superior strategy is evident, save markedly lower performance of case-wise deletion in the least clean  
5  
6 dataset (A). As before, logistic regression shows markedly reduced discrimination when developed in the least clean data  
7  
8 set. Neural networks show consistent performance.  
9

10  
11  
12 Also notable is the marked reduction of discrimination of random forest models and neural network models regardless of  
13  
14 missing data imputation model in dataset D. Dataset D is the “cleanest” data, in that it has hand-curated inclusion criteria,  
15  
16 standardization of units, but then also conversion of all values from their continuous scale to a semi-quantitative set of  
17  
18 “points” as is done in the APACHE scoring algorithms. Attempting to work with such standardized point values as inputs  
19  
20 consistently resulted in markedly worse discrimination in random forest models and neural network models than using  
21  
22 other “less clean” datasets (The difference between Dataset D and other datasets is significant with a p-value < 0.05).  
23  
24  
25  
26  
27

### 28 **Variable Importance**

29  
30 The most important predictors were age and laboratory values. Age had the highest importance scores, regardless of  
31  
32 which dataset was used, indicating that age is the most important variable when predicting 30-day mortality. The 10  
33  
34 laboratory values also got high importance scores. For datasets A, B, and C, they fell in the top-13 most important variables,  
35  
36 and there were at least eight laboratory values in the top-10 most important variables. However, for dataset D, there were  
37  
38 only 6 laboratory values in the top-10 most important variables, and the variable white blood cell score ranked the 20<sup>th</sup>.  
39  
40 This may indicate that transforming laboratory values to APACHE scores results in the loss of information contained in the  
41  
42 original values and negatively influence the performance of the random forest model.  
43  
44  
45  
46  
47  
48

### 49 **Partial Dependence Plots**

50  
51 As it is hard to visualize the relationship between multiple predictors and the outcome, we created partial dependence  
52  
53 plots to show the effect of predictors on the outcome[34]. The plots can also show whether the relationship between a  
54  
55 specific predictor and the outcome is linear, quadratic, monotonic, or more complex. Further analysis can be done by  
56  
57  
58  
59  
60

1 combining the partial dependence plots and medical knowledge. **Figure 3** and **Figure 4** are the partial dependence plots  
2 for the pH score and the PaO<sub>2</sub> score. We will take these as examples to show how the value of predictors in different  
3 datasets affects 30-day mortality. The X-axis is the value of the predictor. For each value of the predictor, the Y-axis is the  
4 averaged model output for all observations with the corresponding value of the predictor. As we know, the normal value  
5 of the pH score is 7.4, and both higher value and lower value are abnormal. Therefore, a U-shaped partial dependence  
6 plot is to be expected for datasets A, B, and C. However, only the plot for dataset C is U-shaped. It is because the dataset  
7 C is the cleanest one, and the models can learn the real effect of pH score on the 30-day mortality. Datasets A and B are  
8 not as clean as dataset C, as some other variables are presented in these datasets as pH score. Thus, it is difficult for the  
9 models to utilize the pH score variable in datasets A and B. This result indicates that cleaner variable benefits the  
10 classification models. However, not all variables have this problem. For most other variables such as the PaO<sub>2</sub> score, the  
11 plots of datasets A, B, and C have similar trends.

## 28 DISCUSSION

30 We used real data from a large nationwide health system to explore the interaction between missing data imputation  
31 techniques, data cleanliness, and classification methods for the common problem of predicting 30-day mortality in a  
32 held-out testing dataset. In brief, we found that any of several imputation techniques other than case-wise deletion  
33 performed equivalently in terms of discrimination, regardless of data cleanliness or classification method to be used. We  
34 found that logistic regression showed worse discrimination with less carefully cleaned data than did random forest or  
35 neural networks. Random forest models (and to a degree, neural networks) displayed diminished discrimination when  
36 given data that had been too highly cleaned and standardized prior to use.

### 50 Relationship to Past Research

52 Missing data are ubiquitous in large datasets. Even when missingness is completely at random, missing lead to  
53 significant loss in statistical power and predictive ability[32]. We have previously found that the Random Forest method

1 consistently produced the lowest imputation error compared to commonly used imputation methods[26]. Random  
2 Forest had the smallest prediction difference when 10-30% of the laboratory data was missing. Yet our present analysis  
3 of real data shows that as more specialized laboratory values are introduced into the prediction setting, much higher  
4 levels of missingness may be present, and Random Forest continues to perform well for missing data. Our findings on  
5 the poor performance of case-wise deletion as an approach to handling missing data are consonant with mainstream  
6 recommendations for more than two decades[32].  
7  
8  
9  
10  
11  
12

13  
14  
15  
16  
17 Our findings on missing data are of note because of the distinctive, yet real-world, way in which missing data were  
18 generated. There were two missingness processes. First, clinicians in routine practice only sometimes order any given  
19 laboratory, and thus the presence or absence of an order may itself provide prognostic importance. [35] Second, a given  
20 effort to identify all of a given target laboratory values may or may not succeed. Even in a large system with a strong  
21 tradition of centralization, the extent to which laboratory ascension and labeling practices coincide with their aspiration  
22 varies over time, and often clinical insight is necessary to distinguish valid laboratory tests[36]. For any given data pull, it  
23 is not trivial to understand which missing values represent failure to find data that exist, versus representing true  
24 missingness.  
25  
26  
27  
28  
29  
30  
31  
32  
33  
34  
35  
36  
37  
38

39 The finding of poorer discrimination of Random Forest in models where the data were fully standardized and cleaned  
40 was not anticipated given past literature. The APACHE score was designed to simplify the lab results and to help doctors  
41 to predict mortality by hand[2]. Even in its more recent incarnations, APACHE transforms continuous lab results into  
42 discrete acute physiology scores[37]. Our data suggests that transforming lab results to APACHE scores is not necessary  
43 for Random Forest and may even lead to the loss of information[23]. Remarkably, even standardization to equivalent  
44 units across institutions may not be necessary—but at the same time, this means that sources of variance other than  
45 simply the laboratory value may also be subtly incorporated into risk-prediction with non-standardized ways. It is a use-  
46 case-specific decision as to whether incorporation of such variance is helpful for a given task or is a source of bias.  
47  
48  
49  
50  
51  
52  
53  
54  
55  
56  
57  
58  
59  
60

## Implications

Our findings have implications for both practitioners seeking to implement a given prediction rule and scientists interested in risk-prediction generally. For practitioners, no given method yields consistently superior results in terms of discrimination. Therefore, other performance desiderata, whether psychometric or implementation ease, may play an important role. They also suggest that missing data imputation approaches other than case-wise deletion during development are mandatory.

Our results also note that Random Forests and neural networks were strikingly robust to even quite naively prepared data, in contrast to logistic regression. This suggests that the truth of the oft-quoted aphorisms about “garbage in, garbage out” may depend on the categorization model and missing data imputation method used. In situations where ascertainment and cleaning of data are more costly, random forests may offer pragmatic advantages if these findings are replicable.

## Strengths and Limitations

Strengths of our analysis include its use of real world data, with real world data generation and missingness-generation problems on a canonical real world problem. We also used multiple methods implemented in standardized ways. The approach we used for each implementation is available in an Appendix or via GitHub to allow transparency and reproducibility.

Limitations of our analysis stem fundamentally from the nearly infinite combinations of analysis factors that might be varied, and our inability to explore such a high dimensional space. Thus we only considered one outcome, and only considered one standardized and decided upon a priori approach within each dataset / categorization model /



1 missingness imputation triad. Other outcomes may yield different answers. We focus on discrimination, as measured by  
2 AUC, but other measurement properties are assuredly also important. And we focused on individual-level prediction, as  
3  
4 opposed to considering the impact on hospital-level quality assessment or other tasks for which these results may be  
5  
6 used.  
7  
8

## 9 **CONCLUSION**

10  
11  
12 In sum, our results suggest that while there is little variation in discrimination among alternative statistical classification  
13  
14 models in well-cleaned data using modern missing data imputation techniques, there may be important variation across  
15  
16 models in real world situations. If these findings are replicated in other data with other outcomes, they may help inform  
17  
18 pragmatic model selection.  
19  
20  
21  
22  
23  
24  
25  
26  
27  
28  
29  
30  
31  
32  
33  
34  
35  
36  
37  
38

## 39 **Figure Captions**

40  
41 Figure 1. AUC Scores, Full Model

42  
43 Figure 2. AUC Scores for lab-only predictors

44  
45 Figure 3. Partial Dependence Plots for pH

46  
47 Figure 4. Partial Dependence Plots for PaO2  
48  
49  
50  
51  
52  
53  
54  
55  
56  
57  
58  
59  
60

## ACKNOWLEDGEMENTS

### Author Contributions

**Theodore J. Iwashyna:** Conceptualization, Investigation, Methodology, Supervision, Writing – original draft, Writing – review & editing

**Cheng Ma:** Formal analysis, software, visualization, writing-original draft, and writing-review & editing

**Xiao Qing Wang:** Data curation; Writing – original draft; Writing – review & editing

**Sarah Seelye :** Writing – original draft; Writing – review & editing

**Ji Zhu :** Conceptualization, Methodology, Supervision, Writing – original draft, Writing – review & editing

**Akbar K. Waljee:** Conceptualization, Methodology, Supervision, Writing – original draft, Writing – review & editing

**Declarations of funding interests:** This work was supported by a career development grant award [CDA 11-217 to A.K.W] and a Merit Review Award Number [IIR 16-024 to A.K.W, 17-045 to T.J.I.] from the United States Department of Veterans Affairs Health Services Research. The content is solely the responsibility of the authors and does not necessarily represent the official views of the University of Michigan, the Veterans Affairs, the U.S. Government, or the National Institutes of Health.

**Disclosures:** The authors declare there are no conflicts to disclose

**Guarantor of the article:** Akbar K. Waljee the submission's guarantor, takes responsibility for the integrity of the work as a whole, from inception to published article.

### Licensing Statement:

I, Akbar Waljee, as the Submitting Author have the right to grant and does grant on behalf of all authors of the Work (as defined in the below author licence), an exclusive licence and/or a non-exclusive licence for contributions from authors who are: i) UK Crown employees; ii) where BMJ has agreed a CC-BY licence shall apply, and/or iii) in accordance with the terms applicable for US Federal Government officers or employees acting as part of their official duties; on a worldwide, perpetual, irrevocable, royalty-free basis to BMJ Publishing Group Ltd ("BMJ") its licensees and where the relevant Journal is co-owned by BMJ to the co-owners of the Journal, to publish the Work in BMJ Open and any other BMJ products and to exploit all rights, as set out in our [licence](#).

The Submitting Author accepts and understands that any supply made under these terms is made by BMJ to the Submitting Author unless you are acting as an employee on behalf of your employer or a postgraduate student of an affiliated institution which is paying any applicable article publishing charge ("APC") for Open Access articles. Where the Submitting Author wishes to make the Work available on an Open Access basis (and intends to pay the relevant APC),

1 the terms of reuse of such Open Access shall be governed by a Creative Commons licence – details of these licences and  
2 which [Creative Commons](#) licence will apply to this Work are set out in our licence referred to above.

3 **Data Sharing Statement:**  
4

5 Appendices and statistical code are available via Github at <https://github.com/CCMRcodes/GIVO> . The dataset cannot be  
6 disseminated due to inclusion of sensitive patient information under VA regulations.  
7  
8  
9  
10  
11  
12  
13  
14  
15  
16  
17  
18  
19  
20  
21  
22  
23  
24  
25  
26  
27  
28  
29  
30  
31  
32  
33  
34  
35  
36  
37  
38  
39  
40  
41  
42  
43  
44  
45  
46  
47  
48  
49  
50  
51  
52  
53  
54  
55  
56  
57  
58  
59  
60

For peer review only

## REFERENCES

- 1 [1] Iezzoni LI. Risk adjustment for measuring health care outcomes. 4th ed. Chicago, Ill. Arlington, VA: Health  
2 Administration Press; AUPHA; 2013.
- 3 [2] Lane-Fall MB, Neuman MD. Outcomes measures and risk adjustment. *Int Anesthesiol Clin*. 2013;51:10-21.
- 4 [3] Quality AfHRa. Part II. Introduction to Measures of Quality (continued). Rockville, MD.
- 5 [4] Bernard GR, Vincent JL, Laterre PF, LaRosa SP, Dhainaut JF, Lopez-Rodriguez A, et al. Efficacy and safety of  
6 recombinant human activated protein C for severe sepsis. *N Engl J Med*. 2001;344:699-709.
- 7 [5] Harrell FE, Lee KL, Califf RM, Pryor DB, Rosati RA. Regression modelling strategies for improved prognostic prediction.  
8 *Stat Med*. 1984;3:143-52.
- 9 [6] Harrell FE, Lee KL, Mark DB. Multivariable prognostic models: issues in developing models, evaluating assumptions  
10 and adequacy, and measuring and reducing errors. *Stat Med*. 1996;15:361-87.
- 11 [7] van Smeden M, de Groot JA, Moons KG, Collins GS, Altman DG, Eijkemans MJ, et al. No rationale for 1 variable per 10  
12 events criterion for binary logistic regression analysis. *BMC Med Res Methodol*. 2016;16:163.
- 13 [8] Riley RD, Snell KI, Ensor J, Burke DL, Harrell FE, Jr., Moons KG, et al. Minimum sample size for developing a  
14 multivariable prediction model: PART II - binary and time-to-event outcomes. *Stat Med*. 2019;38:1276-96.
- 15 [9] van Smeden M, Moons KG, de Groot JA, Collins GS, Altman DG, Eijkemans MJ, et al. Sample size for binary logistic  
16 prediction models: Beyond events per variable criteria. *Stat Methods Med Res*. 2019;28:2455-74.
- 17 [10] Moons KG, Altman DG, Reitsma JB, Ioannidis JP, Macaskill P, Steyerberg EW, et al. Transparent Reporting of a  
18 multivariable prediction model for Individual Prognosis or Diagnosis (TRIPOD): explanation and elaboration. *Ann Intern  
19 Med*. 2015;162:W1-73.
- 20 [11] Steyerberg EW, ProQuest (Firm). Clinical prediction models a practical approach to development, validation, and  
21 updating. New York: Springer; 2009. p. xxviii, 497 p.
- 22 [12] Render ML, Kim HM, Welsh DE, Timmons S, Johnston J, Hui S, et al. Automated intensive care unit risk adjustment:  
23 results from a National Veterans Affairs study. *Crit Care Med*. 2003;31:1638-46.
- 24 [13] Render ML, Deddens J, Freyberg R, Almenoff P, Connors AF, Wagner D, et al. Veterans Affairs intensive care unit risk  
25 adjustment model: validation, updating, recalibration. *Crit Care Med*. 2008;36:1031-42.
- 26 [14] Render ML, Freyberg RW, Hasselbeck R, Hofer TP, Sales AE, Deddens J, et al. Infrastructure for quality  
27 transformation: measurement and reporting in veterans administration intensive care units. *BMJ Qual Saf*. 2011;20:498-  
28 507.
- 29 [15] Wang XQ, Vincent BM, Wiitala WL, Luginbill KA, Viglianti EM, Prescott HC, et al. Veterans Affairs patient database  
30 (VAPD 2014-2017): building nationwide granular data for clinical discovery. *BMC Med Res Methodol*. 2019;19:94.
- 31 [16] McDonald CJ, Huff SM, Suico JG, Hill G, Leavelle D, Aller R, et al. LOINC, a universal standard for identifying  
32 laboratory observations: a 5-year update. *Clin Chem*. 2003;49:624-33.
- 33 [17] Forrey AW, McDonald CJ, DeMoor G, Huff SM, Leavelle D, Leland D, et al. Logical observation identifier names and  
34 codes (LOINC) database: a public use set of codes and names for electronic reporting of clinical laboratory test results.  
35 *Clin Chem*. 1996;42:81-90.
- 36 [18] van Walraven C, Austin PC, Jennings A, Quan H, Forster AJ. A modification of the Elixhauser comorbidity measures  
37 into a point system for hospital death using administrative data. *Med Care*. 2009;47:626-33.
- 38 [19] HCUP-US Tools & Software Page. 2019.
- 39 [20] Hooper TI, Gackstetter GD, Leardmann CA, Boyko EJ, Pearse LA, Smith B, et al. Early mortality experience in a large  
40 military cohort and a comparison of mortality data sources. *Popul Health Metr*. 2010;8:15.
- 41 [21] Prescott HC, Kepreos KM, Wiitala WL, Iwashyna TJ. Temporal Changes in the Influence of Hospitals and Regional  
42 Healthcare Networks on Severe Sepsis Mortality. *Crit Care Med*. 2015;43:1368-74.
- 43 [22] Breiman L. Classification and regression trees. New York, NY: Chapman & Hall; 1993.
- 44 [23] Breiman L. Random Forests. *Machine Learning*. 2001;45:5-32.
- 45 [24] Omidvar O, Dayhoff JE, ScienceDirect (Online service). Neural networks and pattern recognition. San Diego, Calif.:  
46 Academic Press; 1998.
- 47 [25] Pedregosa F, Varoquaux G, Gramfort A, Michel V, Thirion B, Grisel O, et al. Scikit-learn: Machine learning in Python.  
48 *Journal of machine learning research*. 2011;12:2825-30.

- 1 [26] Waljee AK, Mukherjee A, Singal AG, Zhang Y, Warren J, Balis U, et al. Comparison of imputation methods for missing  
laboratory data in medicine. *BMJ Open*. 2013;3.
- 2 [27] Stekhoven DJ, Buhlmann P. MissForest--non-parametric missing value imputation for mixed-type data.  
3 *Bioinformatics*. 2012;28:112-8.
- 4 [28] Geurts P, Ernst D, Wehenkel L. Extremely randomized trees. *Machine Learning*. 2006;63:3-42.
- 5 [29] Maree R, Geurts P, Wehenkel L. Random subwindows and extremely randomized trees for image classification in  
6 cell biology. *BMC Cell Biol*. 2007;8 Suppl 1:S2.
- 7 [30] Hastie T, Friedman J, Tibshirani R, SpringerLink (Online service). *The Elements of Statistical Learning Data Mining,  
8 Inference, and Prediction*. New York, NY: Springer New York : Imprint: Springer; 2001.
- 9 [31] Knaus WA, Zimmerman JE, Wagner DP, Draper EA, Lawrence DE. APACHE-acute physiology and chronic health  
10 evaluation: a physiologically based classification system. *Crit Care Med*. 1981;9:591-7.
- 11 [32] Allison PD, Sage Publications. *Missing data*. Thousand Oaks, [Calif.] ; London: SAGE; 2002. p. 1 online resource (vi, 91  
12 p.).
- 13 [33] Louppe G, Wehenkel L, Suter A, Geurts P. Understanding variable importances in forests of randomized trees.  
14 *Proceedings of the 26th International Conference on Neural Information Processing Systems - Volume 1*. Lake Tahoe,  
15 Nevada: Curran Associates Inc.; 2013. p. 431-9.
- 16 [34] Friedman JH. Greedy Function Approximation: A Gradient Boosting Machine. *The Annals of Statistics*. 2001;29:1189-  
17 232.
- 18 [35] Agniel D, Kohane IS, Weber GM. Biases in electronic health record data due to processes within the healthcare  
19 system: retrospective observational study. *BMJ*. 2018;361:k1479.
- 20 [36] Wiitala WL, Vincent BM, Burns JA, Prescott HC, Waljee AK, Cohen GR, et al. Variation in Laboratory Test Naming  
21 Conventions in EHRs Within and Between Hospitals: A Nationwide Longitudinal Study. *Med Care*. 2019;57:e22-e7.
- 22 [37] Zimmerman JE, Kramer AA, McNair DS, Malila FM. Acute Physiology and Chronic Health Evaluation (APACHE) IV:  
23 hospital mortality assessment for today's critically ill patients. *Crit Care Med*. 2006;34:1297-310.
- 24  
25  
26  
27  
28  
29  
30  
31  
32  
33  
34  
35  
36  
37  
38  
39  
40  
41  
42  
43  
44  
45  
46  
47  
48  
49  
50  
51  
52  
53  
54  
55  
56  
57  
58  
59  
60

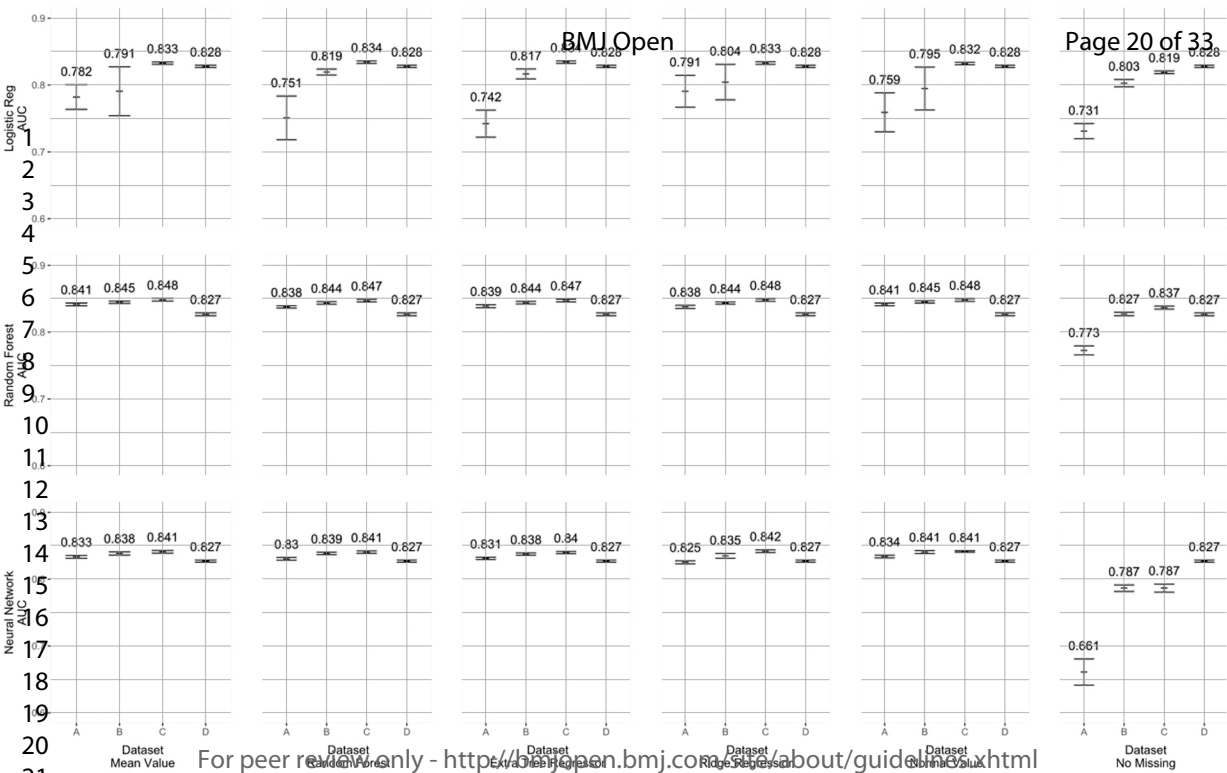

For peer review only - <http://open.bmj.com/https://about.jstor.org/terms>

Figure 1: AUC Scores Full Model

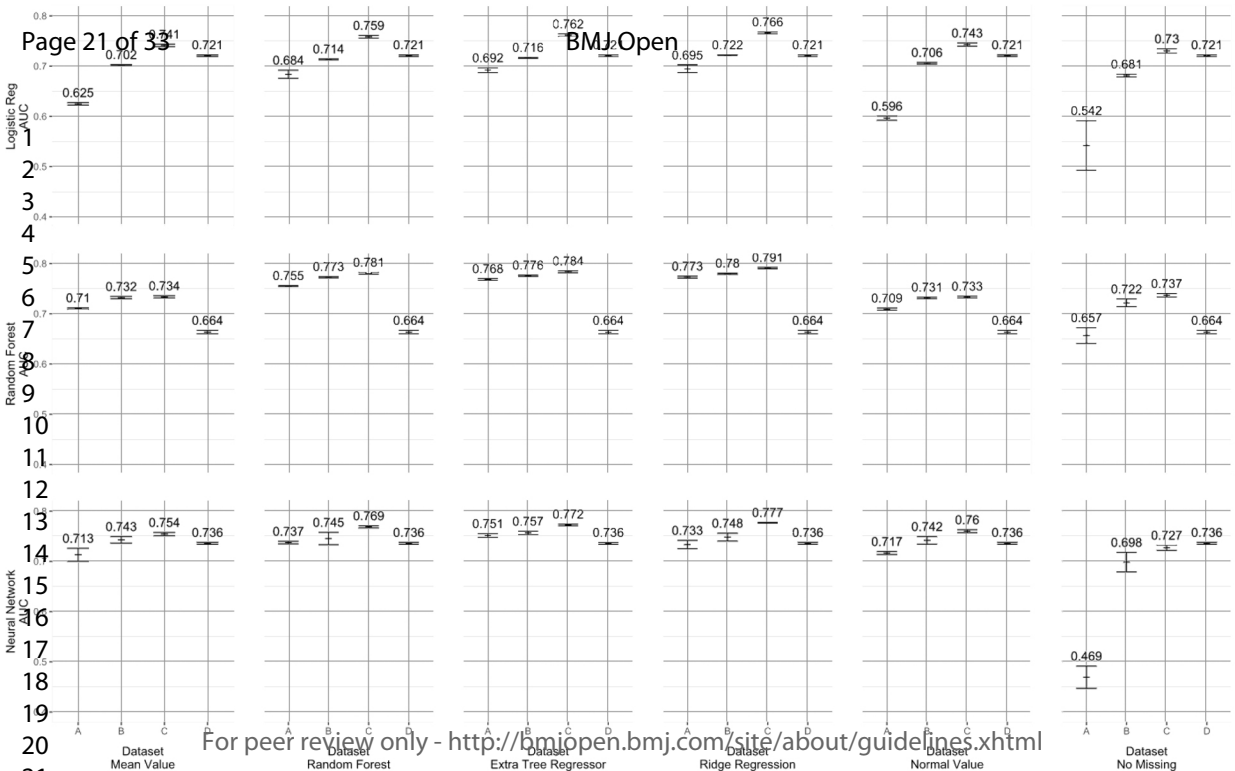

For peer review only - <http://bmjopen.bmj.com/site/about/guidelines.xhtml>

Figure 2: AUC Scores for Lab-Only Predictors

Dataset A

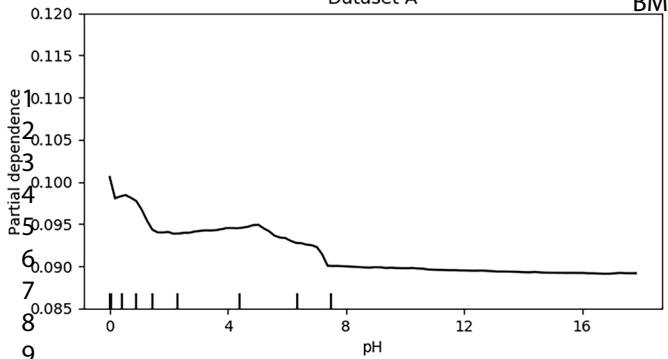

Dataset B

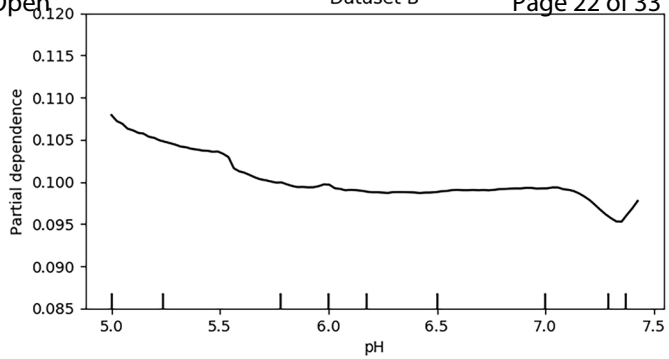

Dataset C

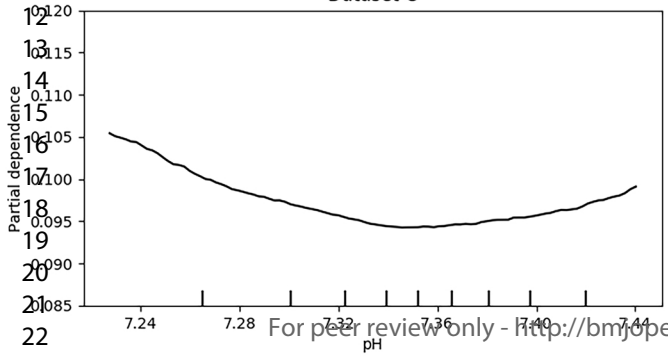

Dataset D

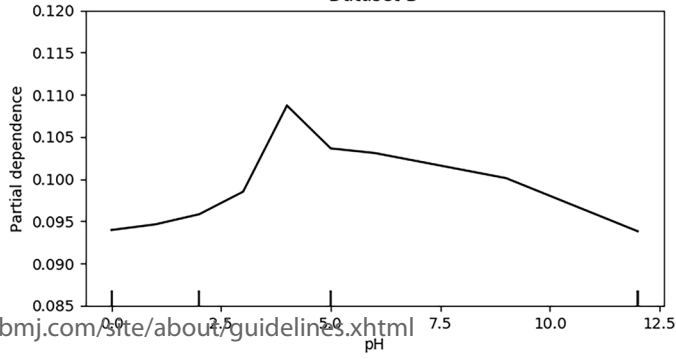

For peer review only - <http://bmjopen.bmj.com/site/about/guidelines.xhtml>

Figure 3: Partial Dependence Plots for pH



Dataset A

BMJ Open

Dataset B

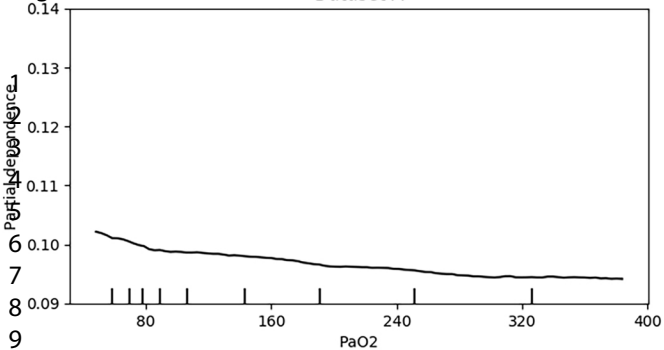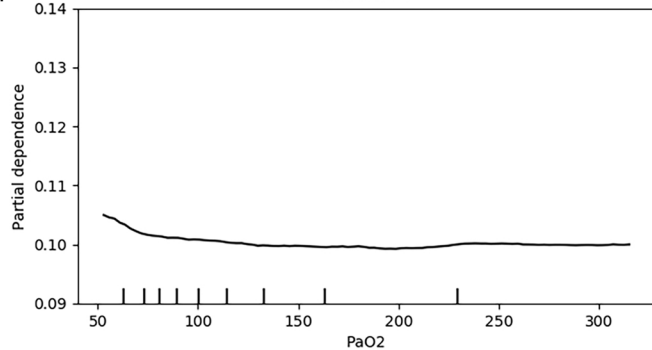

Dataset C

Dataset D

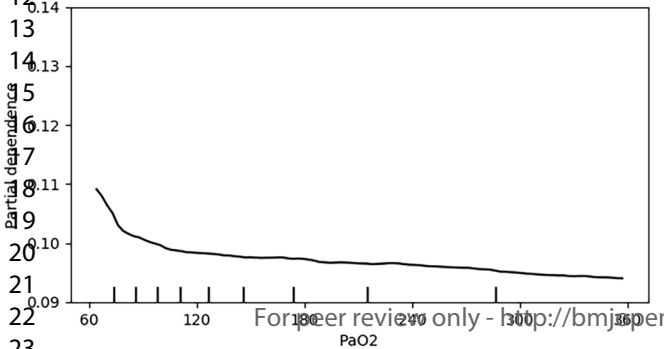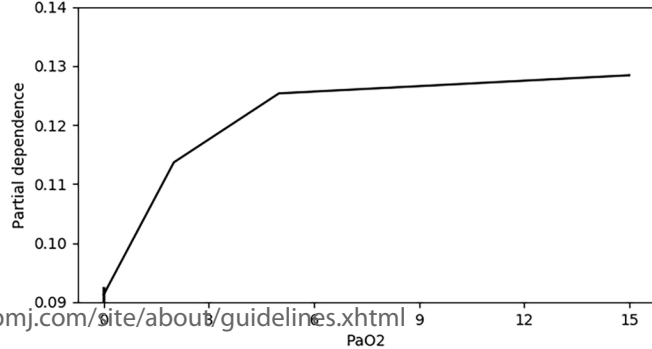

For peer review only - <http://bmjopen.bmj.com/site/about/guidelines.xhtml>

Figure 4: Partial Dependence Plots PaO2

1  
2  
3 **Appendix A.** Patient-level variables included in models  
4  
5  
6

7  
8  
9  
10  
11  
12  
13  
14  
15  
16  
17  
18  
19  
20  
21  
22  
23  
24  
25  
26  
27  
28  
29  
30  
31  
32  
33  
34  
35  
36  
37  
38  
39  
40  
41  
42  
43  
44  
45  
46  
47  
48  
49  
50  
51  
52  
53  
54  
55  
56  
57  
58  
59  
60

|                                                  |                                                                                                                                                                                                                                                                                                                                                                                                                                                                                                                                                                                                                                                                                                                                                                                                                                                                                                                                                                                                                                                                                                                                                                                                                                                                  |
|--------------------------------------------------|------------------------------------------------------------------------------------------------------------------------------------------------------------------------------------------------------------------------------------------------------------------------------------------------------------------------------------------------------------------------------------------------------------------------------------------------------------------------------------------------------------------------------------------------------------------------------------------------------------------------------------------------------------------------------------------------------------------------------------------------------------------------------------------------------------------------------------------------------------------------------------------------------------------------------------------------------------------------------------------------------------------------------------------------------------------------------------------------------------------------------------------------------------------------------------------------------------------------------------------------------------------|
| Demographics                                     | Gender, Age, Race (White, Black or African American, Asian, Native Hawaiian or other Pacific Islander, Unknown), Hispanic ethnicity                                                                                                                                                                                                                                                                                                                                                                                                                                                                                                                                                                                                                                                                                                                                                                                                                                                                                                                                                                                                                                                                                                                              |
| Comorbidities, included in Elixhauser            | Hypertension, Congestive Heart Failure, Cardiac Arrhythmia, Valvular Disease, Pulmonary Circulation Disorders, Peripheral Vascular Disorders, Paralysis, Other Neurological Disorders, Chronic Pulmonary Disease, Diabetes Uncomplicated, Diabetes Complicated, Hypothyroidism, Renal Failure, Liver Disease, Peptic Ulcer Disease excluding bleeding, AIDS/HIV, Lymphoma, Metastatic Cancer, Solid Tumor without Metastasis, Rheumatoid Arthritis/Collagen, Coagulopathy, Obesity, Weight Loss, Fluid and Electrolyte Disorders, Blood Loss Anemia, Deficiency Anemia, Alcohol Abuse, Drug Abuse, Psychoses, Depression                                                                                                                                                                                                                                                                                                                                                                                                                                                                                                                                                                                                                                         |
| Diagnoses, HCUP CCS single-level and multi-level | <p>Top 20 most frequent single-level CCS diagnoses:<br/>Congestive Heart Failure (non-hypertensive), Non-specific Chest Pain, Coronary Atherosclerosis and Other Heart Disease, Cardiac Dysrhythmias, Alcohol-related Disorders, Septicemia (except in labor), Chronic Obstructive Pulmonary Disease and Bronchiectasis, Pneumonia, Skin and Subcutaneous Tissue Infections, Osteoarthritis, Complication of Device (implant or graft), Complications of Surgical Procedures or Medical Care, Diabetes Mellitus with Complications, Respiratory Failure, Urinary Tract Infections, Renal Failure, Spondylosis, Acute Myocardial Infarction, Fluid and Electrolyte Disorders, Gastrointestinal Hemorrhage</p> <p>18 level 1 multi-level CCS categories:<br/>Infectious and Parasitic Diseases, Neoplasms, Endocrine Disorders, Anemia, Mental Illness, Diseases of the Nervous System, Diseases of the Circulatory System, Diseases of the Respiratory System, Diseases of the Digestive System, Diseases of the Genitourinary System, Complications of Pregnancy or Childbirth, Skin Disease, Diseases of the Musculoskeletal System, Congenital Anomalies, Perinatal Conditions, Injury and Poisoning, Other Health Status Conditions, Other Residual Codes</p> |
| Laboratory values                                | Albumin, Bilirubin, Blood Urea Nitrogen, Creatinine, Glucose, Hematocrit, Partial pressure of oxygen score, pH score, Sodium, White Blood Cell                                                                                                                                                                                                                                                                                                                                                                                                                                                                                                                                                                                                                                                                                                                                                                                                                                                                                                                                                                                                                                                                                                                   |

1  
2  
3  
4  
5  
6  
7  
8  
9  
10  
11  
12  
13  
14  
15  
16  
17  
18  
19  
20  
21  
22  
23  
24  
25  
26  
27  
28  
29  
30  
31  
32  
33  
34  
35  
36  
37  
38  
39  
40  
41  
42  
43  
44  
45  
46  
47

Appendix B

Table B.1: Model Performances (Full Model)

| Classification Method | Dataset | Imputation Method      | AUROC (95%CI)   | Optimal Cutoff | Predicted Cases |          | Accurate Rate |          | Sensitivity | Specificity | Brier Score |
|-----------------------|---------|------------------------|-----------------|----------------|-----------------|----------|---------------|----------|-------------|-------------|-------------|
|                       |         |                        |                 |                | Death           | Survival | Death         | Survival |             |             |             |
| Logistic Regression   | A       | Mean Value             | 0.78(0.76-0.80) | 0.48           | 37199           | 69549    | 0.21          | 0.96     | 0.74        | 0.69        | 0.19        |
| Logistic Regression   | B       | Mean Value             | 0.79(0.75-0.83) | 0.46           | 34915           | 71833    | 0.24          | 0.97     | 0.80        | 0.72        | 0.17        |
| Logistic Regression   | C       | Mean Value             | 0.83(0.83-0.83) | 0.46           | 35970           | 70778    | 0.23          | 0.97     | 0.79        | 0.71        | 0.17        |
| Logistic Regression   | A       | Random Forest          | 0.75(0.72-0.78) | 0.49           | 39528           | 67220    | 0.18          | 0.95     | 0.69        | 0.66        | 0.21        |
| Logistic Regression   | B       | Random Forest          | 0.82(0.82-0.82) | 0.49           | 31996           | 74752    | 0.25          | 0.97     | 0.77        | 0.75        | 0.17        |
| Logistic Regression   | C       | Random Forest          | 0.83(0.83-0.84) | 0.46           | 36017           | 70731    | 0.23          | 0.97     | 0.79        | 0.71        | 0.17        |
| Logistic Regression   | A       | Extra Trees Regression | 0.74(0.72-0.76) | 0.46           | 45762           | 60986    | 0.17          | 0.96     | 0.74        | 0.61        | 0.21        |
| Logistic Regression   | B       | Extra Trees Regression | 0.82(0.81-0.82) | 0.47           | 33642           | 73106    | 0.25          | 0.97     | 0.79        | 0.74        | 0.17        |
| Logistic Regression   | C       | Extra Trees Regression | 0.83(0.83-0.84) | 0.47           | 34579           | 72169    | 0.24          | 0.97     | 0.78        | 0.73        | 0.17        |
| Logistic Regression   | A       | Ridge Regression       | 0.79(0.77-0.82) | 0.46           | 38579           | 68169    | 0.21          | 0.97     | 0.78        | 0.68        | 0.18        |
| Logistic Regression   | B       | Ridge Regression       | 0.80(0.78-0.83) | 0.46           | 35034           | 71714    | 0.24          | 0.97     | 0.80        | 0.72        | 0.17        |

|                     |   |                  |                 |      |       |       |      |      |      |      |      |
|---------------------|---|------------------|-----------------|------|-------|-------|------|------|------|------|------|
| Logistic Regression | C | Ridge Regression | 0.83(0.83-0.84) | 0.47 | 35220 | 71528 | 0.23 | 0.97 | 0.78 | 0.72 | 0.17 |
| Logistic Regression | A | Normal Value     | 0.76(0.73-0.79) | 0.50 | 37392 | 69356 | 0.18 | 0.95 | 0.63 | 0.68 | 0.22 |
| Logistic Regression | B | Normal Value     | 0.80(0.76-0.83) | 0.50 | 30977 | 75771 | 0.26 | 0.97 | 0.76 | 0.76 | 0.17 |
| Logistic Regression | C | Normal Value     | 0.83(0.83-0.83) | 0.46 | 35676 | 71072 | 0.23 | 0.97 | 0.78 | 0.72 | 0.17 |
| Logistic Regression | A | No Missing       | 0.73(0.72-0.74) | 0.43 | 37658 | 69090 | 0.18 | 0.95 | 0.66 | 0.68 | 0.18 |
| Logistic Regression | B | No Missing       | 0.8(0.80-0.81)  | 0.42 | 33153 | 73595 | 0.24 | 0.97 | 0.76 | 0.74 | 0.14 |
| Logistic Regression | C | No Missing       | 0.82(0.82-0.82) | 0.44 | 35333 | 71415 | 0.22 | 0.96 | 0.76 | 0.72 | 0.16 |
| Logistic Regression | D | None             | 0.83(0.83-0.83) | 0.47 | 34184 | 72564 | 0.24 | 0.97 | 0.78 | 0.73 | 0.17 |
| Random Forest       | A | Mean Value       | 0.84(0.84-0.84) | 0.12 | 32330 | 74418 | 0.26 | 0.97 | 0.79 | 0.75 | 0.07 |
| Random Forest       | B | Mean Value       | 0.85(0.84-0.85) | 0.11 | 32642 | 74106 | 0.26 | 0.97 | 0.80 | 0.75 | 0.07 |
| Random Forest       | C | Mean Value       | 0.85(0.85-0.85) | 0.11 | 33548 | 73200 | 0.25 | 0.97 | 0.81 | 0.74 | 0.07 |
| Random Forest       | A | Random Forest    | 0.84(0.84-0.84) | 0.12 | 32659 | 74089 | 0.25 | 0.97 | 0.78 | 0.75 | 0.07 |
| Random Forest       | B | Random Forest    | 0.84(0.84-0.85) | 0.11 | 34093 | 72655 | 0.25 | 0.97 | 0.81 | 0.73 | 0.07 |

1  
2  
3  
4  
5  
6  
7  
8  
9  
10  
11  
12  
13  
14  
15  
16  
17  
18  
19  
20  
21  
22  
23  
24  
25  
26  
27  
28  
29  
30  
31  
32  
33  
34  
35  
36  
37  
38  
39  
40  
41  
42  
43  
44  
45  
46  
47

|               |   |                        |                 |      |       |       |      |      |      |      |      |
|---------------|---|------------------------|-----------------|------|-------|-------|------|------|------|------|------|
| Random Forest | C | Random Forest          | 0.85(0.85-0.85) | 0.11 | 33029 | 73719 | 0.25 | 0.97 | 0.80 | 0.74 | 0.07 |
| Random Forest | A | Extra Trees Regression | 0.84(0.84-0.84) | 0.11 | 32938 | 73810 | 0.25 | 0.97 | 0.79 | 0.74 | 0.07 |
| Random Forest | B | Extra Trees Regression | 0.84(0.84-0.85) | 0.12 | 32411 | 74337 | 0.26 | 0.97 | 0.80 | 0.75 | 0.07 |
| Random Forest | C | Extra Trees Regression | 0.85(0.85-0.85) | 0.11 | 33567 | 73181 | 0.25 | 0.97 | 0.80 | 0.74 | 0.07 |
| Random Forest | A | Ridge Regression       | 0.84(0.45-0.84) | 0.11 | 34587 | 72161 | 0.24 | 0.97 | 0.80 | 0.73 | 0.07 |
| Random Forest | B | Ridge Regression       | 0.84(0.84-0.85) | 0.12 | 31643 | 75105 | 0.26 | 0.97 | 0.79 | 0.76 | 0.07 |
| Random Forest | C | Ridge Regression       | 0.85(0.85-0.85) | 0.12 | 32531 | 74217 | 0.25 | 0.97 | 0.79 | 0.75 | 0.07 |
| Random Forest | A | Normal Value           | 0.84(0.84-0.84) | 0.12 | 31234 | 75514 | 0.26 | 0.97 | 0.78 | 0.76 | 0.07 |
| Random Forest | B | Normal Value           | 0.85(0.84-0.85) | 0.11 | 32711 | 74037 | 0.26 | 0.97 | 0.80 | 0.75 | 0.07 |
| Random Forest | C | Normal Value           | 0.85(0.85-0.85) | 0.12 | 31159 | 75589 | 0.26 | 0.97 | 0.78 | 0.76 | 0.07 |
| Random Forest | A | No Missing             | 0.77(0.77-0.78) | 0.18 | 36332 | 70416 | 0.20 | 0.96 | 0.71 | 0.70 | 0.08 |
| Random Forest | B | No Missing             | 0.83(0.82-0.83) | 0.16 | 31836 | 74912 | 0.25 | 0.97 | 0.77 | 0.75 | 0.07 |
| Random Forest | C | No Missing             | 0.84(0.83-0.84) | 0.16 | 34517 | 72231 | 0.24 | 0.97 | 0.78 | 0.73 | 0.08 |

|                |   |                        |                 |      |       |       |      |      |      |      |      |
|----------------|---|------------------------|-----------------|------|-------|-------|------|------|------|------|------|
| Random Forest  | D | None                   | 0.83(0.83-0.83) | 0.11 | 33407 | 73341 | 0.24 | 0.97 | 0.77 | 0.74 | 0.07 |
| Neural Network | A | Mean Value             | 0.83(0.83-0.84) | 0.53 | 35031 | 71717 | 0.24 | 0.97 | 0.80 | 0.72 | 0.19 |
| Neural Network | B | Mean Value             | 0.84(0.84-0.84) | 0.52 | 32716 | 74032 | 0.25 | 0.97 | 0.79 | 0.75 | 0.17 |
| Neural Network | C | Mean Value             | 0.84(0.84-0.84) | 0.53 | 32549 | 74199 | 0.25 | 0.97 | 0.79 | 0.75 | 0.17 |
| Neural Network | A | Random Forest          | 0.83(0.83-0.83) | 0.55 | 32515 | 74233 | 0.25 | 0.97 | 0.77 | 0.75 | 0.19 |
| Neural Network | B | Random Forest          | 0.84(0.84-0.84) | 0.57 | 30842 | 75906 | 0.26 | 0.97 | 0.77 | 0.76 | 0.18 |
| Neural Network | C | Random Forest          | 0.84(0.84-0.84) | 0.55 | 34144 | 72604 | 0.24 | 0.97 | 0.79 | 0.73 | 0.18 |
| Neural Network | A | Extra Trees Regression | 0.83(0.83-0.83) | 0.50 | 37351 | 69397 | 0.23 | 0.97 | 0.82 | 0.70 | 0.19 |
| Neural Network | B | Extra Trees Regression | 0.84(0.84-0.84) | 0.54 | 33529 | 73219 | 0.25 | 0.97 | 0.80 | 0.74 | 0.18 |
| Neural Network | C | Extra Trees Regression | 0.84(0.84-0.84) | 0.49 | 33324 | 73424 | 0.25 | 0.97 | 0.79 | 0.74 | 0.16 |
| Neural Network | A | Ridge Regression       | 0.83(0.82-0.83) | 0.51 | 33864 | 72884 | 0.24 | 0.97 | 0.78 | 0.73 | 0.17 |
| Neural Network | B | Ridge Regression       | 0.84(0.83-0.84) | 0.52 | 31186 | 75562 | 0.26 | 0.97 | 0.78 | 0.76 | 0.17 |
| Neural Network | C | Ridge Regression       | 0.84(0.84-0.84) | 0.55 | 32145 | 74603 | 0.25 | 0.97 | 0.78 | 0.75 | 0.18 |

1  
2  
3  
4  
5  
6  
7  
8  
9  
10  
11  
12  
13  
14  
15  
16  
17  
18  
19  
20  
21  
22  
23  
24  
25  
26  
27  
28  
29  
30  
31  
32  
33  
34  
35  
36  
37  
38  
39  
40  
41  
42  
43  
44  
45  
46  
47

|                |   |              |                 |      |       |       |      |      |      |      |      |
|----------------|---|--------------|-----------------|------|-------|-------|------|------|------|------|------|
| Neural Network | A | Normal Value | 0.83(0.83-0.84) | 0.58 | 31675 | 75073 | 0.25 | 0.97 | 0.77 | 0.76 | 0.19 |
| Neural Network | B | Normal Value | 0.84(0.84-0.84) | 0.45 | 35026 | 71722 | 0.24 | 0.97 | 0.81 | 0.72 | 0.16 |
| Neural Network | C | Normal Value | 0.84(0.84-0.84) | 0.55 | 32864 | 73884 | 0.25 | 0.97 | 0.79 | 0.75 | 0.18 |
| Neural Network | A | No Missing   | 0.66(0.64-0.68) | 0.76 | 49011 | 57737 | 0.14 | 0.94 | 0.65 | 0.56 | 0.50 |
| Neural Network | B | No Missing   | 0.79(0.78-0.79) | 0.59 | 32676 | 74072 | 0.23 | 0.96 | 0.71 | 0.74 | 0.21 |
| Neural Network | C | No Missing   | 0.79(0.78-0.79) | 0.59 | 38619 | 68129 | 0.20 | 0.96 | 0.75 | 0.68 | 0.24 |
| Neural Network | D | None         | 0.83(0.83-0.83) | 0.52 | 33760 | 72988 | 0.24 | 0.97 | 0.78 | 0.73 | 0.18 |

Table B.2: Model Performance (Using only lab variables)

| Classification Method | Dataset | Imputation Method      | AUROC (95%CI)   | Optimal Cutoff | Predicted Cases |          | Accurate Rate |          | Sensitivity | Specificity | Brier Score |
|-----------------------|---------|------------------------|-----------------|----------------|-----------------|----------|---------------|----------|-------------|-------------|-------------|
|                       |         |                        |                 |                | Death           | Survival | Death         | Survival |             |             |             |
| Logistic Regression   | A       | Mean Value             | 0.63(0.62-0.63) | 0.50           | 32327           | 74421    | 0.16          | 0.93     | 0.50        | 0.72        | 0.24        |
| Logistic Regression   | B       | Mean Value             | 0.70(0.70-0.70) | 0.47           | 33350           | 73398    | 0.21          | 0.95     | 0.66        | 0.73        | 0.20        |
| Logistic Regression   | C       | Mean Value             | 0.74(0.74-0.74) | 0.47           | 35248           | 71500    | 0.19          | 0.95     | 0.62        | 0.70        | 0.22        |
| Logistic Regression   | A       | Random Forest          | 0.68(0.68-0.69) | 0.48           | 39566           | 67182    | 0.17          | 0.94     | 0.63        | 0.66        | 0.23        |
| Logistic Regression   | B       | Random Forest          | 0.71(0.71-0.71) | 0.45           | 37758           | 68990    | 0.20          | 0.96     | 0.71        | 0.69        | 0.20        |
| Logistic Regression   | C       | Random Forest          | 0.76(0.76-0.76) | 0.47           | 38421           | 68327    | 0.18          | 0.95     | 0.66        | 0.67        | 0.21        |
| Logistic Regression   | A       | Extra Trees Regression | 0.69(0.69-0.70) | 0.46           | 43607           | 63141    | 0.17          | 0.95     | 0.69        | 0.62        | 0.22        |
| Logistic Regression   | B       | Extra Trees Regression | 0.72(0.72-0.72) | 0.44           | 39295           | 67453    | 0.20          | 0.96     | 0.73        | 0.67        | 0.19        |
| Logistic Regression   | C       | Extra Trees Regression | 0.76(0.76-0.76) | 0.45           | 42675           | 64073    | 0.17          | 0.95     | 0.71        | 0.63        | 0.21        |
| Logistic Regression   | A       | Ridge Regression       | 0.70(0.69-0.70) | 0.47           | 42514           | 64234    | 0.17          | 0.95     | 0.69        | 0.63        | 0.22        |
| Logistic Regression   | B       | Ridge Regression       | 0.72(0.72-0.72) | 0.44           | 39856           | 66892    | 0.20          | 0.96     | 0.75        | 0.67        | 0.19        |



1  
2  
3  
4  
5  
6  
7  
8  
9  
10  
11  
12  
13  
14  
15  
16  
17  
18  
19  
20  
21  
22  
23  
24  
25  
26  
27  
28  
29  
30  
31  
32  
33  
34  
35  
36  
37  
38  
39  
40  
41  
42  
43  
44  
45  
46  
47

|                     |   |                  |                   |      |       |       |      |      |      |      |      |
|---------------------|---|------------------|-------------------|------|-------|-------|------|------|------|------|------|
| Logistic Regression | C | Ridge Regression | 0.77(0.76-0.77)   | 0.45 | 42737 | 64011 | 0.17 | 0.95 | 0.71 | 0.63 | 0.21 |
| Logistic Regression | A | Normal Value     | 0.60(0.59-0.60)   | 0.49 | 31990 | 74758 | 0.15 | 0.92 | 0.46 | 0.72 | 0.24 |
| Logistic Regression | B | Normal Value     | 0.71(0.70-0.71)   | 0.45 | 38325 | 68423 | 0.19 | 0.95 | 0.70 | 0.68 | 0.20 |
| Logistic Regression | C | Normal Value     | 0.74 (0.74-0.75)  | 0.46 | 41447 | 65301 | 0.17 | 0.95 | 0.68 | 0.64 | 0.22 |
| Logistic Regression | A | No Missing       | 0.54 (0.49-0.59)  | 0.57 | 17678 | 89070 | 0.15 | 0.91 | 0.25 | 0.84 | 0.27 |
| Logistic Regression | B | No Missing       | 0.68 n(0.68-0.68) | 0.45 | 32766 | 73982 | 0.20 | 0.95 | 0.64 | 0.73 | 0.19 |
| Logistic Regression | C | No Missing       | 0.73(0.73-0.73)   | 0.50 | 30965 | 75783 | 0.19 | 0.94 | 0.55 | 0.74 | 0.23 |
| Logistic Regression | D | None             | 0.72(0.72-0.72)   | 0.49 | 35766 | 70982 | 0.19 | 0.95 | 0.64 | 0.70 | 0.21 |
| Random Forest       | A | Mean Value       | 0.71(0.71-0.71)   | 0.09 | 46226 | 60522 | 0.17 | 0.95 | 0.73 | 0.60 | 0.09 |
| Random Forest       | B | Mean Value       | 0.73(0.73-0.73)   | 0.10 | 44628 | 62120 | 0.18 | 0.96 | 0.75 | 0.62 | 0.09 |
| Random Forest       | C | Mean Value       | 0.73(0.73-0.74)   | 0.10 | 44525 | 62223 | 0.18 | 0.96 | 0.75 | 0.62 | 0.09 |
| Random Forest       | A | Random Forest    | 0.76(0.75-0.76)   | 0.09 | 41715 | 65033 | 0.18 | 0.96 | 0.74 | 0.65 | 0.08 |
| Random Forest       | B | Random Forest    | 0.77(0.77-0.77)   | 0.10 | 38154 | 68594 | 0.20 | 0.96 | 0.75 | 0.69 | 0.08 |

|               |   |                        |                 |      |       |       |      |      |      |      |      |
|---------------|---|------------------------|-----------------|------|-------|-------|------|------|------|------|------|
| Random Forest | C | Random Forest          | 0.78(0.78-0.78) | 0.09 | 40709 | 66039 | 0.19 | 0.96 | 0.75 | 0.66 | 0.08 |
| Random Forest | A | Extra Trees Regression | 0.77(0.77-0.77) | 0.09 | 43230 | 63518 | 0.19 | 0.96 | 0.77 | 0.64 | 0.08 |
| Random Forest | B | Extra Trees Regression | 0.78(0.77-0.78) | 0.10 | 38734 | 68014 | 0.20 | 0.96 | 0.76 | 0.68 | 0.08 |
| Random Forest | C | Extra Trees Regression | 0.78(0.78-0.79) | 0.10 | 38810 | 67938 | 0.20 | 0.96 | 0.74 | 0.68 | 0.08 |
| Random Forest | A | Ridge Regression       | 0.77(0.77-0.78) | 0.10 | 39913 | 66835 | 0.20 | 0.96 | 0.75 | 0.67 | 0.08 |
| Random Forest | B | Ridge Regression       | 0.78(0.78-0.78) | 0.09 | 39663 | 67085 | 0.20 | 0.97 | 0.77 | 0.67 | 0.08 |
| Random Forest | C | Ridge Regression       | 0.79(0.79-0.79) | 0.09 | 40249 | 66499 | 0.20 | 0.96 | 0.76 | 0.66 | 0.08 |
| Random Forest | A | Normal Value           | 0.71(0.71-0.71) | 0.10 | 46047 | 60701 | 0.17 | 0.95 | 0.73 | 0.60 | 0.09 |
| Random Forest | B | Normal Value           | 0.73(0.73-0.73) | 0.10 | 44400 | 62348 | 0.18 | 0.96 | 0.75 | 0.62 | 0.09 |
| Random Forest | C | Normal Value           | 0.73(0.73-0.74) | 0.09 | 46774 | 59974 | 0.17 | 0.96 | 0.77 | 0.60 | 0.09 |
| Random Forest | A | No Missing             | 0.66(0.64-0.67) | 0.26 | 20159 | 86589 | 0.21 | 0.93 | 0.40 | 0.83 | 0.10 |
| Random Forest | B | No Missing             | 0.72(0.71-0.73) | 0.14 | 52201 | 54547 | 0.16 | 0.96 | 0.78 | 0.54 | 0.08 |
| Random Forest | C | No Missing             | 0.74(0.73-0.74) | 0.21 | 26193 | 80555 | 0.22 | 0.94 | 0.55 | 0.79 | 0.09 |

1  
2  
3  
4  
5  
6  
7  
8  
9  
10  
11  
12  
13  
14  
15  
16  
17  
18  
19  
20  
21  
22  
23  
24  
25  
26  
27  
28  
29  
30  
31  
32  
33  
34  
35  
36  
37  
38  
39  
40  
41  
42  
43  
44  
45  
46  
47

|                |   |                        |                 |      |       |       |      |      |      |      |      |
|----------------|---|------------------------|-----------------|------|-------|-------|------|------|------|------|------|
| Random Forest  | D | None                   | 0.66(0.66-0.67) | 0.45 | 33868 | 72880 | 0.18 | 0.94 | 0.57 | 0.71 | 0.18 |
| Neural Network | A | Mean Value             | 0.71(0.70-0.73) | 0.47 | 33169 | 73579 | 0.19 | 0.94 | 0.60 | 0.72 | 0.19 |
| Neural Network | B | Mean Value             | 0.74(0.74-0.75) | 0.49 | 31171 | 75577 | 0.21 | 0.95 | 0.63 | 0.75 | 0.19 |
| Neural Network | C | Mean Value             | 0.75(0.75-0.76) | 0.40 | 42096 | 64652 | 0.18 | 0.96 | 0.74 | 0.64 | 0.18 |
| Neural Network | A | Random Forest          | 0.74(0.74-0.74) | 0.50 | 37930 | 68818 | 0.19 | 0.95 | 0.68 | 0.68 | 0.19 |
| Neural Network | B | Random Forest          | 0.75(0.73-0.76) | 0.54 | 36554 | 70194 | 0.20 | 0.96 | 0.71 | 0.70 | 0.22 |
| Neural Network | C | Random Forest          | 0.77(0.77-0.77) | 0.42 | 42444 | 64304 | 0.18 | 0.96 | 0.74 | 0.64 | 0.18 |
| Neural Network | A | Extra Trees Regression | 0.75(0.75-0.76) | 0.42 | 44585 | 62163 | 0.18 | 0.96 | 0.76 | 0.62 | 0.18 |
| Neural Network | B | Extra Trees Regression | 0.76(0.75-0.76) | 0.46 | 40067 | 66681 | 0.20 | 0.96 | 0.75 | 0.67 | 0.19 |
| Neural Network | C | Extra Trees Regression | 0.77(0.77-0.77) | 0.48 | 39088 | 67660 | 0.19 | 0.96 | 0.71 | 0.67 | 0.20 |
| Neural Network | A | Ridge Regression       | 0.73(0.73-0.74) | 0.49 | 43129 | 63619 | 0.18 | 0.96 | 0.74 | 0.63 | 0.21 |
| Neural Network | B | Ridge Regression       | 0.75(0.74-0.76) | 0.44 | 39388 | 67360 | 0.20 | 0.96 | 0.74 | 0.67 | 0.18 |
| Neural Network | C | Ridge Regression       | 0.78(0.78-0.78) | 0.53 | 38048 | 68700 | 0.19 | 0.95 | 0.68 | 0.68 | 0.21 |

|                |   |              |                 |      |       |        |      |      |      |      |      |
|----------------|---|--------------|-----------------|------|-------|--------|------|------|------|------|------|
| Neural Network | A | Normal Value | 0.72(0.71-0.72) | 0.45 | 33193 | 73555  | 0.19 | 0.95 | 0.61 | 0.72 | 0.18 |
| Neural Network | B | Normal Value | 0.74(0.73-0.75) | 0.50 | 37560 | 69188  | 0.20 | 0.96 | 0.71 | 0.69 | 0.20 |
| Neural Network | C | Normal Value | 0.76(0.76-0.76) | 0.41 | 42187 | 64561  | 0.18 | 0.96 | 0.74 | 0.64 | 0.18 |
| Neural Network | A | No Missing   | 0.47(0.45-0.49) | 0.79 | 2628  | 104120 | 0.14 | 0.90 | 0.04 | 0.98 | 0.44 |
| Neural Network | B | No Missing   | 0.70(0.68-0.72) | 0.69 | 23720 | 83028  | 0.23 | 0.94 | 0.52 | 0.81 | 0.31 |
| Neural Network | C | No Missing   | 0.73(0.72-0.73) | 0.57 | 51077 | 55671  | 0.15 | 0.95 | 0.74 | 0.55 | 0.29 |
| Neural Network | D | None         | 0.74(0.73-0.74) | 0.50 | 36925 | 69823  | 0.19 | 0.95 | 0.67 | 0.69 | 0.21 |

# BMJ Open

## Variation in Model Performance by Data Cleanliness and Classification Methods in the Prediction of 30-day ICU Mortality, a US Nationwide Retrospective Cohort and Simulation Study

|                                 |                                                                                                                                                                                                                                                                                                                                                                                                                                                                                                                                                                                |
|---------------------------------|--------------------------------------------------------------------------------------------------------------------------------------------------------------------------------------------------------------------------------------------------------------------------------------------------------------------------------------------------------------------------------------------------------------------------------------------------------------------------------------------------------------------------------------------------------------------------------|
| Journal:                        | <i>BMJ Open</i>                                                                                                                                                                                                                                                                                                                                                                                                                                                                                                                                                                |
| Manuscript ID                   | bmjopen-2020-041421.R1                                                                                                                                                                                                                                                                                                                                                                                                                                                                                                                                                         |
| Article Type:                   | Original research                                                                                                                                                                                                                                                                                                                                                                                                                                                                                                                                                              |
| Date Submitted by the Author:   | 25-Aug-2020                                                                                                                                                                                                                                                                                                                                                                                                                                                                                                                                                                    |
| Complete List of Authors:       | Iwashyna, Theodore; University of Michigan, Internal Medicine; VA Center for Clinical Management Research, Ann Arbor VA Medical Center<br>Ma, Cheng; University of Michigan, Statistics<br>Wang, Xiao Qing; VA Center for Clinical Management Research, Ann Arbor VA Medical Center<br>Seelye, Sarah; VA Center for Clinical Management Research, Ann Arbor VA Medical Center<br>Zhu, Ji; University of Michigan, Department of Statistics<br>Waljee, Akbar; University of Michigan, Gastroenterology; VA Center for Clinical Management Research, Ann Arbor VA Medical Center |
| <b>Primary Subject Heading</b>: | Research methods                                                                                                                                                                                                                                                                                                                                                                                                                                                                                                                                                               |
| Secondary Subject Heading:      | Health services research, Health informatics                                                                                                                                                                                                                                                                                                                                                                                                                                                                                                                                   |
| Keywords:                       | Health informatics < BIOTECHNOLOGY & BIOINFORMATICS, STATISTICS & RESEARCH METHODS, Adult intensive & critical care < INTENSIVE & CRITICAL CARE                                                                                                                                                                                                                                                                                                                                                                                                                                |
|                                 |                                                                                                                                                                                                                                                                                                                                                                                                                                                                                                                                                                                |

SCHOLARONE™  
Manuscripts



I, the Submitting Author has the right to grant and does grant on behalf of all authors of the Work (as defined in the below author licence), an exclusive licence and/or a non-exclusive licence for contributions from authors who are: i) UK Crown employees; ii) where BMJ has agreed a CC-BY licence shall apply, and/or iii) in accordance with the terms applicable for US Federal Government officers or employees acting as part of their official duties; on a worldwide, perpetual, irrevocable, royalty-free basis to BMJ Publishing Group Ltd ("BMJ") its licensees and where the relevant Journal is co-owned by BMJ to the co-owners of the Journal, to publish the Work in this journal and any other BMJ products and to exploit all rights, as set out in our [licence](#).

The Submitting Author accepts and understands that any supply made under these terms is made by BMJ to the Submitting Author unless you are acting as an employee on behalf of your employer or a postgraduate student of an affiliated institution which is paying any applicable article publishing charge ("APC") for Open Access articles. Where the Submitting Author wishes to make the Work available on an Open Access basis (and intends to pay the relevant APC), the terms of reuse of such Open Access shall be governed by a Creative Commons licence – details of these licences and which [Creative Commons](#) licence will apply to this Work are set out in our licence referred to above.

Other than as permitted in any relevant BMJ Author's Self Archiving Policies, I confirm this Work has not been accepted for publication elsewhere, is not being considered for publication elsewhere and does not duplicate material already published. I confirm all authors consent to publication of this Work and authorise the granting of this licence.

**Title:** Variation in Model Performance by Data Cleanliness and Classification Methods in the Prediction of 30-day ICU Mortality, a US Nationwide Retrospective Cohort and Simulation Study

**Authors:**

Theodore J. Iwashyna\*, M.D., PhD (1,2,3)

Cheng Ma\*, B.S. (4)

Xiao Qing Wang, MPH (1)

Sarah Seelye, Ph.D. (1)

Ji Zhu, Ph.D. (4)

Akbar K. Waljee, M.D., M.Sc. (1,2,3)

\*considered co-first authors.

- 1) VA Center for Clinical Management Research, VA Ann Arbor Health Care System, Ann Arbor, MI, USA.
- 2) Department of Internal Medicine, Michigan Medicine, Ann Arbor, MI, USA.
- 3) Michigan Integrated Center for Health Analytics and Medical Prediction (MiCHAMP), Ann Arbor, MI, USA
- 4) Department of Statistics, University of Michigan, Ann Arbor, MI, USA.

**Address correspondence to:** Akbar K. Waljee, M.D. M.Sc., Associate Professor of Medicine, Division of Gastroenterology, Department of Internal Medicine, Michigan Medicine, Ann Arbor Veterans Affairs Medical Center, 2215 Fuller Road, 111D, Ann Arbor, Michigan 48105

Phone: 734-845-5865; Fax: 734-845-3091; E-mail: [awaljee@med.umich.edu](mailto:awaljee@med.umich.edu)

**Keywords:** missing data, risk prediction, machine learning, electronic health record data, random forests

**Word count:** 3,259

**ABSTRACT**

**Objective:** There has been a proliferation of approaches to statistical methods and missing data imputation as electronic health records become more plentiful; however, the relative performance on real-world problems is unclear.

**Materials and Methods:** Using 355,823 ICU hospitalizations at over 100 hospitals in the nationwide VA healthcare system (2014-2017), we systematically varied 3 approaches: how we extracted and cleaned physiologic variables; how we handled missing data (using mean value imputation, random forest, extremely randomized trees (extra-trees regression), ridge regression, normal value imputation, and case-wise deletion); and how we computed risk (using logistic regression, random forest, and neural networks). We applied these approaches in a 70% development sample and tested the results in an independent 30% testing sample. Area under the ROC Curve (AUROC) was used to quantify model discrimination.

**Results:** In 355,823 ICU stays, there were 34,867 deaths (9.8%) within 30 days of admission. The highest AUROC's obtained for each primary classification method were very similar: 0.83 (95% CI [0.83-0.83]) to 0.85 (95% CI 0.84-.0.85). Likewise, there was relatively little variation within classification method by the missing value imputation method used—except when case-wise deletion was applied for missing data.

**Conclusion:** Variation in discrimination was seen as a function of data cleanliness, with logistic regression suffering the most loss of discrimination in the least clean data. Losses in discrimination were not present in random forest and neural networks even in naively extracted data. Data from a large nationwide health system revealed interactions between missing data imputation techniques, data cleanliness, and classification methods for predicting 30-day mortality.



## STRENGTHS AND LIMITATIONS OF THIS STUDY

---

- This study focuses on a large, real world dataset consisting of 355,823 ICU stays at over 100 different facilities.
- Multiple methods of model fitting and missing data imputation were implemented in standardized ways that reflect common practice.
- The approach we used for each implementation is available in an Appendix or via GitHub to allow transparency and reproducibility, and we encourage validation on other datasets.
- Due to high dimensionality of method combinations, this study only considered one outcome, and only considered one standardized and decided upon an a priori approach within each dataset / categorization model / missingness imputation triad.

For peer review only

## INTRODUCTION

1  
2  
3 Risk adjustment plays an increasingly central role in the organization, care of, and science about critically ill patients[1, 2].  
4  
5 Statistical adjustment, including the handling of missing data, is essential for many performance measurements as well as  
6  
7 pay-for-performance and shared savings systems. It is used to stratify the care of patients for treatments and track quality  
8  
9 improvement efforts over time[3]. It is routinely measured, even in clinical trials, to assess confounder balance between  
10  
11 arms and may form part of RCT enrollment or drug approval criteria[4].  
12  
13  
14  
15

16  
17 As a result, there has been a proliferation of risk scores and missing data imputation tools both for the common task of  
18  
19 short-term mortality prediction and for more specialized tasks. Many statistical tools have been promoted. Rules of thumb  
20  
21 have developed and existed long enough to be critiqued[5-9]. The Transparent Reporting of a multivariable prediction  
22  
23 model for Individual Prognosis Or Diagnosis (TRIPOD) guidelines offer standardization of reporting[10]. Textbooks have  
24  
25 emerged[11]. Yet questions remain on fundamental pragmatic issues: How clean does the data have to be to prevent the  
26  
27 so-called “garbage in, garbage out (GIGO)” phenomenon? How sensitive are methods to missing data and how should it  
28  
29 be handled? Do these analytic decisions interact?  
30  
31  
32  
33

34  
35 To address such questions, we compared the performance of an array of methods on a single standardized problem—the  
36  
37 prediction of 30-day mortality based on demographics, day 1 laboratory results, comorbidities, and diagnoses among  
38  
39 patients admitted to the Intensive Care Unit (ICU) at any hospital in the nationwide Veterans Health Administration  
40  
41 system[12-14]. Using the same set of real ICU admissions, we systematically varied three parameters: the approach used  
42  
43 to extract and clean physiologic variables from the electronic health record; the approach used to handle missing data;  
44  
45 and the approach used to compute the risk. We systematically applied these approaches in a 70% development sample  
46  
47 and tested the results in an independent 30% testing sample, to provide real world comparisons to inform future  
48  
49 pragmatic implementation of risk scores.  
50  
51  
52  
53

## METHODS

## Cohort

Data were drawn from the Veterans Affairs Patient Database (VAPD), which contains daily patient physiology for acute hospitalizations between January 1, 2014 and December 31, 2017. The VAPD includes patient demographics, laboratory results, and diagnoses that are commonly used to predict 30-day mortality from the day of admission. Here, we included data from all ICU hospitalizations on day 1 of each hospitalization. Full details of the VAPD have been published elsewhere[15].

The development of this database was reviewed and approved by the VA Ann Arbor Healthcare System's Institutional Review Board.

Four versions of the dataset were created for each hospitalization on admission: A) raw lab values extracted using only lab test names, B) raw lab values extracted using only Logical Observation Identifiers Names and Codes (LOINC), C) cleaned lab values extracted using both LOINC[16, 17] and searched text lab test names, and D) cleaned lab values converted to Acute Physiology And Chronic Health Evaluation (APACHE) points, extracted using both LOINC and lab test names.

## No Patient and Public Involvement

This research was done without patient involvement. Patients were not invited to comment on the study design and were not consulted to develop patient relevant outcomes or interpret the results. Patients were not invited to contribute to the writing or editing of this document for readability or accuracy.

## Predictor Variables

In our primary analyses, we adjust for 10 laboratory values that were collected within one day of hospital admission. Further patient-level adjustments included demographic characteristics (gender, age, race, and Hispanic ethnicity), 30 comorbidities, and 38 primary diagnoses. The individual comorbidities used in models are defined by methods described in van Walraven's implementation of the Elixhauser comorbidity score[18]. We adjust for 38 primary diagnoses drawn from the Healthcare Cost and Utilization (HCUP) Clinical Classification Software (CCS)[19], which consist of the top 20 most frequent single-level CCS diagnoses and 18 level-one multi-level categories of diagnoses (Appendix A.) In secondary

1 analyses, to emphasize the role of data cleanliness, we estimate risk using *only* the laboratory values since the non-  
2 laboratory values do not vary in data cleanliness and curation.  
3  
4  
5  
6

### 7 **Outcome Variable: 30-day mortality**

8  
9 Our primary outcome variable is 30-day all-cause mortality, defined as death within 30 days of the admission date for the  
10 index hospitalization. Mortality is evaluated using the highly reliable Veterans Administration beneficiary death files which  
11 aggregate from multiple sources[12, 20, 21].  
12  
13  
14  
15  
16  
17

### 18 **Statistical Analysis and Model Development**

19  
20 Random Forests is an ensemble machine learning method that aggregates the results of multiple decision trees fit on  
21 bootstrap samples of the original data[22, 23]. For each decision tree, the original data are bootstrapped to create a new  
22 dataset of the same size and the tree is fit to the new data. Instead of considering all predictors to determine the splitting  
23 criterion at a node, the split variable is chosen from a random subset of variables in order to reduce the correlation  
24 between different trees. Many such trees are grown, creating a ‘forest’. Each observation is classified by each tree, and  
25 the majority classification over all trees is the predicted class. The ability of random forests to learn nonlinear and complex  
26 functions contributes to its predictive performance.  
27  
28  
29  
30  
31  
32  
33  
34  
35  
36  
37

38 The neural network[24] can “learn” to classify samples without manual designed task-specific rules. The algorithm applies  
39 different weights to predictors and uses these transformations in subsequent “layers” of the neural net, culminating in  
40 the output layer with predictions. We applied the random forest and the neural network on our task. A traditional logistic  
41 regression model was also performed and compared.  
42  
43  
44  
45  
46  
47  
48

49 Statistical analyses were performed with Python and the scikit-learn package[25].  
50  
51  
52  
53

### 54 **Training and Testing Sets**

55  
56  
57  
58  
59  
60

1 The dataset was randomly split into a 70% training set and a 30% testing set. The same split was used for all classification  
2 methods. This process was replicated five times (five different training sets and corresponding testing set were generated),  
3  
4 and each time the models were fit on the training set and used to predict the 30-day mortality of the testing set.  
5  
6  
7

## 9 **Missing Data and Imputation**

11 We imputed the missing values before training and testing the models, comparing:  
12

- 14 ● “Mean Value”: the mean value of each variable in the training set was used to replace missing values[26].
- 16 ● “Random Forest”: used random forest to impute missing values (missForest)[27].
- 18 ● “Extremely Randomized Trees (Extra-Trees Regression)”: this method is similar to random forest but is faster[28,  
20 29].
- 22 ● “Ridge Regression”: used Bayesian Ridge regression to impute missing values[30].
- 24 ● “Normal Value”[31]: normal values were used to impute missing values—this is common in clinical prediction  
26 contexts in which it is assumed that clinicians order tests they fear are not normal, and therefore the absence of  
28 such a test is a sign that the clinician reviewed other aspects of the patient’s case and judged the odds of  
30 physiologic abnormality so low that testing was not indicated.
- 32 ● “No Missing”: case-wise deletion[32].

## 39 **Variable Importance and Partial Dependence Plots**

41 Predictor variable importance was evaluated for random forests[33]. When classifying a sample using a decision tree, a  
42 predictor was used at each node. Predictors that appear more frequently and that reduce the misclassification more  
43 substantially are considered more important. By combining all trees in a random forest model, we assessed the variable  
44 importance of each predictor. Different values of the same predictor may have different effects on the prediction. We  
45 plotted the Partial Dependence Plots[30] to show how the value of predictors affects the prediction of 30-day mortality.  
46  
47  
48  
49  
50  
51  
52  
53 Partial dependence plots were used to visualize non-linearity among variables.  
54  
55  
56  
57  
58  
59  
60

## RESULTS

### Cohort Description

The cohort comprised 355,823 ICU hospitalizations at over 100 different hospitals, as described elsewhere[15]. The mean age of the cohort was 66.9 years, and there were 34,867 deaths within 30-days of admission, a primary outcome event rate of 9.8% (Table 1.)

**Table 1.** ICU Patient Demographics

| Variables                       | ICU Only Cohort |
|---------------------------------|-----------------|
| Hospitalizations, N             | 355,823         |
| Age, mean (SD), y               | 66.9 (11.6)     |
| Male, N (%)                     | 341,579 (96.0)  |
| Race, N (%)                     |                 |
| White                           | 256,293 (72.0)  |
| Black or African American       | 73,855 (20.8)   |
| Other                           | 25,675 (7.2)    |
| Hispanic, N (%)                 | 20,532 (5.8)    |
| 30-day Mortality, N (%)         | 34,867 (9.8)    |
| Length of Stay, mean (SD), days | 9.5 (13.0)      |

Rates of data missingness for each laboratory value in each dataset are shown in Table 2. Dataset A has a high proportion of missing laboratory values for blood urea nitrogen (0.84) and hematocrit (0.85) compared to datasets B and C. This is due to dataset A using a single, broad lab test name to identify laboratory values: “BUN” for blood urea nitrogen and “hematocrit” for hematocrit. In contrast, datasets B and C incorporated LOINC codes for BUN and HCT, which result in fewer missing laboratory values.

**Table 2.** Proportion of Labs Missing

| Dataset | Albumin (albval) | Bilirubin (bili) | Blood urea nitrogen (bun) | Creatinine (creat) | Glucose (glucose) | Hematocrit (hct) | Partial Pressure (pao2) | pH (pa) | Sodium (na) | White Blood Cell (wbc) |
|---------|------------------|------------------|---------------------------|--------------------|-------------------|------------------|-------------------------|---------|-------------|------------------------|
| A       | 0.39             | 0.42             | 0.84                      | 0.13               | 0.07              | 0.85             | 0.66                    | 0.14    | 0.11        | 0.13                   |
| B       | 0.38             | 0.42             | 0.13                      | 0.13               | 0.06              | 0.12             | 0.65                    | 0.44    | 0.11        | 0.13                   |
| C       | 0.39             | 0.45             | 0.13                      | 0.12               | 0.06              | 0.11             | 0.69                    | 0.64    | 0.11        | 0.13                   |

### Using all Data for Model Development

1 Figure 1 shows the AUC scores of different classification models and imputation methods in the primary analysis. The  
2 highest AUC's obtained for each primary classification method (rows of the figure: logistic regression, random forest, or a  
3 neural network) were very similar: AUC's of 0.83 to 0.85. Likewise, there was relatively little variation within classification  
4 method by the missing value imputation method used, be it mean value imputation, random forest, extremely randomized  
5 trees (extra-trees regression), ridge regression, or normal value imputation. All models suffered dramatic losses in  
6 discrimination when case-wise deletion was used for missing data in the least clean dataset (far right columns). Full model  
7 performance for each condition can be seen in Appendix B.  
8  
9  
10  
11  
12  
13  
14

15  
16  
17  
18 Variation in discrimination was seen, however, across classification methods, as a function of data cleanliness. (Note that  
19 the analyst was blinded during the analysis to how each dataset was developed, and hence did not know which was  
20 "cleanest"). In the logistic regression model developed using the least clean data (dataset A had raw lab values extracted  
21 using only lab test names), performance was always lower than the performance with the more complete and clean  
22 datasets—by AUC's of 0.05 to about 0.1,  $p$ -value < 0.05). Similarly, performance in dataset B (extracted using LOINC codes  
23 without unit standardization) was lower and more unstable for mean value imputation and ridge regression. In marked  
24 contrast, neither random forests nor neural networks showed such reduced performance when developed in less clean  
25 data—in no case did the AUC degradations exceed 0.025 despite similar optimal performance.  
26  
27  
28  
29  
30  
31  
32  
33  
34  
35  
36  
37

### 38 **Secondary Analysis Using only Laboratory Values**

39  
40 The primary analysis presented above considers the real world case in which demographics, diagnoses, and laboratory  
41 values are used in combination with risk model prediction. Yet, of these, only laboratory values were subject to variation  
42 in cleanliness. We, therefore, conducted a secondary analysis using only laboratory values to assess more clearly the  
43 impact of data quality. Results are shown in Figure 2.  
44  
45  
46  
47  
48  
49  
50

51 Average model performance with this much smaller group of predictors is, as expected, somewhat lower with less data—  
52 optimal AUC's typically range from 0.73 to 0.78 across combinations of classification model and missing data imputation.  
53  
54 No uniformly superior strategy is evident, save markedly lower performance of case-wise deletion in the least clean  
55  
56  
57  
58  
59

dataset (A). As before, logistic regression shows markedly reduced discrimination when developed in the least clean data set. Neural networks show consistent performance.

Also notable is the marked reduction of discrimination of random forest models and neural network models regardless of the missing data imputation model used within dataset D. Dataset D has the “cleanest” data, in that it has hand-curated inclusion criteria, standardization of units, and conversion of values from their continuous scale to a semi-quantitative set of “points” as is done in the APACHE scoring algorithms. Attempting to work with such standardized point values as inputs consistently resulted in markedly worse discrimination in random forest models and neural network models than using other “less clean” datasets (the difference between Dataset D and other datasets is significant with a p-value < 0.05).

### Variable Importance

The most important predictors of 30-day mortality were age and laboratory values. Age had the highest importance scores, regardless of which dataset was used, indicating that age is the most important variable when predicting 30-day mortality.

The 10 laboratory values also had high importance scores. For datasets A, B, and C, laboratory values fell in the top-13 most important variables, and there were at least 8 laboratory values in the top-10 most important variables. However, for dataset D, there were only 6 laboratory values in the top-10 most important variables, and the variable white blood cell score ranked 20<sup>th</sup>. This may indicate that transforming laboratory values to APACHE scores results in the loss of information contained in the original values and negatively influences the performance of the random forest model.

### Partial Dependence Plots

As it is hard to visualize the relationship between multiple predictors and the outcome, we created partial dependence plots to show the effect of predictors on the outcome[34]. The plots can also show whether the relationship between a specific predictor and the outcome is linear, quadratic, monotonic, or more complex. Further analysis can be done by combining the partial dependence plots and medical knowledge. **Figure 3** and **Figure 4** are the partial dependence plots for the pH score and the PaO<sub>2</sub> score. We will take these as examples to show how the value of predictors in different datasets affects 30-day mortality. The X-axis is the value of the predictor. For each value of the predictor, the Y-axis is the averaged model output for all observations with the corresponding value of the predictor. A higher partial dependence



1 value corresponds to a higher risk of mortality. As we know, the normal value of the pH score is 7.4, and both higher values  
2 and lower values are abnormal. Typically, abnormal values lead to a larger risk of death. Therefore, a U-shaped partial  
3 dependence plot is to be expected for datasets A, B, and C. However, only the plot for dataset C is U-shaped. This is  
4 because dataset C is "cleaner" than datasets A and B, and the models can learn the real effect of pH score on 30-day  
5 mortality. Datasets A and B are not as clean as dataset C, as some other variables are presented in these datasets as pH  
6 score. Thus, it is difficult for the models to utilize the pH score variable in datasets A and B. This result indicates that  
7 cleaner variables benefits the classification models. However, not all variables have this problem. For most other variables  
8 such as the PaO<sub>2</sub> score, the plots of datasets A, B, and C have similar trends.  
9  
10  
11  
12  
13  
14  
15  
16  
17  
18  
19

## 20 **DISCUSSION**

21 We used real data from a large nationwide health system to explore the interaction between missing data imputation  
22 techniques, data cleanliness, and classification methods for the common problem of predicting 30-day mortality in a hold-  
23 out testing dataset. In brief, we found that any of several imputation techniques other than case-wise deletion performed  
24 equivalently in terms of discrimination, regardless of data cleanliness or classification method used. We found that logistic  
25 regression showed worse discrimination with less carefully cleaned data than did random forest or neural networks.  
26  
27 Random forest models (and to a degree, neural networks) displayed diminished discrimination when given data that had  
28 been too highly cleaned and standardized prior to use.  
29  
30  
31  
32  
33  
34  
35  
36  
37  
38  
39  
40

### 41 **Relationship to Past Research**

42 Missing data are ubiquitous in large datasets. Even when missingness is completely at random, missing data lead to  
43 significant loss in statistical power and predictive ability[32]. We have previously found that the Random Forest method  
44 consistently produced the lowest imputation error compared to commonly used imputation methods[26]. Random Forest  
45 had the smallest prediction difference when 10-30% of the laboratory data was missing. Our present analysis of real data  
46 shows that as more specialized laboratory values are introduced into the prediction setting, much higher levels of  
47 missingness may be present. We thereby extend the previous finding that Random Forest continues to perform well for  
48  
49  
50  
51  
52  
53  
54  
55  
56  
57  
58  
59  
60

1 missing data. Our findings on the poor performance of case-wise deletion as an approach to handling missing data are in  
2 agreement with mainstream recommendations for more than two decades[32].  
3  
4  
5

6  
7 Our findings on missing data are of note because of the distinctive, yet real world, way in which missing data were  
8 generated. There were two missingness processes. First, clinicians in routine practice only sometimes order any given  
9 laboratory, and thus the presence or absence of an order may itself provide prognostic importance. [35] Second, a given  
10 effort to identify all of a given target laboratory values may or may not succeed. Even in a large system with a strong  
11 tradition of centralization, the extent to which laboratory ascension and labeling practices coincide with their aspiration  
12 varies over time, and often clinical insight is necessary to distinguish valid laboratory tests[36]. For any given data pull, it  
13 is not trivial to understand which missing values represent failure to find data that exist versus representing true  
14 missingness. Past work has rarely explicitly considered these distinct missingness-generating processes (in addition to true  
15 missingness at random) at their distinct implications.  
16  
17  
18  
19  
20  
21  
22  
23  
24  
25

26  
27  
28  
29  
30 The finding of poorer discrimination of Random Forest in models where the data were fully standardized and cleaned was  
31 not anticipated given past literature. The APACHE score was designed to simplify the lab results and to help doctors predict  
32 mortality [2]. Even in its more recent incarnations, APACHE transforms continuous lab results into discrete acute  
33 physiology scores[37]. Our data suggest that transforming lab results to APACHE scores is not necessary for Random Forest  
34 and may even lead to the loss of information[23]. Remarkably, even standardization to equivalent units across institutions  
35 may not be necessary—but at the same time, this means that sources of variance other than simply the laboratory value  
36 may also be subtly incorporated into risk-prediction with non-standardized ways. It is a case-specific decision as to  
37 whether incorporation of such variance is helpful for a given task or is a source of bias.  
38  
39  
40  
41  
42  
43  
44  
45  
46  
47  
48  
49

## 50 **Implications**

51  
52 Our findings have implications for both practitioners seeking to implement a given prediction rule and scientists interested  
53 in risk-prediction generally. For practitioners, no given method yields consistently superior results in terms of  
54 discrimination. Therefore, other performance considerations, whether psychometric or implementation ease, may play  
55  
56  
57  
58  
59

1 an important role. They also suggest that missing data imputation approaches other than case-wise deletion during  
2 development are mandatory.  
3  
4  
5  
6

7 Our results also note that Random Forests and neural networks were strikingly robust to even quite naively prepared data,  
8 in contrast to logistic regression. This suggests that the truth of the oft-quoted aphorisms about “garbage in, garbage out”  
9 may depend on the categorization model and missing data imputation method used. In situations where ascertainment  
10 and cleaning of data are more costly, random forests may offer pragmatic advantages if these findings are replicable.  
11  
12  
13  
14  
15

## 18 **Strengths and Limitations**

19  
20  
21 Strengths of our analysis include its use of real world data, with real world data generation and missingness-generation  
22 problems on an established problem encountered by medical researchers and clinicians. We also used multiple methods  
23 implemented in standardized ways. The approach we used for each implementation is available in an Appendix or via  
24 GitHub to allow transparency and reproducibility.  
25  
26  
27  
28  
29  
30

31  
32 Limitations of our analysis stem fundamentally from the nearly infinite combinations of analysis factors that might be  
33 varied, and our inability to explore such a high dimensional space. Thus we only considered one outcome and one  
34 standardization method, and decided upon an a priori approach for each combination of dataset, categorization model,  
35 and missingness imputation method used. Other outcomes and other possible data structures (such as using trends in  
36 data) may yield different answers. We focus on discrimination, as measured by AUC, but other measurement properties  
37 are assuredly also important. We also focused on individual-level prediction, as opposed to considering the impact on  
38 hospital-level quality assessment or other tasks for which these results may be used.  
39  
40  
41  
42  
43  
44  
45  
46  
47  
48  
49

## 50 **CONCLUSION**

51  
52  
53 In sum, our results suggest that there is little variation in discrimination among different statistical classification models  
54 in well-cleaned data using modern missing data imputation techniques. As such, the decision about which of the well-  
55  
56  
57  
58  
59  
60

1 performing imputation and adjustment methods to use can be made based on other factors relevant to the particular  
2 application—as long as the lower performing methods are avoided. If these findings are replicated in other data with other  
3 outcomes, they may help inform pragmatic model selection.  
4  
5  
6  
7  
8  
9  
10  
11  
12  
13  
14  
15  
16  
17  
18  
19  
20  
21  
22  
23  
24  
25  
26  
27  
28  
29  
30  
31  
32  
33  
34  
35  
36  
37  
38  
39  
40  
41  
42  
43  
44  
45  
46  
47  
48  
49  
50  
51  
52  
53  
54  
55  
56  
57  
58  
59  
60

For peer review only

**Figure Captions**

1  
2 Figure 1. AUC Scores, Full Model

3  
4 Figure 2. AUC Scores for lab-only predictors

5  
6 Figure 3. Partial Dependence Plots for pH

7  
8 Figure 4. Partial Dependence Plots for PaO<sub>2</sub>

9  
10  
11  
12  
13  
14  
15  
16  
17  
18  
19  
20  
21  
22  
23  
24  
25  
26  
27  
28  
29  
30  
31  
32  
33  
34  
35  
36  
37  
38  
39  
40  
41  
42  
43  
44  
45  
46  
47  
48  
49  
50  
51  
52  
53  
54  
55  
56  
57  
58  
59  
60

For peer review only

## ACKNOWLEDGEMENTS

### Author Contributions

**Theodore J. Iwashyna:** Conceptualization, Investigation, Methodology, Supervision, Writing – original draft, Writing – review & editing

**Cheng Ma:** Formal analysis, software, visualization, writing-original draft, and writing-review & editing

**Xiao Qing Wang:** Data curation; Writing – original draft; Writing – review & editing

**Sarah Seelye :** Writing – original draft; Writing – review & editing

**Ji Zhu :** Conceptualization, Methodology, Supervision, Writing – original draft, Writing – review & editing

**Akbar K. Waljee:** Conceptualization, Methodology, Supervision, Writing – original draft, Writing – review & editing

**Declarations of funding interests:** This work was supported by a career development grant award [CDA 11-217 to A.K.W] and a Merit Review Award Number [IIR 16-024 to A.K.W, 17-045 to T.J.I.] from the United States Department of Veterans Affairs Health Services Research. The content is solely the responsibility of the authors and does not necessarily represent the official views of the University of Michigan, the Veterans Affairs, the U.S. Government, or the National Institutes of Health.

**Disclosures:** The authors declare there are no conflicts to disclose

**Guarantor of the article:** Akbar K. Waljee the submission's guarantor, takes responsibility for the integrity of the work as a whole, from inception to published article.

### Licensing Statement:

I, Akbar Waljee, as the Submitting Author have the right to grant and does grant on behalf of all authors of the Work (as defined in the below author license), an exclusive license and/or a non-exclusive license for contributions from authors who are: i) UK Crown employees; ii) where BMJ has agreed a CC-BY license shall apply, and/or iii) in accordance with the terms applicable for US Federal Government officers or employees acting as part of their official duties; on a worldwide, perpetual, irrevocable, royalty-free basis to BMJ Publishing Group Ltd ("BMJ") its licensees and where the relevant Journal is co-owned by BMJ to the co-owners of the Journal, to publish the Work in BMJ Open and any other BMJ products and to exploit all rights, as set out in our [license](#).

The Submitting Author accepts and understands that any supply made under these terms is made by BMJ to the Submitting Author unless you are acting as an employee on behalf of your employer or a postgraduate student of an affiliated institution which is paying any applicable article publishing charge ("APC") for Open Access articles. Where the Submitting Author wishes to make the Work available on an Open Access basis (and intends to pay the relevant APC), the terms of reuse of such Open Access shall be governed by a Creative Commons license – details of these licenses and which [Creative Commons](#) license will apply to this Work are set out in our license referred to above.

### Data Sharing Statement:

Appendices and statistical code are available via Github at <https://github.com/CCMRcodes/GIVO> . The dataset cannot be disseminated due to inclusion of sensitive patient information under VA regulations.

1  
2  
3  
4  
5  
6  
7  
8  
9  
10  
11  
12  
13  
14  
15  
16  
17  
18  
19  
20  
21  
22  
23  
24  
25  
26  
27  
28  
29  
30  
31  
32  
33  
34  
35  
36  
37  
38  
39  
40  
41  
42  
43  
44  
45  
46  
47  
48  
49  
50  
51  
52  
53  
54  
55  
56  
57  
58  
59  
60

For peer review only

## REFERENCES

- 1 [1] Iezzoni LI. Risk adjustment for measuring health care outcomes. 4th ed. Chicago, Ill. Arlington, VA: Health  
2 Administration Press; AUPHA; 2013.
- 3 [2] Lane-Fall MB, Neuman MD. Outcomes measures and risk adjustment. *Int Anesthesiol Clin*. 2013;51:10-21.
- 4 [3] Quality AfHRa. Part II. Introduction to Measures of Quality (continued). Rockville, MD.
- 5 [4] Bernard GR, Vincent JL, Laterre PF, LaRosa SP, Dhainaut JF, Lopez-Rodriguez A, et al. Efficacy and safety of  
6 recombinant human activated protein C for severe sepsis. *N Engl J Med*. 2001;344:699-709.
- 7 [5] Harrell FE, Lee KL, Califf RM, Pryor DB, Rosati RA. Regression modelling strategies for improved prognostic prediction.  
8 *Stat Med*. 1984;3:143-52.
- 9 [6] Harrell FE, Lee KL, Mark DB. Multivariable prognostic models: issues in developing models, evaluating assumptions  
10 and adequacy, and measuring and reducing errors. *Stat Med*. 1996;15:361-87.
- 11 [7] van Smeden M, de Groot JA, Moons KG, Collins GS, Altman DG, Eijkemans MJ, et al. No rationale for 1 variable per 10  
12 events criterion for binary logistic regression analysis. *BMC Med Res Methodol*. 2016;16:163.
- 13 [8] Riley RD, Snell KI, Ensor J, Burke DL, Harrell FE, Jr., Moons KG, et al. Minimum sample size for developing a  
14 multivariable prediction model: PART II - binary and time-to-event outcomes. *Stat Med*. 2019;38:1276-96.
- 15 [9] van Smeden M, Moons KG, de Groot JA, Collins GS, Altman DG, Eijkemans MJ, et al. Sample size for binary logistic  
16 prediction models: Beyond events per variable criteria. *Stat Methods Med Res*. 2019;28:2455-74.
- 17 [10] Moons KG, Altman DG, Reitsma JB, Ioannidis JP, Macaskill P, Steyerberg EW, et al. Transparent Reporting of a  
18 multivariable prediction model for Individual Prognosis or Diagnosis (TRIPOD): explanation and elaboration. *Ann Intern  
19 Med*. 2015;162:W1-73.
- 20 [11] Steyerberg EW, ProQuest (Firm). Clinical prediction models a practical approach to development, validation, and  
21 updating. New York: Springer; 2009. p. xxviii, 497 p.
- 22 [12] Render ML, Kim HM, Welsh DE, Timmons S, Johnston J, Hui S, et al. Automated intensive care unit risk adjustment:  
23 results from a National Veterans Affairs study. *Crit Care Med*. 2003;31:1638-46.
- 24 [13] Render ML, Deddens J, Freyberg R, Almenoff P, Connors AF, Wagner D, et al. Veterans Affairs intensive care unit risk  
25 adjustment model: validation, updating, recalibration. *Crit Care Med*. 2008;36:1031-42.
- 26 [14] Render ML, Freyberg RW, Hasselbeck R, Hofer TP, Sales AE, Deddens J, et al. Infrastructure for quality  
27 transformation: measurement and reporting in veterans administration intensive care units. *BMJ Qual Saf*. 2011;20:498-  
28 507.
- 29 [15] Wang XQ, Vincent BM, Wiitala WL, Luginbill KA, Viglianti EM, Prescott HC, et al. Veterans Affairs patient database  
30 (VAPD 2014-2017): building nationwide granular data for clinical discovery. *BMC Med Res Methodol*. 2019;19:94.
- 31 [16] McDonald CJ, Huff SM, Suico JG, Hill G, Leavelle D, Aller R, et al. LOINC, a universal standard for identifying  
32 laboratory observations: a 5-year update. *Clin Chem*. 2003;49:624-33.
- 33 [17] Forrey AW, McDonald CJ, DeMoor G, Huff SM, Leavelle D, Leland D, et al. Logical observation identifier names and  
34 codes (LOINC) database: a public use set of codes and names for electronic reporting of clinical laboratory test results.  
35 *Clin Chem*. 1996;42:81-90.
- 36 [18] van Walraven C, Austin PC, Jennings A, Quan H, Forster AJ. A modification of the Elixhauser comorbidity measures  
37 into a point system for hospital death using administrative data. *Med Care*. 2009;47:626-33.
- 38 [19] HCUP-US Tools & Software Page. 2019.
- 39 [20] Hooper TI, Gackstetter GD, Leardmann CA, Boyko EJ, Pearse LA, Smith B, et al. Early mortality experience in a large  
40 military cohort and a comparison of mortality data sources. *Popul Health Metr*. 2010;8:15.
- 41 [21] Prescott HC, Kepreos KM, Wiitala WL, Iwashyna TJ. Temporal Changes in the Influence of Hospitals and Regional  
42 Healthcare Networks on Severe Sepsis Mortality. *Crit Care Med*. 2015;43:1368-74.
- 43 [22] Breiman L. Classification and regression trees. New York, NY: Chapman & Hall; 1993.
- 44 [23] Breiman L. Random Forests. *Machine Learning*. 2001;45:5-32.
- 45 [24] Omidvar O, Dayhoff JE, ScienceDirect (Online service). Neural networks and pattern recognition. San Diego, Calif.:  
46 Academic Press; 1998.
- 47 [25] Pedregosa F, Varoquaux G, Gramfort A, Michel V, Thirion B, Grisel O, et al. Scikit-learn: Machine learning in Python.  
48 *Journal of machine learning research*. 2011;12:2825-30.



- 1 [26] Waljee AK, Mukherjee A, Singal AG, Zhang Y, Warren J, Balis U, et al. Comparison of imputation methods for missing  
2 laboratory data in medicine. *BMJ Open*. 2013;3.
- 3 [27] Stekhoven DJ, Buhlmann P. MissForest--non-parametric missing value imputation for mixed-type data.  
4 *Bioinformatics*. 2012;28:112-8.
- 5 [28] Geurts P, Ernst D, Wehenkel L. Extremely randomized trees. *Machine Learning*. 2006;63:3-42.
- 6 [29] Maree R, Geurts P, Wehenkel L. Random subwindows and extremely randomized trees for image classification in  
7 cell biology. *BMC Cell Biol*. 2007;8 Suppl 1:S2.
- 8 [30] Hastie T, Friedman J, Tibshirani R, SpringerLink (Online service). *The Elements of Statistical Learning Data Mining,*  
9 *Inference, and Prediction*. New York, NY: Springer New York : Imprint: Springer; 2001.
- 10 [31] Knaus WA, Zimmerman JE, Wagner DP, Draper EA, Lawrence DE. APACHE-acute physiology and chronic health  
11 evaluation: a physiologically based classification system. *Crit Care Med*. 1981;9:591-7.
- 12 [32] Allison PD, Sage Publications. *Missing data*. Thousand Oaks, [Calif.] ; London: SAGE; 2002. p. 1 online resource (vi, 91  
13 p.).
- 14 [33] Louppe G, Wehenkel L, Suter A, Geurts P. Understanding variable importances in forests of randomized trees.  
15 *Proceedings of the 26th International Conference on Neural Information Processing Systems - Volume 1*. Lake Tahoe,  
16 Nevada: Curran Associates Inc.; 2013. p. 431-9.
- 17 [34] Friedman JH. Greedy Function Approximation: A Gradient Boosting Machine. *The Annals of Statistics*. 2001;29:1189-  
18 232.
- 19 [35] Agniel D, Kohane IS, Weber GM. Biases in electronic health record data due to processes within the healthcare  
20 system: retrospective observational study. *BMJ*. 2018;361:k1479.
- 21 [36] Wiitala WL, Vincent BM, Burns JA, Prescott HC, Waljee AK, Cohen GR, et al. Variation in Laboratory Test Naming  
22 Conventions in EHRs Within and Between Hospitals: A Nationwide Longitudinal Study. *Med Care*. 2019;57:e22-e7.
- 23 [37] Zimmerman JE, Kramer AA, McNair DS, Malila FM. Acute Physiology and Chronic Health Evaluation (APACHE) IV:  
24 hospital mortality assessment for today's critically ill patients. *Crit Care Med*. 2006;34:1297-310.
- 25  
26  
27  
28  
29  
30  
31  
32  
33  
34  
35  
36  
37  
38  
39  
40  
41  
42  
43  
44  
45  
46  
47  
48  
49  
50  
51  
52  
53  
54  
55  
56  
57  
58  
59  
60

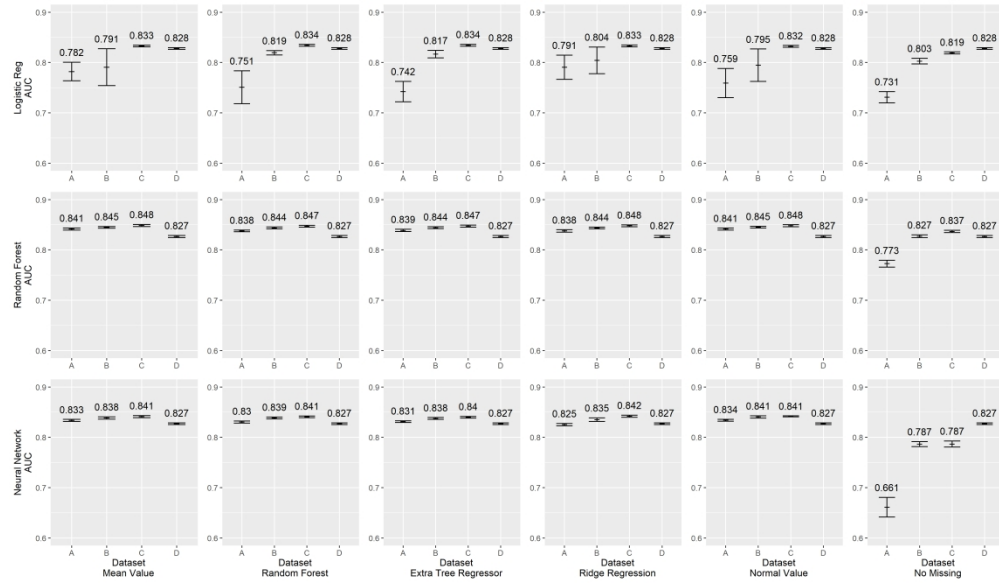

Figure 1: AUC Scores, Full Model

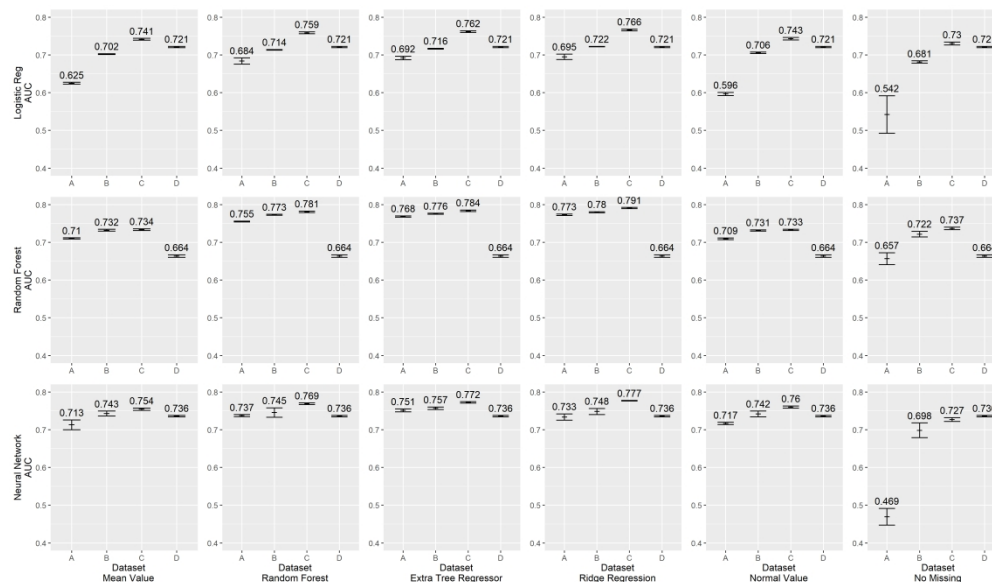

Figure 2. AUC Scores for lab-only predictors

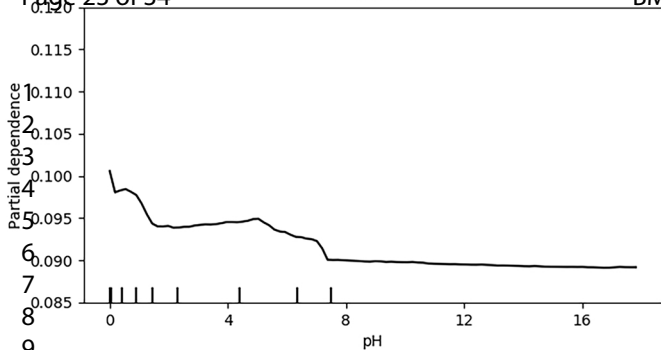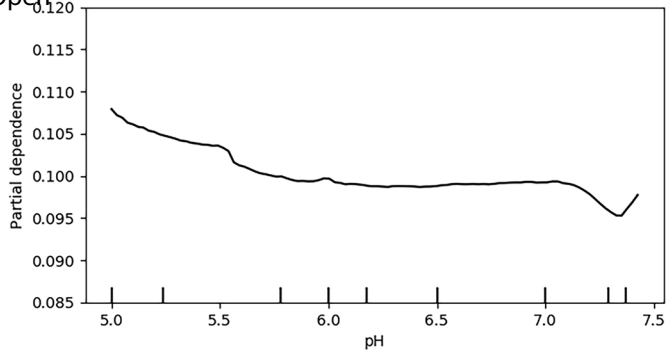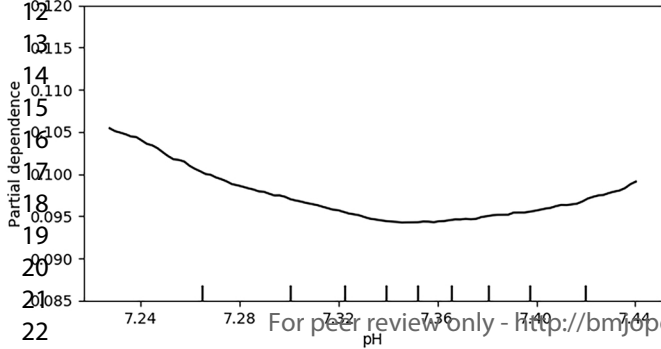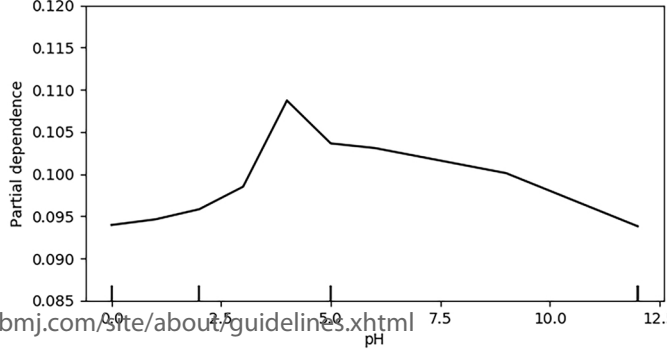

For peer review only - <http://bmjopen.bmj.com/site/about/guidelines.xhtml>

Figure 3: Partial Dependence Plots for pH

Dataset A

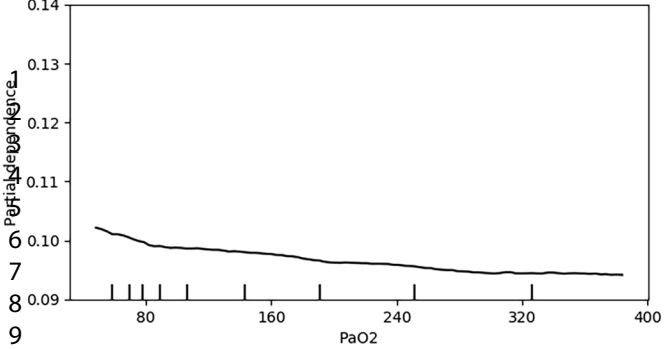

Dataset B

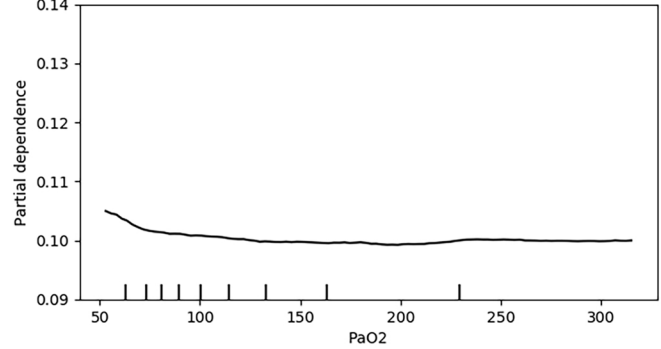

Dataset C

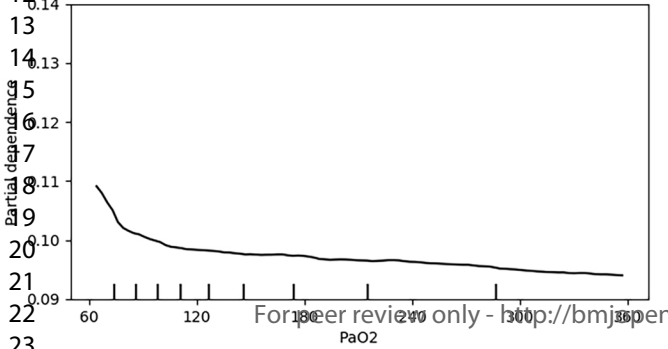

Dataset D

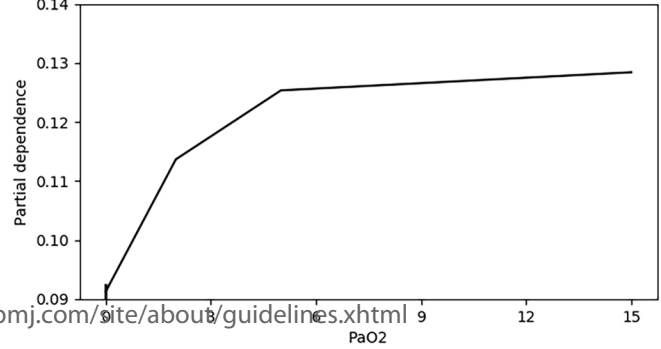

For peer review only - <http://bmjopen.bmj.com/site/about/guidelines.xhtml>

Figure 4: Partial Dependence Plots PaO2

1  
2  
3 **Appendix A.** Patient-level variables included in models  
4  
5  
6

7  
8  
9  
10  
11  
12  
13  
14  
15  
16  
17  
18  
19  
20  
21  
22  
23  
24  
25  
26  
27  
28  
29  
30  
31  
32  
33  
34  
35  
36  
37  
38  
39  
40  
41  
42  
43  
44  
45  
46  
47  
48  
49  
50  
51  
52  
53  
54  
55  
56  
57  
58  
59  
60

|                                                  |                                                                                                                                                                                                                                                                                                                                                                                                                                                                                                                                                                                                                                                                                                                                                                                                                                                                                                                                                                                                                                                                                                                                                                                                                                                                  |
|--------------------------------------------------|------------------------------------------------------------------------------------------------------------------------------------------------------------------------------------------------------------------------------------------------------------------------------------------------------------------------------------------------------------------------------------------------------------------------------------------------------------------------------------------------------------------------------------------------------------------------------------------------------------------------------------------------------------------------------------------------------------------------------------------------------------------------------------------------------------------------------------------------------------------------------------------------------------------------------------------------------------------------------------------------------------------------------------------------------------------------------------------------------------------------------------------------------------------------------------------------------------------------------------------------------------------|
| Demographics                                     | Gender, Age, Race (White, Black or African American, Asian, Native Hawaiian or other Pacific Islander, Unknown), Hispanic ethnicity                                                                                                                                                                                                                                                                                                                                                                                                                                                                                                                                                                                                                                                                                                                                                                                                                                                                                                                                                                                                                                                                                                                              |
| Comorbidities, included in Elixhauser            | Hypertension, Congestive Heart Failure, Cardiac Arrhythmia, Valvular Disease, Pulmonary Circulation Disorders, Peripheral Vascular Disorders, Paralysis, Other Neurological Disorders, Chronic Pulmonary Disease, Diabetes Uncomplicated, Diabetes Complicated, Hypothyroidism, Renal Failure, Liver Disease, Peptic Ulcer Disease excluding bleeding, AIDS/HIV, Lymphoma, Metastatic Cancer, Solid Tumor without Metastasis, Rheumatoid Arthritis/Collagen, Coagulopathy, Obesity, Weight Loss, Fluid and Electrolyte Disorders, Blood Loss Anemia, Deficiency Anemia, Alcohol Abuse, Drug Abuse, Psychoses, Depression                                                                                                                                                                                                                                                                                                                                                                                                                                                                                                                                                                                                                                         |
| Diagnoses, HCUP CCS single-level and multi-level | <p>Top 20 most frequent single-level CCS diagnoses:<br/>Congestive Heart Failure (non-hypertensive), Non-specific Chest Pain, Coronary Atherosclerosis and Other Heart Disease, Cardiac Dysrhythmias, Alcohol-related Disorders, Septicemia (except in labor), Chronic Obstructive Pulmonary Disease and Bronchiectasis, Pneumonia, Skin and Subcutaneous Tissue Infections, Osteoarthritis, Complication of Device (implant or graft), Complications of Surgical Procedures or Medical Care, Diabetes Mellitus with Complications, Respiratory Failure, Urinary Tract Infections, Renal Failure, Spondylosis, Acute Myocardial Infarction, Fluid and Electrolyte Disorders, Gastrointestinal Hemorrhage</p> <p>18 level 1 multi-level CCS categories:<br/>Infectious and Parasitic Diseases, Neoplasms, Endocrine Disorders, Anemia, Mental Illness, Diseases of the Nervous System, Diseases of the Circulatory System, Diseases of the Respiratory System, Diseases of the Digestive System, Diseases of the Genitourinary System, Complications of Pregnancy or Childbirth, Skin Disease, Diseases of the Musculoskeletal System, Congenital Anomalies, Perinatal Conditions, Injury and Poisoning, Other Health Status Conditions, Other Residual Codes</p> |
| Laboratory values                                | Albumin, Bilirubin, Blood Urea Nitrogen, Creatinine, Glucose, Hematocrit, Partial pressure of oxygen score, pH score, Sodium, White Blood Cell                                                                                                                                                                                                                                                                                                                                                                                                                                                                                                                                                                                                                                                                                                                                                                                                                                                                                                                                                                                                                                                                                                                   |

## Appendix B

Table B.1: Model Performances (Full Model)

| Classification Method | Dataset | Imputation Method      | AUROC (95%CI)   | Optimal Cutoff | Predicted Cases |          | Accurate Rate |          | Sensitivity | Specificity | Brier Score |
|-----------------------|---------|------------------------|-----------------|----------------|-----------------|----------|---------------|----------|-------------|-------------|-------------|
|                       |         |                        |                 |                | Death           | Survival | Death         | Survival |             |             |             |
| Logistic Regression   | A       | Mean Value             | 0.78(0.76-0.80) | 0.48           | 37199           | 69549    | 0.21          | 0.96     | 0.74        | 0.69        | 0.19        |
| Logistic Regression   | B       | Mean Value             | 0.79(0.75-0.83) | 0.46           | 34915           | 71833    | 0.24          | 0.97     | 0.80        | 0.72        | 0.17        |
| Logistic Regression   | C       | Mean Value             | 0.83(0.83-0.83) | 0.46           | 35970           | 70778    | 0.23          | 0.97     | 0.79        | 0.71        | 0.17        |
| Logistic Regression   | A       | Random Forest          | 0.75(0.72-0.78) | 0.49           | 39528           | 67220    | 0.18          | 0.95     | 0.69        | 0.66        | 0.21        |
| Logistic Regression   | B       | Random Forest          | 0.82(0.82-0.82) | 0.49           | 31996           | 74752    | 0.25          | 0.97     | 0.77        | 0.75        | 0.17        |
| Logistic Regression   | C       | Random Forest          | 0.83(0.83-0.84) | 0.46           | 36017           | 70731    | 0.23          | 0.97     | 0.79        | 0.71        | 0.17        |
| Logistic Regression   | A       | Extra Trees Regression | 0.74(0.72-0.76) | 0.46           | 45762           | 60986    | 0.17          | 0.96     | 0.74        | 0.61        | 0.21        |
| Logistic Regression   | B       | Extra Trees Regression | 0.82(0.81-0.82) | 0.47           | 33642           | 73106    | 0.25          | 0.97     | 0.79        | 0.74        | 0.17        |
| Logistic Regression   | C       | Extra Trees Regression | 0.83(0.83-0.84) | 0.47           | 34579           | 72169    | 0.24          | 0.97     | 0.78        | 0.73        | 0.17        |
| Logistic Regression   | A       | Ridge Regression       | 0.79(0.77-0.82) | 0.46           | 38579           | 68169    | 0.21          | 0.97     | 0.78        | 0.68        | 0.18        |
| Logistic Regression   | B       | Ridge Regression       | 0.80(0.78-0.83) | 0.46           | 35034           | 71714    | 0.24          | 0.97     | 0.80        | 0.72        | 0.17        |

1  
2  
3  
4  
5  
6  
7  
8  
9  
10  
11  
12  
13  
14  
15  
16  
17  
18  
19  
20  
21  
22  
23  
24  
25  
26  
27  
28  
29  
30  
31  
32  
33  
34  
35  
36  
37  
38  
39  
40  
41  
42  
43  
44  
45  
46  
47

|                     |   |                  |                 |      |       |       |      |      |      |      |      |
|---------------------|---|------------------|-----------------|------|-------|-------|------|------|------|------|------|
| Logistic Regression | C | Ridge Regression | 0.83(0.83-0.84) | 0.47 | 35220 | 71528 | 0.23 | 0.97 | 0.78 | 0.72 | 0.17 |
| Logistic Regression | A | Normal Value     | 0.76(0.73-0.79) | 0.50 | 37392 | 69356 | 0.18 | 0.95 | 0.63 | 0.68 | 0.22 |
| Logistic Regression | B | Normal Value     | 0.80(0.76-0.83) | 0.50 | 30977 | 75771 | 0.26 | 0.97 | 0.76 | 0.76 | 0.17 |
| Logistic Regression | C | Normal Value     | 0.83(0.83-0.83) | 0.46 | 35676 | 71072 | 0.23 | 0.97 | 0.78 | 0.72 | 0.17 |
| Logistic Regression | A | No Missing       | 0.73(0.72-0.74) | 0.43 | 37658 | 69090 | 0.18 | 0.95 | 0.66 | 0.68 | 0.18 |
| Logistic Regression | B | No Missing       | 0.8(0.80-0.81)  | 0.42 | 33153 | 73595 | 0.24 | 0.97 | 0.76 | 0.74 | 0.14 |
| Logistic Regression | C | No Missing       | 0.82(0.82-0.82) | 0.44 | 35333 | 71415 | 0.22 | 0.96 | 0.76 | 0.72 | 0.16 |
| Logistic Regression | D | None             | 0.83(0.83-0.83) | 0.47 | 34184 | 72564 | 0.24 | 0.97 | 0.78 | 0.73 | 0.17 |
| Random Forest       | A | Mean Value       | 0.84(0.84-0.84) | 0.12 | 32330 | 74418 | 0.26 | 0.97 | 0.79 | 0.75 | 0.07 |
| Random Forest       | B | Mean Value       | 0.85(0.84-0.85) | 0.11 | 32642 | 74106 | 0.26 | 0.97 | 0.80 | 0.75 | 0.07 |
| Random Forest       | C | Mean Value       | 0.85(0.85-0.85) | 0.11 | 33548 | 73200 | 0.25 | 0.97 | 0.81 | 0.74 | 0.07 |
| Random Forest       | A | Random Forest    | 0.84(0.84-0.84) | 0.12 | 32659 | 74089 | 0.25 | 0.97 | 0.78 | 0.75 | 0.07 |
| Random Forest       | B | Random Forest    | 0.84(0.84-0.85) | 0.11 | 34093 | 72655 | 0.25 | 0.97 | 0.81 | 0.73 | 0.07 |



|               |   |                        |                 |      |       |       |      |      |      |      |      |
|---------------|---|------------------------|-----------------|------|-------|-------|------|------|------|------|------|
| Random Forest | C | Random Forest          | 0.85(0.85-0.85) | 0.11 | 33029 | 73719 | 0.25 | 0.97 | 0.80 | 0.74 | 0.07 |
| Random Forest | A | Extra Trees Regression | 0.84(0.84-0.84) | 0.11 | 32938 | 73810 | 0.25 | 0.97 | 0.79 | 0.74 | 0.07 |
| Random Forest | B | Extra Trees Regression | 0.84(0.84-0.85) | 0.12 | 32411 | 74337 | 0.26 | 0.97 | 0.80 | 0.75 | 0.07 |
| Random Forest | C | Extra Trees Regression | 0.85(0.85-0.85) | 0.11 | 33567 | 73181 | 0.25 | 0.97 | 0.80 | 0.74 | 0.07 |
| Random Forest | A | Ridge Regression       | 0.84(0.45-0.84) | 0.11 | 34587 | 72161 | 0.24 | 0.97 | 0.80 | 0.73 | 0.07 |
| Random Forest | B | Ridge Regression       | 0.84(0.84-0.85) | 0.12 | 31643 | 75105 | 0.26 | 0.97 | 0.79 | 0.76 | 0.07 |
| Random Forest | C | Ridge Regression       | 0.85(0.85-0.85) | 0.12 | 32531 | 74217 | 0.25 | 0.97 | 0.79 | 0.75 | 0.07 |
| Random Forest | A | Normal Value           | 0.84(0.84-0.84) | 0.12 | 31234 | 75514 | 0.26 | 0.97 | 0.78 | 0.76 | 0.07 |
| Random Forest | B | Normal Value           | 0.85(0.84-0.85) | 0.11 | 32711 | 74037 | 0.26 | 0.97 | 0.80 | 0.75 | 0.07 |
| Random Forest | C | Normal Value           | 0.85(0.85-0.85) | 0.12 | 31159 | 75589 | 0.26 | 0.97 | 0.78 | 0.76 | 0.07 |
| Random Forest | A | No Missing             | 0.77(0.77-0.78) | 0.18 | 36332 | 70416 | 0.20 | 0.96 | 0.71 | 0.70 | 0.08 |
| Random Forest | B | No Missing             | 0.83(0.82-0.83) | 0.16 | 31836 | 74912 | 0.25 | 0.97 | 0.77 | 0.75 | 0.07 |
| Random Forest | C | No Missing             | 0.84(0.83-0.84) | 0.16 | 34517 | 72231 | 0.24 | 0.97 | 0.78 | 0.73 | 0.08 |

1  
2  
3  
4  
5  
6  
7  
8  
9  
10  
11  
12  
13  
14  
15  
16  
17  
18  
19  
20  
21  
22  
23  
24  
25  
26  
27  
28  
29  
30  
31  
32  
33  
34  
35  
36  
37  
38  
39  
40  
41  
42  
43  
44  
45  
46  
47

|                |   |                        |                 |      |       |       |      |      |      |      |      |
|----------------|---|------------------------|-----------------|------|-------|-------|------|------|------|------|------|
| Random Forest  | D | None                   | 0.83(0.83-0.83) | 0.11 | 33407 | 73341 | 0.24 | 0.97 | 0.77 | 0.74 | 0.07 |
| Neural Network | A | Mean Value             | 0.83(0.83-0.84) | 0.53 | 35031 | 71717 | 0.24 | 0.97 | 0.80 | 0.72 | 0.19 |
| Neural Network | B | Mean Value             | 0.84(0.84-0.84) | 0.52 | 32716 | 74032 | 0.25 | 0.97 | 0.79 | 0.75 | 0.17 |
| Neural Network | C | Mean Value             | 0.84(0.84-0.84) | 0.53 | 32549 | 74199 | 0.25 | 0.97 | 0.79 | 0.75 | 0.17 |
| Neural Network | A | Random Forest          | 0.83(0.83-0.83) | 0.55 | 32515 | 74233 | 0.25 | 0.97 | 0.77 | 0.75 | 0.19 |
| Neural Network | B | Random Forest          | 0.84(0.84-0.84) | 0.57 | 30842 | 75906 | 0.26 | 0.97 | 0.77 | 0.76 | 0.18 |
| Neural Network | C | Random Forest          | 0.84(0.84-0.84) | 0.55 | 34144 | 72604 | 0.24 | 0.97 | 0.79 | 0.73 | 0.18 |
| Neural Network | A | Extra Trees Regression | 0.83(0.83-0.83) | 0.50 | 37351 | 69397 | 0.23 | 0.97 | 0.82 | 0.70 | 0.19 |
| Neural Network | B | Extra Trees Regression | 0.84(0.84-0.84) | 0.54 | 33529 | 73219 | 0.25 | 0.97 | 0.80 | 0.74 | 0.18 |
| Neural Network | C | Extra Trees Regression | 0.84(0.84-0.84) | 0.49 | 33324 | 73424 | 0.25 | 0.97 | 0.79 | 0.74 | 0.16 |
| Neural Network | A | Ridge Regression       | 0.83(0.82-0.83) | 0.51 | 33864 | 72884 | 0.24 | 0.97 | 0.78 | 0.73 | 0.17 |
| Neural Network | B | Ridge Regression       | 0.84(0.83-0.84) | 0.52 | 31186 | 75562 | 0.26 | 0.97 | 0.78 | 0.76 | 0.17 |
| Neural Network | C | Ridge Regression       | 0.84(0.84-0.84) | 0.55 | 32145 | 74603 | 0.25 | 0.97 | 0.78 | 0.75 | 0.18 |

|                |   |              |                 |      |       |       |      |      |      |      |      |
|----------------|---|--------------|-----------------|------|-------|-------|------|------|------|------|------|
| Neural Network | A | Normal Value | 0.83(0.83-0.84) | 0.58 | 31675 | 75073 | 0.25 | 0.97 | 0.77 | 0.76 | 0.19 |
| Neural Network | B | Normal Value | 0.84(0.84-0.84) | 0.45 | 35026 | 71722 | 0.24 | 0.97 | 0.81 | 0.72 | 0.16 |
| Neural Network | C | Normal Value | 0.84(0.84-0.84) | 0.55 | 32864 | 73884 | 0.25 | 0.97 | 0.79 | 0.75 | 0.18 |
| Neural Network | A | No Missing   | 0.66(0.64-0.68) | 0.76 | 49011 | 57737 | 0.14 | 0.94 | 0.65 | 0.56 | 0.50 |
| Neural Network | B | No Missing   | 0.79(0.78-0.79) | 0.59 | 32676 | 74072 | 0.23 | 0.96 | 0.71 | 0.74 | 0.21 |
| Neural Network | C | No Missing   | 0.79(0.78-0.79) | 0.59 | 38619 | 68129 | 0.20 | 0.96 | 0.75 | 0.68 | 0.24 |
| Neural Network | D | None         | 0.83(0.83-0.83) | 0.52 | 33760 | 72988 | 0.24 | 0.97 | 0.78 | 0.73 | 0.18 |

Table B.2: Model Performance (Using only lab variables)

| Classification Method | Dataset | Imputation Method      | AUROC (95%CI)   | Optimal Cutoff | Predicted Cases |          | Accurate Rate |          | Sensitivity | Specificity | Brier Score |
|-----------------------|---------|------------------------|-----------------|----------------|-----------------|----------|---------------|----------|-------------|-------------|-------------|
|                       |         |                        |                 |                | Death           | Survival | Death         | Survival |             |             |             |
| Logistic Regression   | A       | Mean Value             | 0.63(0.62-0.63) | 0.50           | 32327           | 74421    | 0.16          | 0.93     | 0.50        | 0.72        | 0.24        |
| Logistic Regression   | B       | Mean Value             | 0.70(0.70-0.70) | 0.47           | 33350           | 73398    | 0.21          | 0.95     | 0.66        | 0.73        | 0.20        |
| Logistic Regression   | C       | Mean Value             | 0.74(0.74-0.74) | 0.47           | 35248           | 71500    | 0.19          | 0.95     | 0.62        | 0.70        | 0.22        |
| Logistic Regression   | A       | Random Forest          | 0.68(0.68-0.69) | 0.48           | 39566           | 67182    | 0.17          | 0.94     | 0.63        | 0.66        | 0.23        |
| Logistic Regression   | B       | Random Forest          | 0.71(0.71-0.71) | 0.45           | 37758           | 68990    | 0.20          | 0.96     | 0.71        | 0.69        | 0.20        |
| Logistic Regression   | C       | Random Forest          | 0.76(0.76-0.76) | 0.47           | 38421           | 68327    | 0.18          | 0.95     | 0.66        | 0.67        | 0.21        |
| Logistic Regression   | A       | Extra Trees Regression | 0.69(0.69-0.70) | 0.46           | 43607           | 63141    | 0.17          | 0.95     | 0.69        | 0.62        | 0.22        |
| Logistic Regression   | B       | Extra Trees Regression | 0.72(0.72-0.72) | 0.44           | 39295           | 67453    | 0.20          | 0.96     | 0.73        | 0.67        | 0.19        |
| Logistic Regression   | C       | Extra Trees Regression | 0.76(0.76-0.76) | 0.45           | 42675           | 64073    | 0.17          | 0.95     | 0.71        | 0.63        | 0.21        |
| Logistic Regression   | A       | Ridge Regression       | 0.70(0.69-0.70) | 0.47           | 42514           | 64234    | 0.17          | 0.95     | 0.69        | 0.63        | 0.22        |
| Logistic Regression   | B       | Ridge Regression       | 0.72(0.72-0.72) | 0.44           | 39856           | 66892    | 0.20          | 0.96     | 0.75        | 0.67        | 0.19        |

|                     |   |                  |                   |      |       |       |      |      |      |      |      |
|---------------------|---|------------------|-------------------|------|-------|-------|------|------|------|------|------|
| Logistic Regression | C | Ridge Regression | 0.77(0.76-0.77)   | 0.45 | 42737 | 64011 | 0.17 | 0.95 | 0.71 | 0.63 | 0.21 |
| Logistic Regression | A | Normal Value     | 0.60(0.59-0.60)   | 0.49 | 31990 | 74758 | 0.15 | 0.92 | 0.46 | 0.72 | 0.24 |
| Logistic Regression | B | Normal Value     | 0.71(0.70-0.71)   | 0.45 | 38325 | 68423 | 0.19 | 0.95 | 0.70 | 0.68 | 0.20 |
| Logistic Regression | C | Normal Value     | 0.74 (0.74-0.75)  | 0.46 | 41447 | 65301 | 0.17 | 0.95 | 0.68 | 0.64 | 0.22 |
| Logistic Regression | A | No Missing       | 0.54 (0.49-0.59)  | 0.57 | 17678 | 89070 | 0.15 | 0.91 | 0.25 | 0.84 | 0.27 |
| Logistic Regression | B | No Missing       | 0.68 n(0.68-0.68) | 0.45 | 32766 | 73982 | 0.20 | 0.95 | 0.64 | 0.73 | 0.19 |
| Logistic Regression | C | No Missing       | 0.73(0.73-0.73)   | 0.50 | 30965 | 75783 | 0.19 | 0.94 | 0.55 | 0.74 | 0.23 |
| Logistic Regression | D | None             | 0.72(0.72-0.72)   | 0.49 | 35766 | 70982 | 0.19 | 0.95 | 0.64 | 0.70 | 0.21 |
| Random Forest       | A | Mean Value       | 0.71(0.71-0.71)   | 0.09 | 46226 | 60522 | 0.17 | 0.95 | 0.73 | 0.60 | 0.09 |
| Random Forest       | B | Mean Value       | 0.73(0.73-0.73)   | 0.10 | 44628 | 62120 | 0.18 | 0.96 | 0.75 | 0.62 | 0.09 |
| Random Forest       | C | Mean Value       | 0.73(0.73-0.74)   | 0.10 | 44525 | 62223 | 0.18 | 0.96 | 0.75 | 0.62 | 0.09 |
| Random Forest       | A | Random Forest    | 0.76(0.75-0.76)   | 0.09 | 41715 | 65033 | 0.18 | 0.96 | 0.74 | 0.65 | 0.08 |
| Random Forest       | B | Random Forest    | 0.77(0.77-0.77)   | 0.10 | 38154 | 68594 | 0.20 | 0.96 | 0.75 | 0.69 | 0.08 |

1  
2  
3  
4  
5  
6  
7  
8  
9  
10  
11  
12  
13  
14  
15  
16  
17  
18  
19  
20  
21  
22  
23  
24  
25  
26  
27  
28  
29  
30  
31  
32  
33  
34  
35  
36  
37  
38  
39  
40  
41  
42  
43  
44  
45  
46  
47

|               |   |                        |                 |      |       |       |      |      |      |      |      |
|---------------|---|------------------------|-----------------|------|-------|-------|------|------|------|------|------|
| Random Forest | C | Random Forest          | 0.78(0.78-0.78) | 0.09 | 40709 | 66039 | 0.19 | 0.96 | 0.75 | 0.66 | 0.08 |
| Random Forest | A | Extra Trees Regression | 0.77(0.77-0.77) | 0.09 | 43230 | 63518 | 0.19 | 0.96 | 0.77 | 0.64 | 0.08 |
| Random Forest | B | Extra Trees Regression | 0.78(0.77-0.78) | 0.10 | 38734 | 68014 | 0.20 | 0.96 | 0.76 | 0.68 | 0.08 |
| Random Forest | C | Extra Trees Regression | 0.78(0.78-0.79) | 0.10 | 38810 | 67938 | 0.20 | 0.96 | 0.74 | 0.68 | 0.08 |
| Random Forest | A | Ridge Regression       | 0.77(0.77-0.78) | 0.10 | 39913 | 66835 | 0.20 | 0.96 | 0.75 | 0.67 | 0.08 |
| Random Forest | B | Ridge Regression       | 0.78(0.78-0.78) | 0.09 | 39663 | 67085 | 0.20 | 0.97 | 0.77 | 0.67 | 0.08 |
| Random Forest | C | Ridge Regression       | 0.79(0.79-0.79) | 0.09 | 40249 | 66499 | 0.20 | 0.96 | 0.76 | 0.66 | 0.08 |
| Random Forest | A | Normal Value           | 0.71(0.71-0.71) | 0.10 | 46047 | 60701 | 0.17 | 0.95 | 0.73 | 0.60 | 0.09 |
| Random Forest | B | Normal Value           | 0.73(0.73-0.73) | 0.10 | 44400 | 62348 | 0.18 | 0.96 | 0.75 | 0.62 | 0.09 |
| Random Forest | C | Normal Value           | 0.73(0.73-0.74) | 0.09 | 46774 | 59974 | 0.17 | 0.96 | 0.77 | 0.60 | 0.09 |
| Random Forest | A | No Missing             | 0.66(0.64-0.67) | 0.26 | 20159 | 86589 | 0.21 | 0.93 | 0.40 | 0.83 | 0.10 |
| Random Forest | B | No Missing             | 0.72(0.71-0.73) | 0.14 | 52201 | 54547 | 0.16 | 0.96 | 0.78 | 0.54 | 0.08 |
| Random Forest | C | No Missing             | 0.74(0.73-0.74) | 0.21 | 26193 | 80555 | 0.22 | 0.94 | 0.55 | 0.79 | 0.09 |

|                |   |                        |                 |      |       |       |      |      |      |      |      |
|----------------|---|------------------------|-----------------|------|-------|-------|------|------|------|------|------|
| Random Forest  | D | None                   | 0.66(0.66-0.67) | 0.45 | 33868 | 72880 | 0.18 | 0.94 | 0.57 | 0.71 | 0.18 |
| Neural Network | A | Mean Value             | 0.71(0.70-0.73) | 0.47 | 33169 | 73579 | 0.19 | 0.94 | 0.60 | 0.72 | 0.19 |
| Neural Network | B | Mean Value             | 0.74(0.74-0.75) | 0.49 | 31171 | 75577 | 0.21 | 0.95 | 0.63 | 0.75 | 0.19 |
| Neural Network | C | Mean Value             | 0.75(0.75-0.76) | 0.40 | 42096 | 64652 | 0.18 | 0.96 | 0.74 | 0.64 | 0.18 |
| Neural Network | A | Random Forest          | 0.74(0.74-0.74) | 0.50 | 37930 | 68818 | 0.19 | 0.95 | 0.68 | 0.68 | 0.19 |
| Neural Network | B | Random Forest          | 0.75(0.73-0.76) | 0.54 | 36554 | 70194 | 0.20 | 0.96 | 0.71 | 0.70 | 0.22 |
| Neural Network | C | Random Forest          | 0.77(0.77-0.77) | 0.42 | 42444 | 64304 | 0.18 | 0.96 | 0.74 | 0.64 | 0.18 |
| Neural Network | A | Extra Trees Regression | 0.75(0.75-0.76) | 0.42 | 44585 | 62163 | 0.18 | 0.96 | 0.76 | 0.62 | 0.18 |
| Neural Network | B | Extra Trees Regression | 0.76(0.75-0.76) | 0.46 | 40067 | 66681 | 0.20 | 0.96 | 0.75 | 0.67 | 0.19 |
| Neural Network | C | Extra Trees Regression | 0.77(0.77-0.77) | 0.48 | 39088 | 67660 | 0.19 | 0.96 | 0.71 | 0.67 | 0.20 |
| Neural Network | A | Ridge Regression       | 0.73(0.73-0.74) | 0.49 | 43129 | 63619 | 0.18 | 0.96 | 0.74 | 0.63 | 0.21 |
| Neural Network | B | Ridge Regression       | 0.75(0.74-0.76) | 0.44 | 39388 | 67360 | 0.20 | 0.96 | 0.74 | 0.67 | 0.18 |
| Neural Network | C | Ridge Regression       | 0.78(0.78-0.78) | 0.53 | 38048 | 68700 | 0.19 | 0.95 | 0.68 | 0.68 | 0.21 |

1  
2  
3  
4  
5  
6  
7  
8  
9  
10  
11  
12  
13  
14  
15  
16  
17  
18  
19  
20  
21  
22  
23  
24  
25  
26  
27  
28  
29  
30  
31  
32  
33  
34  
35  
36  
37  
38  
39  
40  
41  
42  
43  
44  
45  
46  
47

|                |   |              |                 |      |       |        |      |      |      |      |      |
|----------------|---|--------------|-----------------|------|-------|--------|------|------|------|------|------|
| Neural Network | A | Normal Value | 0.72(0.71-0.72) | 0.45 | 33193 | 73555  | 0.19 | 0.95 | 0.61 | 0.72 | 0.18 |
| Neural Network | B | Normal Value | 0.74(0.73-0.75) | 0.50 | 37560 | 69188  | 0.20 | 0.96 | 0.71 | 0.69 | 0.20 |
| Neural Network | C | Normal Value | 0.76(0.76-0.76) | 0.41 | 42187 | 64561  | 0.18 | 0.96 | 0.74 | 0.64 | 0.18 |
| Neural Network | A | No Missing   | 0.47(0.45-0.49) | 0.79 | 2628  | 104120 | 0.14 | 0.90 | 0.04 | 0.98 | 0.44 |
| Neural Network | B | No Missing   | 0.70(0.68-0.72) | 0.69 | 23720 | 83028  | 0.23 | 0.94 | 0.52 | 0.81 | 0.31 |
| Neural Network | C | No Missing   | 0.73(0.72-0.73) | 0.57 | 51077 | 55671  | 0.15 | 0.95 | 0.74 | 0.55 | 0.29 |
| Neural Network | D | None         | 0.74(0.73-0.74) | 0.50 | 36925 | 69823  | 0.19 | 0.95 | 0.67 | 0.69 | 0.21 |



# BMJ Open

## Variation in Model Performance by Data Cleanliness and Classification Methods in the Prediction of 30-day ICU Mortality, a US Nationwide Retrospective Cohort and Simulation Study

|                                 |                                                                                                                                                                                                                                                                                                                                                                                                                                                                                                                                                                                |
|---------------------------------|--------------------------------------------------------------------------------------------------------------------------------------------------------------------------------------------------------------------------------------------------------------------------------------------------------------------------------------------------------------------------------------------------------------------------------------------------------------------------------------------------------------------------------------------------------------------------------|
| Journal:                        | <i>BMJ Open</i>                                                                                                                                                                                                                                                                                                                                                                                                                                                                                                                                                                |
| Manuscript ID                   | bmjopen-2020-041421.R2                                                                                                                                                                                                                                                                                                                                                                                                                                                                                                                                                         |
| Article Type:                   | Original research                                                                                                                                                                                                                                                                                                                                                                                                                                                                                                                                                              |
| Date Submitted by the Author:   | 04-Nov-2020                                                                                                                                                                                                                                                                                                                                                                                                                                                                                                                                                                    |
| Complete List of Authors:       | Iwashyna, Theodore; University of Michigan, Internal Medicine; VA Center for Clinical Management Research, Ann Arbor VA Medical Center<br>Ma, Cheng; University of Michigan, Statistics<br>Wang, Xiao Qing; VA Center for Clinical Management Research, Ann Arbor VA Medical Center<br>Seelye, Sarah; VA Center for Clinical Management Research, Ann Arbor VA Medical Center<br>Zhu, Ji; University of Michigan, Department of Statistics<br>Waljee, Akbar; University of Michigan, Gastroenterology; VA Center for Clinical Management Research, Ann Arbor VA Medical Center |
| <b>Primary Subject Heading</b>: | Research methods                                                                                                                                                                                                                                                                                                                                                                                                                                                                                                                                                               |
| Secondary Subject Heading:      | Health services research, Health informatics                                                                                                                                                                                                                                                                                                                                                                                                                                                                                                                                   |
| Keywords:                       | Health informatics < BIOTECHNOLOGY & BIOINFORMATICS, STATISTICS & RESEARCH METHODS, Adult intensive & critical care < INTENSIVE & CRITICAL CARE                                                                                                                                                                                                                                                                                                                                                                                                                                |
|                                 |                                                                                                                                                                                                                                                                                                                                                                                                                                                                                                                                                                                |

SCHOLARONE™  
Manuscripts



I, the Submitting Author has the right to grant and does grant on behalf of all authors of the Work (as defined in the below author licence), an exclusive licence and/or a non-exclusive licence for contributions from authors who are: i) UK Crown employees; ii) where BMJ has agreed a CC-BY licence shall apply, and/or iii) in accordance with the terms applicable for US Federal Government officers or employees acting as part of their official duties; on a worldwide, perpetual, irrevocable, royalty-free basis to BMJ Publishing Group Ltd ("BMJ") its licensees and where the relevant Journal is co-owned by BMJ to the co-owners of the Journal, to publish the Work in this journal and any other BMJ products and to exploit all rights, as set out in our [licence](#).

The Submitting Author accepts and understands that any supply made under these terms is made by BMJ to the Submitting Author unless you are acting as an employee on behalf of your employer or a postgraduate student of an affiliated institution which is paying any applicable article publishing charge ("APC") for Open Access articles. Where the Submitting Author wishes to make the Work available on an Open Access basis (and intends to pay the relevant APC), the terms of reuse of such Open Access shall be governed by a Creative Commons licence – details of these licences and which [Creative Commons](#) licence will apply to this Work are set out in our licence referred to above.

Other than as permitted in any relevant BMJ Author's Self Archiving Policies, I confirm this Work has not been accepted for publication elsewhere, is not being considered for publication elsewhere and does not duplicate material already published. I confirm all authors consent to publication of this Work and authorise the granting of this licence.

**Title:** Variation in Model Performance by Data Cleanliness and Classification Methods in the Prediction of 30-day ICU Mortality, a US Nationwide Retrospective Cohort and Simulation Study

**Authors:**

Theodore J. Iwashyna\*, M.D., PhD (1,2,3)

Cheng Ma\*, B.S. (4)

Xiao Qing Wang, MPH (1)

Sarah Seelye, Ph.D. (1)

Ji Zhu, Ph.D. (4)

Akbar K. Waljee, M.D., M.Sc. (1,2,3)

\*considered co-first authors.

- 1) VA Center for Clinical Management Research, VA Ann Arbor Health Care System, Ann Arbor, MI, USA.
- 2) Department of Internal Medicine, Michigan Medicine, Ann Arbor, MI, USA.
- 3) Michigan Integrated Center for Health Analytics and Medical Prediction (MiCHAMP), Ann Arbor, MI, USA
- 4) Department of Statistics, University of Michigan, Ann Arbor, MI, USA.

**Address correspondence to:** Akbar K. Waljee, M.D. M.Sc., Associate Professor of Medicine, Division of Gastroenterology, Department of Internal Medicine, Michigan Medicine, Ann Arbor Veterans Affairs Medical Center, 2215 Fuller Road, 111D, Ann Arbor, Michigan 48105

Phone: 734-845-5865; Fax: 734-845-3091; E-mail: [awaljee@med.umich.edu](mailto:awaljee@med.umich.edu)

**Keywords:** missing data, risk prediction, machine learning, electronic health record data, random forests

**Word count:** 3,259

**ABSTRACT**

**Objective:** There has been a proliferation of approaches to statistical methods and missing data imputation as electronic health records become more plentiful; however, the relative performance on real-world problems is unclear.

**Materials and Methods:** Using 355,823 ICU hospitalizations at over 100 hospitals in the nationwide VA healthcare system (2014-2017), we systematically varied 3 approaches: how we extracted and cleaned physiologic variables; how we handled missing data (using mean value imputation, random forest, extremely randomized trees (extra-trees regression), ridge regression, normal value imputation, and case-wise deletion); and how we computed risk (using logistic regression, random forest, and neural networks). We applied these approaches in a 70% development sample and tested the results in an independent 30% testing sample. Area under the ROC Curve (AUROC) was used to quantify model discrimination.

**Results:** In 355,823 ICU stays, there were 34,867 deaths (9.8%) within 30 days of admission. The highest AUROC's obtained for each primary classification method were very similar: 0.83 (95% CI [0.83-0.83]) to 0.85 (95% CI 0.84-.0.85). Likewise, there was relatively little variation within classification method by the missing value imputation method used—except when case-wise deletion was applied for missing data.

**Conclusion:** Variation in discrimination was seen as a function of data cleanliness, with logistic regression suffering the most loss of discrimination in the least clean data. Losses in discrimination were not present in random forest and neural networks even in naively extracted data. Data from a large nationwide health system revealed interactions between missing data imputation techniques, data cleanliness, and classification methods for predicting 30-day mortality.

## STRENGTHS AND LIMITATIONS OF THIS STUDY

---

- This study focuses on a large, real world dataset consisting of 355,823 ICU stays at over 100 different facilities.
- Multiple methods of model fitting and missing data imputation were implemented in standardized ways that reflect common practice.
- The approach we used for each implementation is available in an Appendix or via GitHub to allow transparency and reproducibility, and we encourage validation on other datasets.
- Due to high dimensionality of method combinations, this study only considered one outcome, and only considered one standardization method and decided upon an a priori approach within each dataset / categorization model / missingness imputation triad.

For peer review only

## INTRODUCTION

1  
2  
3 Risk adjustment plays an increasingly central role in the organization, care of, and science about critically ill patients[1, 2].  
4  
5 Statistical adjustment, including the handling of missing data, is essential for many performance measurements as well as  
6  
7 pay-for-performance and shared savings systems. It is used to stratify the care of patients for treatments and track quality  
8  
9 improvement efforts over time[3]. It is routinely measured, even in clinical trials, to assess confounder balance between  
10  
11 arms and may form part of RCT enrollment or drug approval criteria[4].  
12  
13  
14  
15

16  
17 As a result, there has been a proliferation of risk scores and missing data imputation tools both for the common task of  
18  
19 short-term mortality prediction and for more specialized tasks. Many statistical tools have been promoted. Rules of thumb  
20  
21 have developed and existed long enough to be critiqued[5-9]. The Transparent Reporting of a multivariable prediction  
22  
23 model for Individual Prognosis Or Diagnosis (TRIPOD) guidelines offer standardization of reporting[10]. Textbooks have  
24  
25 emerged[11]. Yet questions remain on fundamental pragmatic issues: How clean does the data have to be to prevent the  
26  
27 so-called “garbage in, garbage out (GIGO)” phenomenon? How sensitive are methods to missing data and how should it  
28  
29 be handled? Do these analytic decisions interact?  
30  
31  
32  
33

34  
35 To address such questions, we compared the performance of an array of methods on a single standardized problem—the  
36  
37 prediction of 30-day mortality based on demographics, day 1 laboratory results, comorbidities, and diagnoses among  
38  
39 patients admitted to the Intensive Care Unit (ICU) at any hospital in the nationwide Veterans Health Administration  
40  
41 system[12-14]. Using the same set of real ICU admissions, we systematically varied three parameters: the approach used  
42  
43 to extract and clean physiologic variables from the electronic health record; the approach used to handle missing data;  
44  
45 and the approach used to compute the risk. We systematically applied these approaches in a 70% development sample  
46  
47 and tested the results in an independent 30% testing sample, to provide real world comparisons to inform future  
48  
49 pragmatic implementation of risk scores.  
50  
51  
52  
53

## METHODS

## Cohort

Data were drawn from the Veterans Affairs Patient Database (VAPD), which contains daily patient physiology for acute hospitalizations between January 1, 2014 and December 31, 2017. The VAPD includes patient demographics, laboratory results, and diagnoses that are commonly used to predict 30-day mortality from the day of admission. Here, we included data from all ICU hospitalizations on day 1 of each hospitalization. Full details of the VAPD have been published elsewhere[15].

The development of this database was reviewed and approved by the VA Ann Arbor Healthcare System's Institutional Review Board.

Four versions of the dataset were created for each hospitalization on admission: A) raw lab values extracted using only lab test names, B) raw lab values extracted using only Logical Observation Identifiers Names and Codes (LOINC), C) cleaned lab values extracted using both LOINC[16, 17] and searched text lab test names, and D) cleaned lab values converted to Acute Physiology And Chronic Health Evaluation (APACHE) points, extracted using both LOINC and lab test names.

## No Patient and Public Involvement

This research was done without patient involvement. Patients were not invited to comment on the study design and were not consulted to develop patient relevant outcomes or interpret the results. Patients were not invited to contribute to the writing or editing of this document for readability or accuracy.

## Predictor Variables

In our primary analyses, we adjust for 10 laboratory values that were collected within one day of hospital admission. Further patient-level adjustments included demographic characteristics (gender, age, race, and Hispanic ethnicity), 30 comorbidities, and 38 primary diagnoses. The individual comorbidities used in models are defined by methods described in van Walraven's implementation of the Elixhauser comorbidity score[18]. We adjust for 38 primary diagnoses drawn from the Healthcare Cost and Utilization (HCUP) Clinical Classification Software (CCS)[19], which consist of the top 20 most frequent single-level CCS diagnoses and 18 level-one multi-level categories of diagnoses (Appendix A.) In secondary

1 analyses, to emphasize the role of data cleanliness, we estimate risk using *only* the laboratory values since the non-  
2 laboratory values do not vary in data cleanliness and curation.  
3  
4  
5  
6

### 7 **Outcome Variable: 30-day mortality**

8  
9 Our primary outcome variable is 30-day all-cause mortality, defined as death within 30 days of the admission date for the  
10 index hospitalization. Mortality is evaluated using the highly reliable Veterans Administration beneficiary death files which  
11 aggregate from multiple sources[12, 20, 21].  
12  
13  
14  
15  
16  
17

### 18 **Statistical Analysis and Model Development**

19  
20 Random Forests is an ensemble machine learning method that aggregates the results of multiple decision trees fit on  
21 bootstrap samples of the original data[22, 23]. For each decision tree, the original data are bootstrapped to create a new  
22 dataset of the same size and the tree is fit to the new data. Instead of considering all predictors to determine the splitting  
23 criterion at a node, the split variable is chosen from a random subset of variables in order to reduce the correlation  
24 between different trees. Many such trees are grown, creating a ‘forest’. Each observation is classified by each tree, and  
25 the majority classification over all trees is the predicted class. The ability of random forests to learn nonlinear and complex  
26 functions contributes to its predictive performance.  
27  
28  
29  
30  
31  
32  
33  
34  
35  
36  
37

38 The neural network[24] can “learn” to classify samples without manual designed task-specific rules. The algorithm applies  
39 different weights to predictors and uses these transformations in subsequent “layers” of the neural net, culminating in  
40 the output layer with predictions. We applied the random forest and the neural network on our task. A traditional logistic  
41 regression model was also performed and compared.  
42  
43  
44  
45  
46  
47  
48

49 Statistical analyses were performed with Python and the scikit-learn package[25].  
50  
51  
52  
53

### 54 **Training and Testing Sets**

55  
56  
57  
58  
59  
60



1 The dataset was randomly split into a 70% training set and a 30% testing set. The same split was used for all classification  
2 methods. This process was replicated five times (five different training sets and corresponding testing set were generated),  
3  
4 and each time the models were fit on the training set and used to predict the 30-day mortality of the testing set.  
5  
6  
7

## 9 **Missing Data and Imputation**

11 We imputed the missing values before training and testing the models, comparing:  
12  
13

- 14 • “Mean Value”: the mean value of each variable in the training set was used to replace missing values[26].
  - 15 • “Random Forest”: used random forest to impute missing values (missForest)[27].
  - 16 • “Extremely Randomized Trees (Extra-Trees Regression)”: this method is similar to random forest but is faster[28,  
17 29].
  - 18 • “Ridge Regression”: used Bayesian Ridge regression to impute missing values[30].
  - 19 • “Normal Value”[31]: normal values were used to impute missing values—this is common in clinical prediction  
20 contexts in which it is assumed that clinicians order tests they fear are not normal, and therefore the absence of  
21 such a test is a sign that the clinician reviewed other aspects of the patient’s case and judged the odds of  
22 physiologic abnormality so low that testing was not indicated.
  - 23 • “No Missing”: case-wise deletion[32].
- 24  
25  
26  
27  
28  
29  
30  
31  
32  
33  
34  
35  
36  
37  
38  
39

## 40 **Variable Importance and Partial Dependence Plots**

41 Predictor variable importance was evaluated for random forests[33]. When classifying a sample using a decision tree, a  
42 predictor was used at each node. Predictors that appear more frequently and that reduce the misclassification more  
43 substantially are considered more important. By combining all trees in a random forest model, we assessed the variable  
44 importance of each predictor. Different values of the same predictor may have different effects on the prediction. We  
45 plotted the Partial Dependence Plots[30] to show how the value of predictors affects the prediction of 30-day mortality.  
46  
47  
48  
49  
50  
51  
52  
53 Partial dependence plots were used to visualize non-linearity among variables.  
54  
55  
56  
57  
58  
59  
60

## RESULTS

### Cohort Description

The cohort comprised 355,823 ICU hospitalizations at over 100 different hospitals, as described elsewhere[15]. The mean age of the cohort was 66.9 years, and there were 34,867 deaths within 30-days of admission, a primary outcome event rate of 9.8% (Table 1.)

**Table 1.** ICU Patient Demographics

| Variables                       | ICU Only Cohort |
|---------------------------------|-----------------|
| Hospitalizations, N             | 355,823         |
| Age, mean (SD), y               | 66.9 (11.6)     |
| Male, N (%)                     | 341,579 (96.0)  |
| Race, N (%)                     |                 |
| White                           | 256,293 (72.0)  |
| Black or African American       | 73,855 (20.8)   |
| Other                           | 25,675 (7.2)    |
| Hispanic, N (%)                 | 20,532 (5.8)    |
| 30-day Mortality, N (%)         | 34,867 (9.8)    |
| Length of Stay, mean (SD), days | 9.5 (13.0)      |

Rates of data missingness for each laboratory value in each dataset are shown in Table 2. Dataset A has a high proportion of missing laboratory values for blood urea nitrogen (0.84) and hematocrit (0.85) compared to datasets B and C. This is due to dataset A using a single, broad lab test name to identify laboratory values: “BUN” for blood urea nitrogen and “hematocrit” for hematocrit. In contrast, datasets B and C incorporated LOINC codes for BUN and HCT, which result in fewer missing laboratory values.

**Table 2.** Proportion of Labs Missing

| Dataset | Albumin (albval) | Bilirubin (bili) | Blood urea nitrogen (bun) | Creatinine (creat) | Glucose (glucose) | Hematocrit (hct) | Partial Pressure (pao2) | pH (pa) | Sodium (na) | White Blood Cell (wbc) |
|---------|------------------|------------------|---------------------------|--------------------|-------------------|------------------|-------------------------|---------|-------------|------------------------|
| A       | 0.39             | 0.42             | 0.84                      | 0.13               | 0.07              | 0.85             | 0.66                    | 0.14    | 0.11        | 0.13                   |
| B       | 0.38             | 0.42             | 0.13                      | 0.13               | 0.06              | 0.12             | 0.65                    | 0.44    | 0.11        | 0.13                   |
| C       | 0.39             | 0.45             | 0.13                      | 0.12               | 0.06              | 0.11             | 0.69                    | 0.64    | 0.11        | 0.13                   |

### Using all Data for Model Development

1 Figure 1 shows the AUC scores of different classification models and imputation methods in the primary analysis. The  
2 highest AUC's obtained for each primary classification method (rows of the figure: logistic regression, random forest, or a  
3 neural network) were very similar: AUC's of 0.83 to 0.85. Likewise, there was relatively little variation within classification  
4 method by the missing value imputation method used, be it mean value imputation, random forest, extremely randomized  
5 trees (extra-trees regression), ridge regression, or normal value imputation. All models suffered dramatic losses in  
6 discrimination when case-wise deletion was used for missing data in the least clean dataset (far right columns). Full model  
7 performance for each condition can be seen in Appendix B.  
8  
9  
10  
11  
12  
13  
14

15  
16  
17  
18 Variation in discrimination was seen, however, across classification methods, as a function of data cleanliness. (Note that  
19 the analyst was blinded during the analysis to how each dataset was developed, and hence did not know which was  
20 "cleanest"). In the logistic regression model developed using the least clean data (dataset A had raw lab values extracted  
21 using only lab test names), performance was always lower than the performance with the more complete and clean  
22 datasets—by AUC's of 0.05 to about 0.1,  $p$ -value < 0.05). Similarly, performance in dataset B (extracted using LOINC codes  
23 without unit standardization) was lower and more unstable for mean value imputation and ridge regression. In marked  
24 contrast, neither random forests nor neural networks showed such reduced performance when developed in less clean  
25 data—in no case did the AUC degradations exceed 0.025 despite similar optimal performance.  
26  
27  
28  
29  
30  
31  
32  
33  
34  
35  
36  
37

### 38 **Secondary Analysis Using only Laboratory Values**

39  
40 The primary analysis presented above considers the real world case in which demographics, diagnoses, and laboratory  
41 values are used in combination with risk model prediction. Yet, of these, only laboratory values were subject to variation  
42 in cleanliness. We, therefore, conducted a secondary analysis using only laboratory values to assess more clearly the  
43 impact of data quality. Results are shown in Figure 2.  
44  
45  
46  
47  
48  
49  
50

51 Average model performance with this much smaller group of predictors is, as expected, somewhat lower with less data—  
52 optimal AUC's typically range from 0.73 to 0.78 across combinations of classification model and missing data imputation.  
53  
54 No uniformly superior strategy is evident, save markedly lower performance of case-wise deletion in the least clean  
55  
56  
57  
58  
59

dataset (A). As before, logistic regression shows markedly reduced discrimination when developed in the least clean data set. Neural networks show consistent performance.

Also notable is the marked reduction of discrimination of random forest models and neural network models regardless of the missing data imputation model used within dataset D. Dataset D has the “cleanest” data, in that it has hand-curated inclusion criteria, standardization of units, and conversion of values from their continuous scale to a semi-quantitative set of “points” as is done in the APACHE scoring algorithms. Attempting to work with such standardized point values as inputs consistently resulted in markedly worse discrimination in random forest models and neural network models than using other “less clean” datasets (the difference between Dataset D and other datasets is significant with a p-value < 0.05).

### Variable Importance

The most important predictors of 30-day mortality were age and laboratory values. Age had the highest importance scores, regardless of which dataset was used, indicating that age is the most important variable when predicting 30-day mortality.

The 10 laboratory values also had high importance scores. For datasets A, B, and C, laboratory values fell in the top-13 most important variables, and there were at least 8 laboratory values in the top-10 most important variables. However, for dataset D, there were only 6 laboratory values in the top-10 most important variables, and the variable white blood cell score ranked 20<sup>th</sup>. This may indicate that transforming laboratory values to APACHE scores results in the loss of information contained in the original values and negatively influences the performance of the random forest model.

### Partial Dependence Plots

As it is hard to visualize the relationship between multiple predictors and the outcome, we created partial dependence plots to show the effect of predictors on the outcome[34]. The plots can also show whether the relationship between a specific predictor and the outcome is linear, quadratic, monotonic, or more complex. Further analysis can be done by combining the partial dependence plots and medical knowledge. **Figure 3** and **Figure 4** are the partial dependence plots for the pH score and the PaO<sub>2</sub> score. We will take these as examples to show how the value of predictors in different datasets affects 30-day mortality. The X-axis is the value of the predictor. For each value of the predictor, the Y-axis is the averaged model output for all observations with the corresponding value of the predictor. A higher partial dependence

1 value corresponds to a higher risk of mortality. As we know, the normal value of the pH score is 7.4, and both higher values  
2 and lower values are abnormal. Typically, abnormal values lead to a larger risk of death. Therefore, a U-shaped partial  
3 dependence plot is to be expected for datasets A, B, and C. However, only the plot for dataset C is U-shaped. This is  
4 because dataset C is "cleaner" than datasets A and B, and the models can learn the real effect of pH score on 30-day  
5 mortality. Datasets A and B are not as clean as dataset C, as some other variables are presented in these datasets as pH  
6 score. Thus, it is difficult for the models to utilize the pH score variable in datasets A and B. This result indicates that  
7 cleaner variables benefits the classification models. However, not all variables have this problem. For most other variables  
8 such as the PaO<sub>2</sub> score, the plots of datasets A, B, and C have similar trends.  
9  
10  
11  
12  
13  
14  
15  
16  
17  
18  
19

## 20 DISCUSSION

21 We used real data from a large nationwide health system to explore the interaction between missing data imputation  
22 techniques, data cleanliness, and classification methods for the common problem of predicting 30-day mortality in a hold-  
23 out testing dataset. In brief, we found that any of several imputation techniques other than case-wise deletion performed  
24 equivalently in terms of discrimination, regardless of data cleanliness or classification method used. We found that logistic  
25 regression showed worse discrimination with less carefully cleaned data than did random forest or neural networks.  
26  
27 Random forest models (and to a degree, neural networks) displayed diminished discrimination when given data that had  
28 been too highly cleaned and standardized prior to use.  
29  
30  
31  
32  
33  
34  
35  
36  
37  
38  
39  
40

### 41 Relationship to Past Research

42 Missing data are ubiquitous in large datasets. Even when missingness is completely at random, missing data lead to  
43 significant loss in statistical power and predictive ability[32]. We have previously found that the Random Forest method  
44 consistently produced the lowest imputation error compared to commonly used imputation methods[26]. Random Forest  
45 had the smallest prediction difference when 10-30% of the laboratory data was missing. Our present analysis of real data  
46 shows that as more specialized laboratory values are introduced into the prediction setting, much higher levels of  
47 missingness may be present. We thereby extend the previous finding that Random Forest continues to perform well for  
48  
49  
50  
51  
52  
53  
54  
55  
56  
57  
58  
59  
60

1 missing data. Our findings on the poor performance of case-wise deletion as an approach to handling missing data are in  
2 agreement with mainstream recommendations for more than two decades[32].  
3  
4  
5

6  
7 Our findings on missing data are of note because of the distinctive, yet real world, way in which missing data were  
8 generated. There were two missingness processes. First, clinicians in routine practice only sometimes order any given  
9 laboratory, and thus the presence or absence of an order may itself provide prognostic importance. [35] Second, an effort  
10 to identify all target laboratory values may or may not succeed. Even in a large system with a strong tradition of  
11 centralization, laboratory labeling practices vary over time and clinical insight is often necessary to distinguish valid  
12 laboratory tests[36]. For any given data pull, it is not trivial to understand which missing values represent failure to find  
13 data that exist versus representing true missingness. Past work has rarely explicitly considered these distinct missingness-  
14 generating processes (in addition to true missingness at random) at their distinct implications.  
15  
16  
17  
18  
19  
20  
21  
22  
23  
24  
25  
26  
27

28 The finding of poorer discrimination of Random Forest in models where the data were fully standardized and cleaned was  
29 not anticipated given past literature. The APACHE score was designed to simplify the lab results and to help doctors predict  
30 mortality [2]. Even in its more recent incarnations, APACHE transforms continuous lab results into discrete acute  
31 physiology scores[37]. Our data suggest that transforming lab results to APACHE scores is not necessary for Random Forest  
32 and may even lead to the loss of information[23]. Remarkably, even standardization to equivalent units across institutions  
33 may not be necessary—but at the same time, this means that sources of variance other than simply the laboratory value  
34 may also be subtly incorporated into risk-prediction with non-standardized ways. It is a case-specific decision as to  
35 whether incorporation of such variance is helpful for a given task or is a source of bias.  
36  
37  
38  
39  
40  
41  
42  
43  
44  
45  
46  
47

## 48 **Implications**

49  
50 Our findings have implications for both practitioners seeking to implement a given prediction rule and scientists interested  
51 in risk-prediction generally. For practitioners, no given method yields consistently superior results in terms of  
52 discrimination. Therefore, other performance considerations, whether psychometric or implementation ease, may play  
53  
54  
55  
56  
57  
58  
59  
60

1 an important role. They also suggest that missing data imputation approaches other than case-wise deletion during  
2 development are mandatory.  
3  
4  
5  
6

7 Our results also note that Random Forests and neural networks were strikingly robust to even quite naively prepared data,  
8 in contrast to logistic regression. This suggests that the truth of the oft-quoted aphorisms about “garbage in, garbage out”  
9 may depend on the categorization model and missing data imputation method used. In situations where ascertainment  
10 and cleaning of data are more costly, random forests may offer pragmatic advantages if these findings are replicable.  
11  
12  
13  
14  
15

## 16 **Strengths and Limitations**

17  
18  
19  
20  
21  
22 Strengths of our analysis include its use of real world data, with real world data generation and missingness-generation  
23 problems on an established problem encountered by medical researchers and clinicians. We also used multiple methods  
24 implemented in standardized ways. The approach we used for each implementation is available in an Appendix or via  
25  
26  
27  
28  
29  
30  
31  
32  
33  
34  
35  
36  
37  
38  
39  
40  
41  
42  
43  
44  
45  
46  
47  
48  
49  
50  
51  
52  
53  
54  
55  
56  
57  
58  
59  
60  
GitHub to allow transparency and reproducibility.

Limitations of our analysis stem fundamentally from the nearly infinite combinations of analysis factors that might be  
varied, and our inability to explore such a high dimensional space. Thus we only considered one outcome and one  
standardization method, and decided upon an a priori approach for each combination of dataset, categorization model,  
and missingness imputation method used. Other outcomes and other possible data structures (such as using trends in  
data) may yield different answers. We focus on discrimination, as measured by AUC, but other measurement properties  
are assuredly also important. We also focused on individual-level prediction, as opposed to considering the impact on  
hospital-level quality assessment or other tasks for which these results may be used.

## 51 **CONCLUSION**

52  
53  
54  
55  
56  
57  
58  
59  
60  
In sum, our results suggest that there is little variation in discrimination among different statistical classification models  
in well-cleaned data using modern missing data imputation techniques. As such, the decision about which of the well-

1 performing imputation and adjustment methods to use can be made based on other factors relevant to the particular  
2 application—as long as the lower performing methods are avoided. If these findings are replicated in other data with other  
3  
4 outcomes, they may help inform pragmatic model selection.  
5  
6  
7  
8  
9  
10  
11  
12  
13  
14  
15  
16  
17  
18  
19  
20  
21  
22  
23  
24  
25  
26  
27  
28  
29  
30  
31  
32  
33  
34  
35  
36  
37  
38  
39  
40  
41  
42  
43  
44  
45  
46  
47  
48  
49  
50  
51  
52  
53  
54  
55  
56  
57  
58  
59  
60

For peer review only



**Figure Captions**

1  
2 Figure 1. AUC Scores, Full Model

3  
4 Figure 2. AUC Scores for lab-only predictors

5  
6 Figure 3. Partial Dependence Plots for pH

7  
8 Figure 4. Partial Dependence Plots for PaO<sub>2</sub>

9  
10  
11  
12  
13  
14  
15  
16  
17  
18  
19  
20  
21  
22  
23  
24  
25  
26  
27  
28  
29  
30  
31  
32  
33  
34  
35  
36  
37  
38  
39  
40  
41  
42  
43  
44  
45  
46  
47  
48  
49  
50  
51  
52  
53  
54  
55  
56  
57  
58  
59  
60

For peer review only

## ACKNOWLEDGEMENTS

### Author Contributions

**Theodore J. Iwashyna:** Conceptualization, Investigation, Methodology, Supervision, Writing – original draft, Writing – review & editing

**Cheng Ma:** Formal analysis, software, visualization, writing-original draft, and writing-review & editing

**Xiao Qing Wang:** Data curation; Writing – original draft; Writing – review & editing

**Sarah Seelye :** Writing – original draft; Writing – review & editing

**Ji Zhu :** Conceptualization, Methodology, Supervision, Writing – original draft, Writing – review & editing

**Akbar K. Waljee:** Conceptualization, Methodology, Supervision, Writing – original draft, Writing – review & editing

**Declarations of funding interests:** This work was supported by a career development grant award [CDA 11-217 to A.K.W] and a Merit Review Award Number [IIR 16-024 to A.K.W, 17-045 to T.J.I.] from the United States Department of Veterans Affairs Health Services Research. The content is solely the responsibility of the authors and does not necessarily represent the official views of the University of Michigan, the Veterans Affairs, the U.S. Government, or the National Institutes of Health.

**Disclosures:** The authors declare there are no conflicts to disclose

**Guarantor of the article:** Akbar K. Waljee the submission's guarantor, takes responsibility for the integrity of the work as a whole, from inception to published article.

### Licensing Statement:

I, Akbar Waljee, as the Submitting Author have the right to grant and does grant on behalf of all authors of the Work (as defined in the below author license), an exclusive license and/or a non-exclusive license for contributions from authors who are: i) UK Crown employees; ii) where BMJ has agreed a CC-BY license shall apply, and/or iii) in accordance with the terms applicable for US Federal Government officers or employees acting as part of their official duties; on a worldwide, perpetual, irrevocable, royalty-free basis to BMJ Publishing Group Ltd ("BMJ") its licensees and where the relevant Journal is co-owned by BMJ to the co-owners of the Journal, to publish the Work in BMJ Open and any other BMJ products and to exploit all rights, as set out in our [license](#).

The Submitting Author accepts and understands that any supply made under these terms is made by BMJ to the Submitting Author unless you are acting as an employee on behalf of your employer or a postgraduate student of an affiliated institution which is paying any applicable article publishing charge ("APC") for Open Access articles. Where the Submitting Author wishes to make the Work available on an Open Access basis (and intends to pay the relevant APC), the terms of reuse of such Open Access shall be governed by a Creative Commons license – details of these licenses and which [Creative Commons](#) license will apply to this Work are set out in our license referred to above.

### Data Sharing Statement:

Appendices and statistical code are available via Github at <https://github.com/CCMRcodes/GIVO> . The dataset cannot be disseminated due to inclusion of sensitive patient information under VA regulations.

1  
2  
3  
4  
5  
6  
7  
8  
9  
10  
11  
12  
13  
14  
15  
16  
17  
18  
19  
20  
21  
22  
23  
24  
25  
26  
27  
28  
29  
30  
31  
32  
33  
34  
35  
36  
37  
38  
39  
40  
41  
42  
43  
44  
45  
46  
47  
48  
49  
50  
51  
52  
53  
54  
55  
56  
57  
58  
59  
60

For peer review only

## REFERENCES

- 1 [1] Iezzoni LI. Risk adjustment for measuring health care outcomes. 4th ed. Chicago, Ill. Arlington, VA: Health  
2 Administration Press; AUPHA; 2013.
- 3 [2] Lane-Fall MB, Neuman MD. Outcomes measures and risk adjustment. *Int Anesthesiol Clin*. 2013;51:10-21.
- 4 [3] Quality AfHRa. Part II. Introduction to Measures of Quality (continued). Rockville, MD.
- 5 [4] Bernard GR, Vincent JL, Laterre PF, LaRosa SP, Dhainaut JF, Lopez-Rodriguez A, et al. Efficacy and safety of  
6 recombinant human activated protein C for severe sepsis. *N Engl J Med*. 2001;344:699-709.
- 7 [5] Harrell FE, Lee KL, Califf RM, Pryor DB, Rosati RA. Regression modelling strategies for improved prognostic prediction.  
8 *Stat Med*. 1984;3:143-52.
- 9 [6] Harrell FE, Lee KL, Mark DB. Multivariable prognostic models: issues in developing models, evaluating assumptions  
10 and adequacy, and measuring and reducing errors. *Stat Med*. 1996;15:361-87.
- 11 [7] van Smeden M, de Groot JA, Moons KG, Collins GS, Altman DG, Eijkemans MJ, et al. No rationale for 1 variable per 10  
12 events criterion for binary logistic regression analysis. *BMC Med Res Methodol*. 2016;16:163.
- 13 [8] Riley RD, Snell KI, Ensor J, Burke DL, Harrell FE, Jr., Moons KG, et al. Minimum sample size for developing a  
14 multivariable prediction model: PART II - binary and time-to-event outcomes. *Stat Med*. 2019;38:1276-96.
- 15 [9] van Smeden M, Moons KG, de Groot JA, Collins GS, Altman DG, Eijkemans MJ, et al. Sample size for binary logistic  
16 prediction models: Beyond events per variable criteria. *Stat Methods Med Res*. 2019;28:2455-74.
- 17 [10] Moons KG, Altman DG, Reitsma JB, Ioannidis JP, Macaskill P, Steyerberg EW, et al. Transparent Reporting of a  
18 multivariable prediction model for Individual Prognosis or Diagnosis (TRIPOD): explanation and elaboration. *Ann Intern  
19 Med*. 2015;162:W1-73.
- 20 [11] Steyerberg EW, ProQuest (Firm). Clinical prediction models a practical approach to development, validation, and  
21 updating. New York: Springer; 2009. p. xxviii, 497 p.
- 22 [12] Render ML, Kim HM, Welsh DE, Timmons S, Johnston J, Hui S, et al. Automated intensive care unit risk adjustment:  
23 results from a National Veterans Affairs study. *Crit Care Med*. 2003;31:1638-46.
- 24 [13] Render ML, Deddens J, Freyberg R, Almenoff P, Connors AF, Wagner D, et al. Veterans Affairs intensive care unit risk  
25 adjustment model: validation, updating, recalibration. *Crit Care Med*. 2008;36:1031-42.
- 26 [14] Render ML, Freyberg RW, Hasselbeck R, Hofer TP, Sales AE, Deddens J, et al. Infrastructure for quality  
27 transformation: measurement and reporting in veterans administration intensive care units. *BMJ Qual Saf*. 2011;20:498-  
28 507.
- 29 [15] Wang XQ, Vincent BM, Wiitala WL, Luginbill KA, Viglianti EM, Prescott HC, et al. Veterans Affairs patient database  
30 (VAPD 2014-2017): building nationwide granular data for clinical discovery. *BMC Med Res Methodol*. 2019;19:94.
- 31 [16] McDonald CJ, Huff SM, Suico JG, Hill G, Leavelle D, Aller R, et al. LOINC, a universal standard for identifying  
32 laboratory observations: a 5-year update. *Clin Chem*. 2003;49:624-33.
- 33 [17] Forrey AW, McDonald CJ, DeMoor G, Huff SM, Leavelle D, Leland D, et al. Logical observation identifier names and  
34 codes (LOINC) database: a public use set of codes and names for electronic reporting of clinical laboratory test results.  
35 *Clin Chem*. 1996;42:81-90.
- 36 [18] van Walraven C, Austin PC, Jennings A, Quan H, Forster AJ. A modification of the Elixhauser comorbidity measures  
37 into a point system for hospital death using administrative data. *Med Care*. 2009;47:626-33.
- 38 [19] HCUP-US Tools & Software Page. 2019.
- 39 [20] Hooper TI, Gackstetter GD, Leardmann CA, Boyko EJ, Pearse LA, Smith B, et al. Early mortality experience in a large  
40 military cohort and a comparison of mortality data sources. *Popul Health Metr*. 2010;8:15.
- 41 [21] Prescott HC, Kepreos KM, Wiitala WL, Iwashyna TJ. Temporal Changes in the Influence of Hospitals and Regional  
42 Healthcare Networks on Severe Sepsis Mortality. *Crit Care Med*. 2015;43:1368-74.
- 43 [22] Breiman L. Classification and regression trees. New York, NY: Chapman & Hall; 1993.
- 44 [23] Breiman L. Random Forests. *Machine Learning*. 2001;45:5-32.
- 45 [24] Omidvar O, Dayhoff JE, ScienceDirect (Online service). Neural networks and pattern recognition. San Diego, Calif.:  
46 Academic Press; 1998.
- 47 [25] Pedregosa F, Varoquaux G, Gramfort A, Michel V, Thirion B, Grisel O, et al. Scikit-learn: Machine learning in Python.  
48 *Journal of machine learning research*. 2011;12:2825-30.

- 1 [26] Waljee AK, Mukherjee A, Singal AG, Zhang Y, Warren J, Balis U, et al. Comparison of imputation methods for missing  
2 laboratory data in medicine. *BMJ Open*. 2013;3.
- 3 [27] Stekhoven DJ, Buhlmann P. MissForest--non-parametric missing value imputation for mixed-type data.  
4 *Bioinformatics*. 2012;28:112-8.
- 5 [28] Geurts P, Ernst D, Wehenkel L. Extremely randomized trees. *Machine Learning*. 2006;63:3-42.
- 6 [29] Maree R, Geurts P, Wehenkel L. Random subwindows and extremely randomized trees for image classification in  
7 cell biology. *BMC Cell Biol*. 2007;8 Suppl 1:S2.
- 8 [30] Hastie T, Friedman J, Tibshirani R, SpringerLink (Online service). *The Elements of Statistical Learning Data Mining,  
9 Inference, and Prediction*. New York, NY: Springer New York : Imprint: Springer; 2001.
- 10 [31] Knaus WA, Zimmerman JE, Wagner DP, Draper EA, Lawrence DE. APACHE-acute physiology and chronic health  
11 evaluation: a physiologically based classification system. *Crit Care Med*. 1981;9:591-7.
- 12 [32] Allison PD, Sage Publications. *Missing data*. Thousand Oaks, [Calif.] ; London: SAGE; 2002. p. 1 online resource (vi, 91  
13 p.).
- 14 [33] Louppe G, Wehenkel L, Suter A, Geurts P. Understanding variable importances in forests of randomized trees.  
15 *Proceedings of the 26th International Conference on Neural Information Processing Systems - Volume 1*. Lake Tahoe,  
16 Nevada: Curran Associates Inc.; 2013. p. 431-9.
- 17 [34] Friedman JH. Greedy Function Approximation: A Gradient Boosting Machine. *The Annals of Statistics*. 2001;29:1189-  
18 232.
- 19 [35] Agniel D, Kohane IS, Weber GM. Biases in electronic health record data due to processes within the healthcare  
20 system: retrospective observational study. *BMJ*. 2018;361:k1479.
- 21 [36] Wiitala WL, Vincent BM, Burns JA, Prescott HC, Waljee AK, Cohen GR, et al. Variation in Laboratory Test Naming  
22 Conventions in EHRs Within and Between Hospitals: A Nationwide Longitudinal Study. *Med Care*. 2019;57:e22-e7.
- 23 [37] Zimmerman JE, Kramer AA, McNair DS, Malila FM. Acute Physiology and Chronic Health Evaluation (APACHE) IV:  
24 hospital mortality assessment for today's critically ill patients. *Crit Care Med*. 2006;34:1297-310.
- 25  
26  
27  
28  
29  
30  
31  
32  
33  
34  
35  
36  
37  
38  
39  
40  
41  
42  
43  
44  
45  
46  
47  
48  
49  
50  
51  
52  
53  
54  
55  
56  
57  
58  
59  
60



Figure 1: AUC Scores, Full Model



Figure 2. AUC Scores for lab-only predictors



2  
3  
4  
5  
6  
7  
8  
9  
10  
11  
12  
13  
14  
15  
16  
17  
18  
19  
20  
21  
22  
23  
24



For peer review only - <http://bmjopen.bmj.com/site/about/guidelines.xhtml>

Figure 3: Partial Dependence Plots for pH



Dataset A



Dataset B



Dataset C



Dataset D



For peer review only - <http://bmjopen.bmj.com/site/about/guidelines.xhtml>

Figure 4: Partial Dependence Plots PaO2

1  
2  
3 **Appendix A.** Patient-level variables included in models  
4  
5  
6

7  
8  
9  
10  
11  
12  
13  
14  
15  
16  
17  
18  
19  
20  
21  
22  
23  
24  
25  
26  
27  
28  
29  
30  
31  
32  
33  
34  
35  
36  
37  
38  
39  
40  
41  
42  
43  
44  
45  
46  
47  
48  
49  
50  
51  
52  
53  
54  
55  
56  
57  
58  
59  
60

|                                                  |                                                                                                                                                                                                                                                                                                                                                                                                                                                                                                                                                                                                                                                                                                                                                                                                                                                                                                                                                                                                                                                                                                                                                                                                                                                                  |
|--------------------------------------------------|------------------------------------------------------------------------------------------------------------------------------------------------------------------------------------------------------------------------------------------------------------------------------------------------------------------------------------------------------------------------------------------------------------------------------------------------------------------------------------------------------------------------------------------------------------------------------------------------------------------------------------------------------------------------------------------------------------------------------------------------------------------------------------------------------------------------------------------------------------------------------------------------------------------------------------------------------------------------------------------------------------------------------------------------------------------------------------------------------------------------------------------------------------------------------------------------------------------------------------------------------------------|
| Demographics                                     | Gender, Age, Race (White, Black or African American, Asian, Native Hawaiian or other Pacific Islander, Unknown), Hispanic ethnicity                                                                                                                                                                                                                                                                                                                                                                                                                                                                                                                                                                                                                                                                                                                                                                                                                                                                                                                                                                                                                                                                                                                              |
| Comorbidities, included in Elixhauser            | Hypertension, Congestive Heart Failure, Cardiac Arrhythmia, Valvular Disease, Pulmonary Circulation Disorders, Peripheral Vascular Disorders, Paralysis, Other Neurological Disorders, Chronic Pulmonary Disease, Diabetes Uncomplicated, Diabetes Complicated, Hypothyroidism, Renal Failure, Liver Disease, Peptic Ulcer Disease excluding bleeding, AIDS/HIV, Lymphoma, Metastatic Cancer, Solid Tumor without Metastasis, Rheumatoid Arthritis/Collagen, Coagulopathy, Obesity, Weight Loss, Fluid and Electrolyte Disorders, Blood Loss Anemia, Deficiency Anemia, Alcohol Abuse, Drug Abuse, Psychoses, Depression                                                                                                                                                                                                                                                                                                                                                                                                                                                                                                                                                                                                                                         |
| Diagnoses, HCUP CCS single-level and multi-level | <p>Top 20 most frequent single-level CCS diagnoses:<br/>Congestive Heart Failure (non-hypertensive), Non-specific Chest Pain, Coronary Atherosclerosis and Other Heart Disease, Cardiac Dysrhythmias, Alcohol-related Disorders, Septicemia (except in labor), Chronic Obstructive Pulmonary Disease and Bronchiectasis, Pneumonia, Skin and Subcutaneous Tissue Infections, Osteoarthritis, Complication of Device (implant or graft), Complications of Surgical Procedures or Medical Care, Diabetes Mellitus with Complications, Respiratory Failure, Urinary Tract Infections, Renal Failure, Spondylosis, Acute Myocardial Infarction, Fluid and Electrolyte Disorders, Gastrointestinal Hemorrhage</p> <p>18 level 1 multi-level CCS categories:<br/>Infectious and Parasitic Diseases, Neoplasms, Endocrine Disorders, Anemia, Mental Illness, Diseases of the Nervous System, Diseases of the Circulatory System, Diseases of the Respiratory System, Diseases of the Digestive System, Diseases of the Genitourinary System, Complications of Pregnancy or Childbirth, Skin Disease, Diseases of the Musculoskeletal System, Congenital Anomalies, Perinatal Conditions, Injury and Poisoning, Other Health Status Conditions, Other Residual Codes</p> |
| Laboratory values                                | Albumin, Bilirubin, Blood Urea Nitrogen, Creatinine, Glucose, Hematocrit, Partial pressure of oxygen score, pH score, Sodium, White Blood Cell                                                                                                                                                                                                                                                                                                                                                                                                                                                                                                                                                                                                                                                                                                                                                                                                                                                                                                                                                                                                                                                                                                                   |

## Appendix B

Table B.1: Model Performances (Full Model)

| Classification Method | Dataset | Imputation Method      | AUROC (95%CI)   | Optimal Cutoff | Predicted Cases |          | Accurate Rate |          | Sensitivity | Specificity | Brier Score |
|-----------------------|---------|------------------------|-----------------|----------------|-----------------|----------|---------------|----------|-------------|-------------|-------------|
|                       |         |                        |                 |                | Death           | Survival | Death         | Survival |             |             |             |
| Logistic Regression   | A       | Mean Value             | 0.78(0.76-0.80) | 0.48           | 37199           | 69549    | 0.21          | 0.96     | 0.74        | 0.69        | 0.19        |
| Logistic Regression   | B       | Mean Value             | 0.79(0.75-0.83) | 0.46           | 34915           | 71833    | 0.24          | 0.97     | 0.80        | 0.72        | 0.17        |
| Logistic Regression   | C       | Mean Value             | 0.83(0.83-0.83) | 0.46           | 35970           | 70778    | 0.23          | 0.97     | 0.79        | 0.71        | 0.17        |
| Logistic Regression   | A       | Random Forest          | 0.75(0.72-0.78) | 0.49           | 39528           | 67220    | 0.18          | 0.95     | 0.69        | 0.66        | 0.21        |
| Logistic Regression   | B       | Random Forest          | 0.82(0.82-0.82) | 0.49           | 31996           | 74752    | 0.25          | 0.97     | 0.77        | 0.75        | 0.17        |
| Logistic Regression   | C       | Random Forest          | 0.83(0.83-0.84) | 0.46           | 36017           | 70731    | 0.23          | 0.97     | 0.79        | 0.71        | 0.17        |
| Logistic Regression   | A       | Extra Trees Regression | 0.74(0.72-0.76) | 0.46           | 45762           | 60986    | 0.17          | 0.96     | 0.74        | 0.61        | 0.21        |
| Logistic Regression   | B       | Extra Trees Regression | 0.82(0.81-0.82) | 0.47           | 33642           | 73106    | 0.25          | 0.97     | 0.79        | 0.74        | 0.17        |
| Logistic Regression   | C       | Extra Trees Regression | 0.83(0.83-0.84) | 0.47           | 34579           | 72169    | 0.24          | 0.97     | 0.78        | 0.73        | 0.17        |
| Logistic Regression   | A       | Ridge Regression       | 0.79(0.77-0.82) | 0.46           | 38579           | 68169    | 0.21          | 0.97     | 0.78        | 0.68        | 0.18        |
| Logistic Regression   | B       | Ridge Regression       | 0.80(0.78-0.83) | 0.46           | 35034           | 71714    | 0.24          | 0.97     | 0.80        | 0.72        | 0.17        |

1  
2  
3  
4  
5  
6  
7  
8  
9  
10  
11  
12  
13  
14  
15  
16  
17  
18  
19  
20  
21  
22  
23  
24  
25  
26  
27  
28  
29  
30  
31  
32  
33  
34  
35  
36  
37  
38  
39  
40  
41  
42  
43  
44  
45  
46  
47

|                     |   |                  |                 |      |       |       |      |      |      |      |      |
|---------------------|---|------------------|-----------------|------|-------|-------|------|------|------|------|------|
| Logistic Regression | C | Ridge Regression | 0.83(0.83-0.84) | 0.47 | 35220 | 71528 | 0.23 | 0.97 | 0.78 | 0.72 | 0.17 |
| Logistic Regression | A | Normal Value     | 0.76(0.73-0.79) | 0.50 | 37392 | 69356 | 0.18 | 0.95 | 0.63 | 0.68 | 0.22 |
| Logistic Regression | B | Normal Value     | 0.80(0.76-0.83) | 0.50 | 30977 | 75771 | 0.26 | 0.97 | 0.76 | 0.76 | 0.17 |
| Logistic Regression | C | Normal Value     | 0.83(0.83-0.83) | 0.46 | 35676 | 71072 | 0.23 | 0.97 | 0.78 | 0.72 | 0.17 |
| Logistic Regression | A | No Missing       | 0.73(0.72-0.74) | 0.43 | 37658 | 69090 | 0.18 | 0.95 | 0.66 | 0.68 | 0.18 |
| Logistic Regression | B | No Missing       | 0.8(0.80-0.81)  | 0.42 | 33153 | 73595 | 0.24 | 0.97 | 0.76 | 0.74 | 0.14 |
| Logistic Regression | C | No Missing       | 0.82(0.82-0.82) | 0.44 | 35333 | 71415 | 0.22 | 0.96 | 0.76 | 0.72 | 0.16 |
| Logistic Regression | D | None             | 0.83(0.83-0.83) | 0.47 | 34184 | 72564 | 0.24 | 0.97 | 0.78 | 0.73 | 0.17 |
| Random Forest       | A | Mean Value       | 0.84(0.84-0.84) | 0.12 | 32330 | 74418 | 0.26 | 0.97 | 0.79 | 0.75 | 0.07 |
| Random Forest       | B | Mean Value       | 0.85(0.84-0.85) | 0.11 | 32642 | 74106 | 0.26 | 0.97 | 0.80 | 0.75 | 0.07 |
| Random Forest       | C | Mean Value       | 0.85(0.85-0.85) | 0.11 | 33548 | 73200 | 0.25 | 0.97 | 0.81 | 0.74 | 0.07 |
| Random Forest       | A | Random Forest    | 0.84(0.84-0.84) | 0.12 | 32659 | 74089 | 0.25 | 0.97 | 0.78 | 0.75 | 0.07 |
| Random Forest       | B | Random Forest    | 0.84(0.84-0.85) | 0.11 | 34093 | 72655 | 0.25 | 0.97 | 0.81 | 0.73 | 0.07 |

|               |   |                        |                 |      |       |       |      |      |      |      |      |
|---------------|---|------------------------|-----------------|------|-------|-------|------|------|------|------|------|
| Random Forest | C | Random Forest          | 0.85(0.85-0.85) | 0.11 | 33029 | 73719 | 0.25 | 0.97 | 0.80 | 0.74 | 0.07 |
| Random Forest | A | Extra Trees Regression | 0.84(0.84-0.84) | 0.11 | 32938 | 73810 | 0.25 | 0.97 | 0.79 | 0.74 | 0.07 |
| Random Forest | B | Extra Trees Regression | 0.84(0.84-0.85) | 0.12 | 32411 | 74337 | 0.26 | 0.97 | 0.80 | 0.75 | 0.07 |
| Random Forest | C | Extra Trees Regression | 0.85(0.85-0.85) | 0.11 | 33567 | 73181 | 0.25 | 0.97 | 0.80 | 0.74 | 0.07 |
| Random Forest | A | Ridge Regression       | 0.84(0.45-0.84) | 0.11 | 34587 | 72161 | 0.24 | 0.97 | 0.80 | 0.73 | 0.07 |
| Random Forest | B | Ridge Regression       | 0.84(0.84-0.85) | 0.12 | 31643 | 75105 | 0.26 | 0.97 | 0.79 | 0.76 | 0.07 |
| Random Forest | C | Ridge Regression       | 0.85(0.85-0.85) | 0.12 | 32531 | 74217 | 0.25 | 0.97 | 0.79 | 0.75 | 0.07 |
| Random Forest | A | Normal Value           | 0.84(0.84-0.84) | 0.12 | 31234 | 75514 | 0.26 | 0.97 | 0.78 | 0.76 | 0.07 |
| Random Forest | B | Normal Value           | 0.85(0.84-0.85) | 0.11 | 32711 | 74037 | 0.26 | 0.97 | 0.80 | 0.75 | 0.07 |
| Random Forest | C | Normal Value           | 0.85(0.85-0.85) | 0.12 | 31159 | 75589 | 0.26 | 0.97 | 0.78 | 0.76 | 0.07 |
| Random Forest | A | No Missing             | 0.77(0.77-0.78) | 0.18 | 36332 | 70416 | 0.20 | 0.96 | 0.71 | 0.70 | 0.08 |
| Random Forest | B | No Missing             | 0.83(0.82-0.83) | 0.16 | 31836 | 74912 | 0.25 | 0.97 | 0.77 | 0.75 | 0.07 |
| Random Forest | C | No Missing             | 0.84(0.83-0.84) | 0.16 | 34517 | 72231 | 0.24 | 0.97 | 0.78 | 0.73 | 0.08 |

1  
2  
3  
4  
5  
6  
7  
8  
9  
10  
11  
12  
13  
14  
15  
16  
17  
18  
19  
20  
21  
22  
23  
24  
25  
26  
27  
28  
29  
30  
31  
32  
33  
34  
35  
36  
37  
38  
39  
40  
41  
42  
43  
44  
45  
46  
47

|                |   |                        |                 |      |       |       |      |      |      |      |      |
|----------------|---|------------------------|-----------------|------|-------|-------|------|------|------|------|------|
| Random Forest  | D | None                   | 0.83(0.83-0.83) | 0.11 | 33407 | 73341 | 0.24 | 0.97 | 0.77 | 0.74 | 0.07 |
| Neural Network | A | Mean Value             | 0.83(0.83-0.84) | 0.53 | 35031 | 71717 | 0.24 | 0.97 | 0.80 | 0.72 | 0.19 |
| Neural Network | B | Mean Value             | 0.84(0.84-0.84) | 0.52 | 32716 | 74032 | 0.25 | 0.97 | 0.79 | 0.75 | 0.17 |
| Neural Network | C | Mean Value             | 0.84(0.84-0.84) | 0.53 | 32549 | 74199 | 0.25 | 0.97 | 0.79 | 0.75 | 0.17 |
| Neural Network | A | Random Forest          | 0.83(0.83-0.83) | 0.55 | 32515 | 74233 | 0.25 | 0.97 | 0.77 | 0.75 | 0.19 |
| Neural Network | B | Random Forest          | 0.84(0.84-0.84) | 0.57 | 30842 | 75906 | 0.26 | 0.97 | 0.77 | 0.76 | 0.18 |
| Neural Network | C | Random Forest          | 0.84(0.84-0.84) | 0.55 | 34144 | 72604 | 0.24 | 0.97 | 0.79 | 0.73 | 0.18 |
| Neural Network | A | Extra Trees Regression | 0.83(0.83-0.83) | 0.50 | 37351 | 69397 | 0.23 | 0.97 | 0.82 | 0.70 | 0.19 |
| Neural Network | B | Extra Trees Regression | 0.84(0.84-0.84) | 0.54 | 33529 | 73219 | 0.25 | 0.97 | 0.80 | 0.74 | 0.18 |
| Neural Network | C | Extra Trees Regression | 0.84(0.84-0.84) | 0.49 | 33324 | 73424 | 0.25 | 0.97 | 0.79 | 0.74 | 0.16 |
| Neural Network | A | Ridge Regression       | 0.83(0.82-0.83) | 0.51 | 33864 | 72884 | 0.24 | 0.97 | 0.78 | 0.73 | 0.17 |
| Neural Network | B | Ridge Regression       | 0.84(0.83-0.84) | 0.52 | 31186 | 75562 | 0.26 | 0.97 | 0.78 | 0.76 | 0.17 |
| Neural Network | C | Ridge Regression       | 0.84(0.84-0.84) | 0.55 | 32145 | 74603 | 0.25 | 0.97 | 0.78 | 0.75 | 0.18 |

|                |   |              |                 |      |       |       |      |      |      |      |      |
|----------------|---|--------------|-----------------|------|-------|-------|------|------|------|------|------|
| Neural Network | A | Normal Value | 0.83(0.83-0.84) | 0.58 | 31675 | 75073 | 0.25 | 0.97 | 0.77 | 0.76 | 0.19 |
| Neural Network | B | Normal Value | 0.84(0.84-0.84) | 0.45 | 35026 | 71722 | 0.24 | 0.97 | 0.81 | 0.72 | 0.16 |
| Neural Network | C | Normal Value | 0.84(0.84-0.84) | 0.55 | 32864 | 73884 | 0.25 | 0.97 | 0.79 | 0.75 | 0.18 |
| Neural Network | A | No Missing   | 0.66(0.64-0.68) | 0.76 | 49011 | 57737 | 0.14 | 0.94 | 0.65 | 0.56 | 0.50 |
| Neural Network | B | No Missing   | 0.79(0.78-0.79) | 0.59 | 32676 | 74072 | 0.23 | 0.96 | 0.71 | 0.74 | 0.21 |
| Neural Network | C | No Missing   | 0.79(0.78-0.79) | 0.59 | 38619 | 68129 | 0.20 | 0.96 | 0.75 | 0.68 | 0.24 |
| Neural Network | D | None         | 0.83(0.83-0.83) | 0.52 | 33760 | 72988 | 0.24 | 0.97 | 0.78 | 0.73 | 0.18 |

Table B.2: Model Performance (Using only lab variables)

| Classification Method | Dataset | Imputation Method      | AUROC (95%CI)   | Optimal Cutoff | Predicted Cases |          | Accurate Rate |          | Sensitivity | Specificity | Brier Score |
|-----------------------|---------|------------------------|-----------------|----------------|-----------------|----------|---------------|----------|-------------|-------------|-------------|
|                       |         |                        |                 |                | Death           | Survival | Death         | Survival |             |             |             |
| Logistic Regression   | A       | Mean Value             | 0.63(0.62-0.63) | 0.50           | 32327           | 74421    | 0.16          | 0.93     | 0.50        | 0.72        | 0.24        |
| Logistic Regression   | B       | Mean Value             | 0.70(0.70-0.70) | 0.47           | 33350           | 73398    | 0.21          | 0.95     | 0.66        | 0.73        | 0.20        |
| Logistic Regression   | C       | Mean Value             | 0.74(0.74-0.74) | 0.47           | 35248           | 71500    | 0.19          | 0.95     | 0.62        | 0.70        | 0.22        |
| Logistic Regression   | A       | Random Forest          | 0.68(0.68-0.69) | 0.48           | 39566           | 67182    | 0.17          | 0.94     | 0.63        | 0.66        | 0.23        |
| Logistic Regression   | B       | Random Forest          | 0.71(0.71-0.71) | 0.45           | 37758           | 68990    | 0.20          | 0.96     | 0.71        | 0.69        | 0.20        |
| Logistic Regression   | C       | Random Forest          | 0.76(0.76-0.76) | 0.47           | 38421           | 68327    | 0.18          | 0.95     | 0.66        | 0.67        | 0.21        |
| Logistic Regression   | A       | Extra Trees Regression | 0.69(0.69-0.70) | 0.46           | 43607           | 63141    | 0.17          | 0.95     | 0.69        | 0.62        | 0.22        |
| Logistic Regression   | B       | Extra Trees Regression | 0.72(0.72-0.72) | 0.44           | 39295           | 67453    | 0.20          | 0.96     | 0.73        | 0.67        | 0.19        |
| Logistic Regression   | C       | Extra Trees Regression | 0.76(0.76-0.76) | 0.45           | 42675           | 64073    | 0.17          | 0.95     | 0.71        | 0.63        | 0.21        |
| Logistic Regression   | A       | Ridge Regression       | 0.70(0.69-0.70) | 0.47           | 42514           | 64234    | 0.17          | 0.95     | 0.69        | 0.63        | 0.22        |
| Logistic Regression   | B       | Ridge Regression       | 0.72(0.72-0.72) | 0.44           | 39856           | 66892    | 0.20          | 0.96     | 0.75        | 0.67        | 0.19        |



|                     |   |                  |                   |      |       |       |      |      |      |      |      |
|---------------------|---|------------------|-------------------|------|-------|-------|------|------|------|------|------|
| Logistic Regression | C | Ridge Regression | 0.77(0.76-0.77)   | 0.45 | 42737 | 64011 | 0.17 | 0.95 | 0.71 | 0.63 | 0.21 |
| Logistic Regression | A | Normal Value     | 0.60(0.59-0.60)   | 0.49 | 31990 | 74758 | 0.15 | 0.92 | 0.46 | 0.72 | 0.24 |
| Logistic Regression | B | Normal Value     | 0.71(0.70-0.71)   | 0.45 | 38325 | 68423 | 0.19 | 0.95 | 0.70 | 0.68 | 0.20 |
| Logistic Regression | C | Normal Value     | 0.74 (0.74-0.75)  | 0.46 | 41447 | 65301 | 0.17 | 0.95 | 0.68 | 0.64 | 0.22 |
| Logistic Regression | A | No Missing       | 0.54 (0.49-0.59)  | 0.57 | 17678 | 89070 | 0.15 | 0.91 | 0.25 | 0.84 | 0.27 |
| Logistic Regression | B | No Missing       | 0.68 n(0.68-0.68) | 0.45 | 32766 | 73982 | 0.20 | 0.95 | 0.64 | 0.73 | 0.19 |
| Logistic Regression | C | No Missing       | 0.73(0.73-0.73)   | 0.50 | 30965 | 75783 | 0.19 | 0.94 | 0.55 | 0.74 | 0.23 |
| Logistic Regression | D | None             | 0.72(0.72-0.72)   | 0.49 | 35766 | 70982 | 0.19 | 0.95 | 0.64 | 0.70 | 0.21 |
| Random Forest       | A | Mean Value       | 0.71(0.71-0.71)   | 0.09 | 46226 | 60522 | 0.17 | 0.95 | 0.73 | 0.60 | 0.09 |
| Random Forest       | B | Mean Value       | 0.73(0.73-0.73)   | 0.10 | 44628 | 62120 | 0.18 | 0.96 | 0.75 | 0.62 | 0.09 |
| Random Forest       | C | Mean Value       | 0.73(0.73-0.74)   | 0.10 | 44525 | 62223 | 0.18 | 0.96 | 0.75 | 0.62 | 0.09 |
| Random Forest       | A | Random Forest    | 0.76(0.75-0.76)   | 0.09 | 41715 | 65033 | 0.18 | 0.96 | 0.74 | 0.65 | 0.08 |
| Random Forest       | B | Random Forest    | 0.77(0.77-0.77)   | 0.10 | 38154 | 68594 | 0.20 | 0.96 | 0.75 | 0.69 | 0.08 |

1  
2  
3  
4  
5  
6  
7  
8  
9  
10  
11  
12  
13  
14  
15  
16  
17  
18  
19  
20  
21  
22  
23  
24  
25  
26  
27  
28  
29  
30  
31  
32  
33  
34  
35  
36  
37  
38  
39  
40  
41  
42  
43  
44  
45  
46  
47

|               |   |                        |                 |      |       |       |      |      |      |      |      |
|---------------|---|------------------------|-----------------|------|-------|-------|------|------|------|------|------|
| Random Forest | C | Random Forest          | 0.78(0.78-0.78) | 0.09 | 40709 | 66039 | 0.19 | 0.96 | 0.75 | 0.66 | 0.08 |
| Random Forest | A | Extra Trees Regression | 0.77(0.77-0.77) | 0.09 | 43230 | 63518 | 0.19 | 0.96 | 0.77 | 0.64 | 0.08 |
| Random Forest | B | Extra Trees Regression | 0.78(0.77-0.78) | 0.10 | 38734 | 68014 | 0.20 | 0.96 | 0.76 | 0.68 | 0.08 |
| Random Forest | C | Extra Trees Regression | 0.78(0.78-0.79) | 0.10 | 38810 | 67938 | 0.20 | 0.96 | 0.74 | 0.68 | 0.08 |
| Random Forest | A | Ridge Regression       | 0.77(0.77-0.78) | 0.10 | 39913 | 66835 | 0.20 | 0.96 | 0.75 | 0.67 | 0.08 |
| Random Forest | B | Ridge Regression       | 0.78(0.78-0.78) | 0.09 | 39663 | 67085 | 0.20 | 0.97 | 0.77 | 0.67 | 0.08 |
| Random Forest | C | Ridge Regression       | 0.79(0.79-0.79) | 0.09 | 40249 | 66499 | 0.20 | 0.96 | 0.76 | 0.66 | 0.08 |
| Random Forest | A | Normal Value           | 0.71(0.71-0.71) | 0.10 | 46047 | 60701 | 0.17 | 0.95 | 0.73 | 0.60 | 0.09 |
| Random Forest | B | Normal Value           | 0.73(0.73-0.73) | 0.10 | 44400 | 62348 | 0.18 | 0.96 | 0.75 | 0.62 | 0.09 |
| Random Forest | C | Normal Value           | 0.73(0.73-0.74) | 0.09 | 46774 | 59974 | 0.17 | 0.96 | 0.77 | 0.60 | 0.09 |
| Random Forest | A | No Missing             | 0.66(0.64-0.67) | 0.26 | 20159 | 86589 | 0.21 | 0.93 | 0.40 | 0.83 | 0.10 |
| Random Forest | B | No Missing             | 0.72(0.71-0.73) | 0.14 | 52201 | 54547 | 0.16 | 0.96 | 0.78 | 0.54 | 0.08 |
| Random Forest | C | No Missing             | 0.74(0.73-0.74) | 0.21 | 26193 | 80555 | 0.22 | 0.94 | 0.55 | 0.79 | 0.09 |

|                |   |                        |                 |      |       |       |      |      |      |      |      |
|----------------|---|------------------------|-----------------|------|-------|-------|------|------|------|------|------|
| Random Forest  | D | None                   | 0.66(0.66-0.67) | 0.45 | 33868 | 72880 | 0.18 | 0.94 | 0.57 | 0.71 | 0.18 |
| Neural Network | A | Mean Value             | 0.71(0.70-0.73) | 0.47 | 33169 | 73579 | 0.19 | 0.94 | 0.60 | 0.72 | 0.19 |
| Neural Network | B | Mean Value             | 0.74(0.74-0.75) | 0.49 | 31171 | 75577 | 0.21 | 0.95 | 0.63 | 0.75 | 0.19 |
| Neural Network | C | Mean Value             | 0.75(0.75-0.76) | 0.40 | 42096 | 64652 | 0.18 | 0.96 | 0.74 | 0.64 | 0.18 |
| Neural Network | A | Random Forest          | 0.74(0.74-0.74) | 0.50 | 37930 | 68818 | 0.19 | 0.95 | 0.68 | 0.68 | 0.19 |
| Neural Network | B | Random Forest          | 0.75(0.73-0.76) | 0.54 | 36554 | 70194 | 0.20 | 0.96 | 0.71 | 0.70 | 0.22 |
| Neural Network | C | Random Forest          | 0.77(0.77-0.77) | 0.42 | 42444 | 64304 | 0.18 | 0.96 | 0.74 | 0.64 | 0.18 |
| Neural Network | A | Extra Trees Regression | 0.75(0.75-0.76) | 0.42 | 44585 | 62163 | 0.18 | 0.96 | 0.76 | 0.62 | 0.18 |
| Neural Network | B | Extra Trees Regression | 0.76(0.75-0.76) | 0.46 | 40067 | 66681 | 0.20 | 0.96 | 0.75 | 0.67 | 0.19 |
| Neural Network | C | Extra Trees Regression | 0.77(0.77-0.77) | 0.48 | 39088 | 67660 | 0.19 | 0.96 | 0.71 | 0.67 | 0.20 |
| Neural Network | A | Ridge Regression       | 0.73(0.73-0.74) | 0.49 | 43129 | 63619 | 0.18 | 0.96 | 0.74 | 0.63 | 0.21 |
| Neural Network | B | Ridge Regression       | 0.75(0.74-0.76) | 0.44 | 39388 | 67360 | 0.20 | 0.96 | 0.74 | 0.67 | 0.18 |
| Neural Network | C | Ridge Regression       | 0.78(0.78-0.78) | 0.53 | 38048 | 68700 | 0.19 | 0.95 | 0.68 | 0.68 | 0.21 |

1  
2  
3  
4  
5  
6  
7  
8  
9  
10  
11  
12  
13  
14  
15  
16  
17  
18  
19  
20  
21  
22  
23  
24  
25  
26  
27  
28  
29  
30  
31  
32  
33  
34  
35  
36  
37  
38  
39  
40  
41  
42  
43  
44  
45  
46  
47

|                |   |              |                 |      |       |        |      |      |      |      |      |
|----------------|---|--------------|-----------------|------|-------|--------|------|------|------|------|------|
| Neural Network | A | Normal Value | 0.72(0.71-0.72) | 0.45 | 33193 | 73555  | 0.19 | 0.95 | 0.61 | 0.72 | 0.18 |
| Neural Network | B | Normal Value | 0.74(0.73-0.75) | 0.50 | 37560 | 69188  | 0.20 | 0.96 | 0.71 | 0.69 | 0.20 |
| Neural Network | C | Normal Value | 0.76(0.76-0.76) | 0.41 | 42187 | 64561  | 0.18 | 0.96 | 0.74 | 0.64 | 0.18 |
| Neural Network | A | No Missing   | 0.47(0.45-0.49) | 0.79 | 2628  | 104120 | 0.14 | 0.90 | 0.04 | 0.98 | 0.44 |
| Neural Network | B | No Missing   | 0.70(0.68-0.72) | 0.69 | 23720 | 83028  | 0.23 | 0.94 | 0.52 | 0.81 | 0.31 |
| Neural Network | C | No Missing   | 0.73(0.72-0.73) | 0.57 | 51077 | 55671  | 0.15 | 0.95 | 0.74 | 0.55 | 0.29 |
| Neural Network | D | None         | 0.74(0.73-0.74) | 0.50 | 36925 | 69823  | 0.19 | 0.95 | 0.67 | 0.69 | 0.21 |
