# Supplementary material for: Variation in model performance by data cleanliness and classification methods in the prediction of 30-day ICU mortality, a US nationwide retrospective cohort and simulation study
Source: PubMed Central journal article supplement — BMJ Open. 2020 Dec 2;10(12):e041421. doi: 10.1136/bmjopen-2020-041421 (PMC7713192; doi:10.1136/bmjopen-2020-041421), 2020-12-02
Supplement: bmjopen-2020-041421supp002.pdf [file bmjopen-2020-041421supp002.pdf]

## Appendix B

Table B.1: Model Performances (Full Model)

| Classification Method | Dataset | Imputation Method      | AUROC (95%CI)   | Optimal Cutoff | Predicted Cases |          | Accurate Rate |          | Sensitivity | Specificity | Brier Score |
|-----------------------|---------|------------------------|-----------------|----------------|-----------------|----------|---------------|----------|-------------|-------------|-------------|
|                       |         |                        |                 |                | Death           | Survival | Death         | Survival |             |             |             |
| Logistic Regression   | A       | Mean Value             | 0.78(0.76-0.80) | 0.48           | 37199           | 69549    | 0.21          | 0.96     | 0.74        | 0.69        | 0.19        |
| Logistic Regression   | B       | Mean Value             | 0.79(0.75-0.83) | 0.46           | 34915           | 71833    | 0.24          | 0.97     | 0.80        | 0.72        | 0.17        |
| Logistic Regression   | C       | Mean Value             | 0.83(0.83-0.83) | 0.46           | 35970           | 70778    | 0.23          | 0.97     | 0.79        | 0.71        | 0.17        |
| Logistic Regression   | A       | Random Forest          | 0.75(0.72-0.78) | 0.49           | 39528           | 67220    | 0.18          | 0.95     | 0.69        | 0.66        | 0.21        |
| Logistic Regression   | B       | Random Forest          | 0.82(0.82-0.82) | 0.49           | 31996           | 74752    | 0.25          | 0.97     | 0.77        | 0.75        | 0.17        |
| Logistic Regression   | C       | Random Forest          | 0.83(0.83-0.84) | 0.46           | 36017           | 70731    | 0.23          | 0.97     | 0.79        | 0.71        | 0.17        |
| Logistic Regression   | A       | Extra Trees Regression | 0.74(0.72-0.76) | 0.46           | 45762           | 60986    | 0.17          | 0.96     | 0.74        | 0.61        | 0.21        |
| Logistic Regression   | B       | Extra Trees Regression | 0.82(0.81-0.82) | 0.47           | 33642           | 73106    | 0.25          | 0.97     | 0.79        | 0.74        | 0.17        |
| Logistic Regression   | C       | Extra Trees Regression | 0.83(0.83-0.84) | 0.47           | 34579           | 72169    | 0.24          | 0.97     | 0.78        | 0.73        | 0.17        |
| Logistic Regression   | A       | Ridge Regression       | 0.79(0.77-0.82) | 0.46           | 38579           | 68169    | 0.21          | 0.97     | 0.78        | 0.68        | 0.18        |
| Logistic Regression   | B       | Ridge Regression       | 0.80(0.78-0.83) | 0.46           | 35034           | 71714    | 0.24          | 0.97     | 0.80        | 0.72        | 0.17        |

|                     |   |                  |                 |      |       |       |      |      |      |      |      |
|---------------------|---|------------------|-----------------|------|-------|-------|------|------|------|------|------|
| Logistic Regression | C | Ridge Regression | 0.83(0.83-0.84) | 0.47 | 35220 | 71528 | 0.23 | 0.97 | 0.78 | 0.72 | 0.17 |
| Logistic Regression | A | Normal Value     | 0.76(0.73-0.79) | 0.50 | 37392 | 69356 | 0.18 | 0.95 | 0.63 | 0.68 | 0.22 |
| Logistic Regression | B | Normal Value     | 0.80(0.76-0.83) | 0.50 | 30977 | 75771 | 0.26 | 0.97 | 0.76 | 0.76 | 0.17 |
| Logistic Regression | C | Normal Value     | 0.83(0.83-0.83) | 0.46 | 35676 | 71072 | 0.23 | 0.97 | 0.78 | 0.72 | 0.17 |
| Logistic Regression | A | No Missing       | 0.73(0.72-0.74) | 0.43 | 37658 | 69090 | 0.18 | 0.95 | 0.66 | 0.68 | 0.18 |
| Logistic Regression | B | No Missing       | 0.8(0.80-0.81)  | 0.42 | 33153 | 73595 | 0.24 | 0.97 | 0.76 | 0.74 | 0.14 |
| Logistic Regression | C | No Missing       | 0.82(0.82-0.82) | 0.44 | 35333 | 71415 | 0.22 | 0.96 | 0.76 | 0.72 | 0.16 |
| Logistic Regression | D | None             | 0.83(0.83-0.83) | 0.47 | 34184 | 72564 | 0.24 | 0.97 | 0.78 | 0.73 | 0.17 |
| Random Forest       | A | Mean Value       | 0.84(0.84-0.84) | 0.12 | 32330 | 74418 | 0.26 | 0.97 | 0.79 | 0.75 | 0.07 |
| Random Forest       | B | Mean Value       | 0.85(0.84-0.85) | 0.11 | 32642 | 74106 | 0.26 | 0.97 | 0.80 | 0.75 | 0.07 |
| Random Forest       | C | Mean Value       | 0.85(0.85-0.85) | 0.11 | 33548 | 73200 | 0.25 | 0.97 | 0.81 | 0.74 | 0.07 |
| Random Forest       | A | Random Forest    | 0.84(0.84-0.84) | 0.12 | 32659 | 74089 | 0.25 | 0.97 | 0.78 | 0.75 | 0.07 |
| Random Forest       | B | Random Forest    | 0.84(0.84-0.85) | 0.11 | 34093 | 72655 | 0.25 | 0.97 | 0.81 | 0.73 | 0.07 |

|               |   |                        |                 |      |       |       |      |      |      |      |      |
|---------------|---|------------------------|-----------------|------|-------|-------|------|------|------|------|------|
| Random Forest | C | Random Forest          | 0.85(0.85-0.85) | 0.11 | 33029 | 73719 | 0.25 | 0.97 | 0.80 | 0.74 | 0.07 |
| Random Forest | A | Extra Trees Regression | 0.84(0.84-0.84) | 0.11 | 32938 | 73810 | 0.25 | 0.97 | 0.79 | 0.74 | 0.07 |
| Random Forest | B | Extra Trees Regression | 0.84(0.84-0.85) | 0.12 | 32411 | 74337 | 0.26 | 0.97 | 0.80 | 0.75 | 0.07 |
| Random Forest | C | Extra Trees Regression | 0.85(0.85-0.85) | 0.11 | 33567 | 73181 | 0.25 | 0.97 | 0.80 | 0.74 | 0.07 |
| Random Forest | A | Ridge Regression       | 0.84(0.45-0.84) | 0.11 | 34587 | 72161 | 0.24 | 0.97 | 0.80 | 0.73 | 0.07 |
| Random Forest | B | Ridge Regression       | 0.84(0.84-0.85) | 0.12 | 31643 | 75105 | 0.26 | 0.97 | 0.79 | 0.76 | 0.07 |
| Random Forest | C | Ridge Regression       | 0.85(0.85-0.85) | 0.12 | 32531 | 74217 | 0.25 | 0.97 | 0.79 | 0.75 | 0.07 |
| Random Forest | A | Normal Value           | 0.84(0.84-0.84) | 0.12 | 31234 | 75514 | 0.26 | 0.97 | 0.78 | 0.76 | 0.07 |
| Random Forest | B | Normal Value           | 0.85(0.84-0.85) | 0.11 | 32711 | 74037 | 0.26 | 0.97 | 0.80 | 0.75 | 0.07 |
| Random Forest | C | Normal Value           | 0.85(0.85-0.85) | 0.12 | 31159 | 75589 | 0.26 | 0.97 | 0.78 | 0.76 | 0.07 |
| Random Forest | A | No Missing             | 0.77(0.77-0.78) | 0.18 | 36332 | 70416 | 0.20 | 0.96 | 0.71 | 0.70 | 0.08 |
| Random Forest | B | No Missing             | 0.83(0.82-0.83) | 0.16 | 31836 | 74912 | 0.25 | 0.97 | 0.77 | 0.75 | 0.07 |
| Random Forest | C | No Missing             | 0.84(0.83-0.84) | 0.16 | 34517 | 72231 | 0.24 | 0.97 | 0.78 | 0.73 | 0.08 |

|                |   |                        |                 |      |       |       |      |      |      |      |      |
|----------------|---|------------------------|-----------------|------|-------|-------|------|------|------|------|------|
| Random Forest  | D | None                   | 0.83(0.83-0.83) | 0.11 | 33407 | 73341 | 0.24 | 0.97 | 0.77 | 0.74 | 0.07 |
| Neural Network | A | Mean Value             | 0.83(0.83-0.84) | 0.53 | 35031 | 71717 | 0.24 | 0.97 | 0.80 | 0.72 | 0.19 |
| Neural Network | B | Mean Value             | 0.84(0.84-0.84) | 0.52 | 32716 | 74032 | 0.25 | 0.97 | 0.79 | 0.75 | 0.17 |
| Neural Network | C | Mean Value             | 0.84(0.84-0.84) | 0.53 | 32549 | 74199 | 0.25 | 0.97 | 0.79 | 0.75 | 0.17 |
| Neural Network | A | Random Forest          | 0.83(0.83-0.83) | 0.55 | 32515 | 74233 | 0.25 | 0.97 | 0.77 | 0.75 | 0.19 |
| Neural Network | B | Random Forest          | 0.84(0.84-0.84) | 0.57 | 30842 | 75906 | 0.26 | 0.97 | 0.77 | 0.76 | 0.18 |
| Neural Network | C | Random Forest          | 0.84(0.84-0.84) | 0.55 | 34144 | 72604 | 0.24 | 0.97 | 0.79 | 0.73 | 0.18 |
| Neural Network | A | Extra Trees Regression | 0.83(0.83-0.83) | 0.50 | 37351 | 69397 | 0.23 | 0.97 | 0.82 | 0.70 | 0.19 |
| Neural Network | B | Extra Trees Regression | 0.84(0.84-0.84) | 0.54 | 33529 | 73219 | 0.25 | 0.97 | 0.80 | 0.74 | 0.18 |
| Neural Network | C | Extra Trees Regression | 0.84(0.84-0.84) | 0.49 | 33324 | 73424 | 0.25 | 0.97 | 0.79 | 0.74 | 0.16 |
| Neural Network | A | Ridge Regression       | 0.83(0.82-0.83) | 0.51 | 33864 | 72884 | 0.24 | 0.97 | 0.78 | 0.73 | 0.17 |
| Neural Network | B | Ridge Regression       | 0.84(0.83-0.84) | 0.52 | 31186 | 75562 | 0.26 | 0.97 | 0.78 | 0.76 | 0.17 |
| Neural Network | C | Ridge Regression       | 0.84(0.84-0.84) | 0.55 | 32145 | 74603 | 0.25 | 0.97 | 0.78 | 0.75 | 0.18 |

|                |   |              |                 |      |       |       |      |      |      |      |      |
|----------------|---|--------------|-----------------|------|-------|-------|------|------|------|------|------|
| Neural Network | A | Normal Value | 0.83(0.83-0.84) | 0.58 | 31675 | 75073 | 0.25 | 0.97 | 0.77 | 0.76 | 0.19 |
| Neural Network | B | Normal Value | 0.84(0.84-0.84) | 0.45 | 35026 | 71722 | 0.24 | 0.97 | 0.81 | 0.72 | 0.16 |
| Neural Network | C | Normal Value | 0.84(0.84-0.84) | 0.55 | 32864 | 73884 | 0.25 | 0.97 | 0.79 | 0.75 | 0.18 |
| Neural Network | A | No Missing   | 0.66(0.64-0.68) | 0.76 | 49011 | 57737 | 0.14 | 0.94 | 0.65 | 0.56 | 0.50 |
| Neural Network | B | No Missing   | 0.79(0.78-0.79) | 0.59 | 32676 | 74072 | 0.23 | 0.96 | 0.71 | 0.74 | 0.21 |
| Neural Network | C | No Missing   | 0.79(0.78-0.79) | 0.59 | 38619 | 68129 | 0.20 | 0.96 | 0.75 | 0.68 | 0.24 |
| Neural Network | D | None         | 0.83(0.83-0.83) | 0.52 | 33760 | 72988 | 0.24 | 0.97 | 0.78 | 0.73 | 0.18 |

Table B.2: Model Performance (Using only lab variables)

| Classification Method | Dataset | Imputation Method      | AUROC (95%CI)   | Optimal Cutoff | Predicted Cases |          | Accurate Rate |          | Sensitivity | Specificity | Brier Score |
|-----------------------|---------|------------------------|-----------------|----------------|-----------------|----------|---------------|----------|-------------|-------------|-------------|
|                       |         |                        |                 |                | Death           | Survival | Death         | Survival |             |             |             |
| Logistic Regression   | A       | Mean Value             | 0.63(0.62-0.63) | 0.50           | 32327           | 74421    | 0.16          | 0.93     | 0.50        | 0.72        | 0.24        |
| Logistic Regression   | B       | Mean Value             | 0.70(0.70-0.70) | 0.47           | 33350           | 73398    | 0.21          | 0.95     | 0.66        | 0.73        | 0.20        |
| Logistic Regression   | C       | Mean Value             | 0.74(0.74-0.74) | 0.47           | 35248           | 71500    | 0.19          | 0.95     | 0.62        | 0.70        | 0.22        |
| Logistic Regression   | A       | Random Forest          | 0.68(0.68-0.69) | 0.48           | 39566           | 67182    | 0.17          | 0.94     | 0.63        | 0.66        | 0.23        |
| Logistic Regression   | B       | Random Forest          | 0.71(0.71-0.71) | 0.45           | 37758           | 68990    | 0.20          | 0.96     | 0.71        | 0.69        | 0.20        |
| Logistic Regression   | C       | Random Forest          | 0.76(0.76-0.76) | 0.47           | 38421           | 68327    | 0.18          | 0.95     | 0.66        | 0.67        | 0.21        |
| Logistic Regression   | A       | Extra Trees Regression | 0.69(0.69-0.70) | 0.46           | 43607           | 63141    | 0.17          | 0.95     | 0.69        | 0.62        | 0.22        |
| Logistic Regression   | B       | Extra Trees Regression | 0.72(0.72-0.72) | 0.44           | 39295           | 67453    | 0.20          | 0.96     | 0.73        | 0.67        | 0.19        |
| Logistic Regression   | C       | Extra Trees Regression | 0.76(0.76-0.76) | 0.45           | 42675           | 64073    | 0.17          | 0.95     | 0.71        | 0.63        | 0.21        |
| Logistic Regression   | A       | Ridge Regression       | 0.70(0.69-0.70) | 0.47           | 42514           | 64234    | 0.17          | 0.95     | 0.69        | 0.63        | 0.22        |
| Logistic Regression   | B       | Ridge Regression       | 0.72(0.72-0.72) | 0.44           | 39856           | 66892    | 0.20          | 0.96     | 0.75        | 0.67        | 0.19        |

|                     |   |                  |                   |      |       |       |      |      |      |      |      |
|---------------------|---|------------------|-------------------|------|-------|-------|------|------|------|------|------|
| Logistic Regression | C | Ridge Regression | 0.77(0.76-0.77)   | 0.45 | 42737 | 64011 | 0.17 | 0.95 | 0.71 | 0.63 | 0.21 |
| Logistic Regression | A | Normal Value     | 0.60(0.59-0.60)   | 0.49 | 31990 | 74758 | 0.15 | 0.92 | 0.46 | 0.72 | 0.24 |
| Logistic Regression | B | Normal Value     | 0.71(0.70-0.71)   | 0.45 | 38325 | 68423 | 0.19 | 0.95 | 0.70 | 0.68 | 0.20 |
| Logistic Regression | C | Normal Value     | 0.74 (0.74-0.75)  | 0.46 | 41447 | 65301 | 0.17 | 0.95 | 0.68 | 0.64 | 0.22 |
| Logistic Regression | A | No Missing       | 0.54 (0.49-0.59)  | 0.57 | 17678 | 89070 | 0.15 | 0.91 | 0.25 | 0.84 | 0.27 |
| Logistic Regression | B | No Missing       | 0.68 n(0.68-0.68) | 0.45 | 32766 | 73982 | 0.20 | 0.95 | 0.64 | 0.73 | 0.19 |
| Logistic Regression | C | No Missing       | 0.73(0.73-0.73)   | 0.50 | 30965 | 75783 | 0.19 | 0.94 | 0.55 | 0.74 | 0.23 |
| Logistic Regression | D | None             | 0.72(0.72-0.72)   | 0.49 | 35766 | 70982 | 0.19 | 0.95 | 0.64 | 0.70 | 0.21 |
| Random Forest       | A | Mean Value       | 0.71(0.71-0.71)   | 0.09 | 46226 | 60522 | 0.17 | 0.95 | 0.73 | 0.60 | 0.09 |
| Random Forest       | B | Mean Value       | 0.73(0.73-0.73)   | 0.10 | 44628 | 62120 | 0.18 | 0.96 | 0.75 | 0.62 | 0.09 |
| Random Forest       | C | Mean Value       | 0.73(0.73-0.74)   | 0.10 | 44525 | 62223 | 0.18 | 0.96 | 0.75 | 0.62 | 0.09 |
| Random Forest       | A | Random Forest    | 0.76(0.75-0.76)   | 0.09 | 41715 | 65033 | 0.18 | 0.96 | 0.74 | 0.65 | 0.08 |
| Random Forest       | B | Random Forest    | 0.77(0.77-0.77)   | 0.10 | 38154 | 68594 | 0.20 | 0.96 | 0.75 | 0.69 | 0.08 |

|               |   |                        |                 |      |       |       |      |      |      |      |      |
|---------------|---|------------------------|-----------------|------|-------|-------|------|------|------|------|------|
| Random Forest | C | Random Forest          | 0.78(0.78-0.78) | 0.09 | 40709 | 66039 | 0.19 | 0.96 | 0.75 | 0.66 | 0.08 |
| Random Forest | A | Extra Trees Regression | 0.77(0.77-0.77) | 0.09 | 43230 | 63518 | 0.19 | 0.96 | 0.77 | 0.64 | 0.08 |
| Random Forest | B | Extra Trees Regression | 0.78(0.77-0.78) | 0.10 | 38734 | 68014 | 0.20 | 0.96 | 0.76 | 0.68 | 0.08 |
| Random Forest | C | Extra Trees Regression | 0.78(0.78-0.79) | 0.10 | 38810 | 67938 | 0.20 | 0.96 | 0.74 | 0.68 | 0.08 |
| Random Forest | A | Ridge Regression       | 0.77(0.77-0.78) | 0.10 | 39913 | 66835 | 0.20 | 0.96 | 0.75 | 0.67 | 0.08 |
| Random Forest | B | Ridge Regression       | 0.78(0.78-0.78) | 0.09 | 39663 | 67085 | 0.20 | 0.97 | 0.77 | 0.67 | 0.08 |
| Random Forest | C | Ridge Regression       | 0.79(0.79-0.79) | 0.09 | 40249 | 66499 | 0.20 | 0.96 | 0.76 | 0.66 | 0.08 |
| Random Forest | A | Normal Value           | 0.71(0.71-0.71) | 0.10 | 46047 | 60701 | 0.17 | 0.95 | 0.73 | 0.60 | 0.09 |
| Random Forest | B | Normal Value           | 0.73(0.73-0.73) | 0.10 | 44400 | 62348 | 0.18 | 0.96 | 0.75 | 0.62 | 0.09 |
| Random Forest | C | Normal Value           | 0.73(0.73-0.74) | 0.09 | 46774 | 59974 | 0.17 | 0.96 | 0.77 | 0.60 | 0.09 |
| Random Forest | A | No Missing             | 0.66(0.64-0.67) | 0.26 | 20159 | 86589 | 0.21 | 0.93 | 0.40 | 0.83 | 0.10 |
| Random Forest | B | No Missing             | 0.72(0.71-0.73) | 0.14 | 52201 | 54547 | 0.16 | 0.96 | 0.78 | 0.54 | 0.08 |
| Random Forest | C | No Missing             | 0.74(0.73-0.74) | 0.21 | 26193 | 80555 | 0.22 | 0.94 | 0.55 | 0.79 | 0.09 |



|                |   |                        |                 |      |       |       |      |      |      |      |      |
|----------------|---|------------------------|-----------------|------|-------|-------|------|------|------|------|------|
| Random Forest  | D | None                   | 0.66(0.66-0.67) | 0.45 | 33868 | 72880 | 0.18 | 0.94 | 0.57 | 0.71 | 0.18 |
| Neural Network | A | Mean Value             | 0.71(0.70-0.73) | 0.47 | 33169 | 73579 | 0.19 | 0.94 | 0.60 | 0.72 | 0.19 |
| Neural Network | B | Mean Value             | 0.74(0.74-0.75) | 0.49 | 31171 | 75577 | 0.21 | 0.95 | 0.63 | 0.75 | 0.19 |
| Neural Network | C | Mean Value             | 0.75(0.75-0.76) | 0.40 | 42096 | 64652 | 0.18 | 0.96 | 0.74 | 0.64 | 0.18 |
| Neural Network | A | Random Forest          | 0.74(0.74-0.74) | 0.50 | 37930 | 68818 | 0.19 | 0.95 | 0.68 | 0.68 | 0.19 |
| Neural Network | B | Random Forest          | 0.75(0.73-0.76) | 0.54 | 36554 | 70194 | 0.20 | 0.96 | 0.71 | 0.70 | 0.22 |
| Neural Network | C | Random Forest          | 0.77(0.77-0.77) | 0.42 | 42444 | 64304 | 0.18 | 0.96 | 0.74 | 0.64 | 0.18 |
| Neural Network | A | Extra Trees Regression | 0.75(0.75-0.76) | 0.42 | 44585 | 62163 | 0.18 | 0.96 | 0.76 | 0.62 | 0.18 |
| Neural Network | B | Extra Trees Regression | 0.76(0.75-0.76) | 0.46 | 40067 | 66681 | 0.20 | 0.96 | 0.75 | 0.67 | 0.19 |
| Neural Network | C | Extra Trees Regression | 0.77(0.77-0.77) | 0.48 | 39088 | 67660 | 0.19 | 0.96 | 0.71 | 0.67 | 0.20 |
| Neural Network | A | Ridge Regression       | 0.73(0.73-0.74) | 0.49 | 43129 | 63619 | 0.18 | 0.96 | 0.74 | 0.63 | 0.21 |
| Neural Network | B | Ridge Regression       | 0.75(0.74-0.76) | 0.44 | 39388 | 67360 | 0.20 | 0.96 | 0.74 | 0.67 | 0.18 |
| Neural Network | C | Ridge Regression       | 0.78(0.78-0.78) | 0.53 | 38048 | 68700 | 0.19 | 0.95 | 0.68 | 0.68 | 0.21 |

|                |   |              |                 |      |       |        |      |      |      |      |      |
|----------------|---|--------------|-----------------|------|-------|--------|------|------|------|------|------|
| Neural Network | A | Normal Value | 0.72(0.71-0.72) | 0.45 | 33193 | 73555  | 0.19 | 0.95 | 0.61 | 0.72 | 0.18 |
| Neural Network | B | Normal Value | 0.74(0.73-0.75) | 0.50 | 37560 | 69188  | 0.20 | 0.96 | 0.71 | 0.69 | 0.20 |
| Neural Network | C | Normal Value | 0.76(0.76-0.76) | 0.41 | 42187 | 64561  | 0.18 | 0.96 | 0.74 | 0.64 | 0.18 |
| Neural Network | A | No Missing   | 0.47(0.45-0.49) | 0.79 | 2628  | 104120 | 0.14 | 0.90 | 0.04 | 0.98 | 0.44 |
| Neural Network | B | No Missing   | 0.70(0.68-0.72) | 0.69 | 23720 | 83028  | 0.23 | 0.94 | 0.52 | 0.81 | 0.31 |
| Neural Network | C | No Missing   | 0.73(0.72-0.73) | 0.57 | 51077 | 55671  | 0.15 | 0.95 | 0.74 | 0.55 | 0.29 |
| Neural Network | D | None         | 0.74(0.73-0.74) | 0.50 | 36925 | 69823  | 0.19 | 0.95 | 0.67 | 0.69 | 0.21 |
